# Supplementary material for: Bifidobacterium longum supplementation prevents intestinal inflammation and cognitive impairment in sleep-deprived mice by modulating clock gene expression
Source: Royal Society of Chemistry journal article supplement (doi:10.1039/d5fo02921j), 2025-11-10
Supplement: d5fo02921j1.xlsx [file d5fo02921j1.xlsx]

## Sheet: Compounds
Tags	Checked	Name	Formula	Annot. Source: Predicted Compositions	Annot. Source: mzCloud Search	Annot. Source: mzVault Search	Annot. Source: Metabolika Search	Annot. Source: ChemSpider Search	Annot. DeltaMass [ppm]	Calc. MW	m/z	RT [min]	Area (Max.)	# ChemSpider Results	# mzCloud Results	# mzVault Results	mzCloud Best Match	mzCloud Best Match Confidence	mzCloud Best Sim. Match	mzVault Best Match	Compound Class	KEGG ID	mzCloud ID	mzVault Library Match: NCFB-small molecule metabolites-HILIC-NEG	mzVault Library Match: NCFB-small molecule metabolites-RPLC-NEG	MS2	Reference Ion	Area: 1.raw (F1)	Area: 2.raw (F2)	Area: 3.raw (F3)	Area: 4.raw (F4)	Area: 5.raw (F5)	Area: 6.raw (F6)	Area: 7.raw (F7)	Area: 8.raw (F8)	Area: 9.raw (F9)	Area: 10.raw (F10)	Area: 11.raw (F11)	Area: 12.raw (F12)	Area: 13.raw (F13)	Area: 14.raw (F14)	Area: 15.raw (F15)	Area: 16.raw (F16)	Area: 17.raw (F17)	Area: 18.raw (F18)	Area: 19.raw (F19)	Area: 20.raw (F20)	Area: 21.raw (F21)	Area: 22.raw (F22)
	FALSE	Deoxycholic acid	C24 H40 O4	Full match	Full match	No results	No results	Not the top hit	-0.95	392.292	391.285	2.421	2.21684e+10	19	2	0	99.3	10			Endogenous Metabolites		Autoprocessed-8527	No matches found	No matches found	DDA for preferred ion	[M-H]-1	2.67604e+09	3.42605e+09	2.76157e+09	2.0651e+09	2.34212e+09	2.38738e+09	2.65807e+09	2.92579e+09	2.68369e+09	2.64828e+09	2.46828e+09	4.23648e+09	1.73659e+09	7.95752e+08	1.22639e+09	1.89232e+09	2.84871e+09	1.97645e+09	1.04159e+09	8.04692e+08	1.37947e+09	1.32404e+09
	FALSE	6-Hydroxycaproic acid	C6 H12 O3	Full match	Full match	No results	No results	Partial match	-2.38	132.078	131.071	2.492	1.44064e+10	20	3	0	99.2	10			Endogenous Metabolites	C06103	Reference-1203	No matches found	No matches found	DDA for preferred ion	[M-H]-1	5.06758e+08	5.17681e+08	1.02222e+09	1.32131e+09	9.44237e+08	9.60618e+08	6.5321e+08	4.67852e+08	3.81155e+08	1.08913e+09	1.44874e+09	3.22283e+08	5.14753e+09	8.32715e+09	8.83316e+09	2.20516e+09	2.68187e+09	1.44064e+10	7.29104e+08	2.1064e+09	1.02952e+09	3.37515e+08
	FALSE	6-Chloro-5-methyl-1H-1,2,3-benzotriazole	C7 H6 Cl N3	No match	Full match	No results	No results	No match	-0.8	167.025	166.018	3.256	1.1153e+10	2	4	0	89.7	9.5					Reference-3729	No matches found	No matches found	DDA for preferred ion	[M-H]-1	8.29328e+09	2.70211e+09	4.03664e+09	6.22818e+09	4.50145e+09	5.85252e+09	4.91889e+09	5.00125e+09	6.02824e+09	5.96762e+09	3.24778e+09	3.79115e+09	3.56702e+09	6.87725e+09	5.1861e+09	6.22515e+09	3.28727e+09	5.73127e+09	2.93132e+09	2.64795e+09	3.37423e+09	1.1153e+10
	FALSE	Deoxycholic Acid	C24 H40 O4	Full match	Full match	No results	No results	Not the top hit	-0.85	392.292	391.285	2.848	1.06592e+10	19	2	0	99.8	10			Endogenous Metabolites		Autoprocessed-8527	No matches found	No matches found	DDA for preferred ion	[M-H]-1	8.09411e+09	7.56067e+09	6.91345e+09	5.80678e+09	6.3117e+09	5.38662e+09	7.43139e+09	6.80369e+09	8.72936e+09	8.61586e+09	7.04021e+09	1.06592e+10	5.37803e+09	3.35031e+09	3.9183e+09	5.94295e+09	7.57888e+09	5.30291e+09	5.18407e+09	4.35858e+09	6.4193e+09	5.68694e+09
	FALSE	Linoleic acid	C18 H32 O2	Full match	Full match	No results	Full match	Full match	-1.44	280.24	279.233	1.089	9.41344e+09	12	4	0	99.9	10			Endogenous Metabolites		Autoprocessed-8545	No matches found	No matches found	DDA for preferred ion	[M-H]-1	6.39066e+09	6.9091e+09	4.91214e+09	6.05239e+09	6.06058e+09	6.72277e+09	9.15358e+09	6.64741e+09	6.53043e+09	3.45404e+09	5.38935e+09	5.52921e+09	6.83429e+09	8.22573e+09	7.48992e+09	8.71206e+09	7.31857e+09	8.33633e+09	6.05057e+09	6.0482e+09	5.22747e+09	5.60996e+09
	FALSE	Xanthine	C5 H4 N4 O2	Full match	Full match	No results	Partial match	Full match	-1.91	152.033	151.026	6.07	6.87316e+09	3	1	0	92.5	9.6			Endogenous Metabolites	C00385	Reference-781	No matches found	No matches found	DDA for preferred ion	[M-H]-1	2.13224e+09	4.59677e+09	2.34088e+09	2.31317e+09	2.95098e+09	3.28819e+09	3.19106e+09	4.27154e+09	1.66484e+09	5.24604e+09	5.1948e+09	4.24415e+09	2.58431e+09	3.1152e+09	4.27675e+09	2.90173e+09	1.89861e+09	3.45214e+09	3.92993e+09	6.87316e+09	4.4276e+09	2.0048e+09
	FALSE	DL-Lactic Acid	C3 H6 O3	Full match	Full match	No results	Not the top hit	Full match	-1.92	90.0315	89.0242	5.881	6.79275e+09	13	2	0	100	10			Extractables/Leachables; Personal Care Products/Cosmetics; Therapeutics/Prescription Drugs; Natural Products/Medicines; Excipients/Additives/Colorants; Industrial Chemicals; Textile Chemicals/Auxiliary/Dyes	C01432	Reference-2603	No matches found	No matches found	DDA for preferred ion	[M-H]-1	3.81642e+08	9.72592e+08	1.39431e+09	2.15821e+09	1.23694e+09	1.12126e+09	9.29743e+08	6.69825e+08	4.40593e+08	6.09827e+08	1.99475e+09	5.30603e+08	1.4444e+09	4.88506e+09	6.79275e+09	2.13282e+09	1.21802e+09	5.07768e+09	4.81926e+08	2.30459e+09	6.46099e+08	6.74357e+08
	FALSE	Taurochenodeoxycholic acid	C26 H45 N O6 S	Not the top hit	Full match	No results	No results	Full match	-1.19	499.296	498.289	2.579	5.74327e+09	3	5	0	99.7	10			Endogenous Metabolites	C05465	Reference-1398	No matches found	No matches found	DDA for preferred ion	[M-H]-1	1.77764e+09	1.09448e+09	1.73659e+09	1.47011e+09	5.27026e+08	8.27476e+08	1.3021e+09	1.62519e+09	1.77674e+09	5.74327e+09	1.46776e+09	1.30755e+09	1.44334e+09	5.41072e+09	1.51452e+09	1.54696e+09	5.71462e+09	6.2851e+08	9.43737e+08	1.82747e+09	2.9284e+09	2.0695e+09
	FALSE	Hypoxanthine	C5 H4 N4 O	Full match	Full match	No results	Partial match	Partial match	-1.43	136.038	135.031	4.659	5.54575e+09	4	5	0	99.6	10	68.1		Endogenous Metabolites	C00262	Reference-441	No matches found	No matches found	DDA for preferred ion	[M-H]-1	1.82597e+09	4.43334e+09	1.87379e+09	2.32406e+09	2.55301e+09	2.70297e+09	2.85573e+09	3.44891e+09	1.4415e+09	3.57217e+09	4.44809e+09	3.47754e+09	2.86322e+09	2.40903e+09	3.0967e+09	3.45799e+09	2.13268e+09	2.72854e+09	3.29081e+09	5.54575e+09	3.04128e+09	2.29627e+09
	FALSE	β-Muricholic acid	C24 H40 O5	Full match	Full match	No results	No results	Not the top hit	-1.03	408.287	407.28	6.067	5.5425e+09	20	5	0	99.3	10			Endogenous Metabolites		Autoprocessed-8518	No matches found	No matches found	DDA for preferred ion	[M-H]-1	1.74744e+09	3.50326e+08	8.22258e+08	4.11092e+08	5.05128e+08	3.37941e+08	5.84528e+08	1.33496e+09	1.81003e+09	3.87669e+09	9.0485e+08	1.11086e+09	3.7791e+08	2.05098e+09	5.65777e+08	7.3348e+08	3.95445e+09	4.6327e+08	9.28344e+08	2.9291e+09	2.91184e+09	1.3007e+09
	FALSE	β-Muricholic acid	C24 H40 O5	Full match	Full match	No results	No results	Not the top hit	-1.3	408.287	407.28	4.247	5.06789e+09	20	5	0	99.9	10			Endogenous Metabolites		Autoprocessed-8518	No matches found	No matches found	DDA for preferred ion	[M-H]-1	2.62837e+09	1.36445e+09	2.67487e+09	2.29721e+09	2.0904e+09	1.67239e+09	3.01521e+09	3.13144e+09	3.38161e+09	4.13176e+09	2.02807e+09	4.03761e+09	1.40806e+09	2.62928e+09	2.59021e+09	1.85219e+09	4.25851e+09	1.8867e+09	2.54634e+09	3.41574e+09	4.25326e+09	4.3382e+09
	FALSE	Oleic acid	C18 H34 O2	Full match	Full match	No results	Full match	Full match	-1.55	282.255	281.248	1.075	4.65813e+09	10	3	0	99.9	10			Endogenous Metabolites		Autoprocessed-8524	No matches found	No matches found	DDA for preferred ion	[M-H]-1	3.02433e+09	4.65813e+09	2.78113e+09	2.7642e+09	3.0262e+09	3.34889e+09	3.75635e+09	2.69655e+09	4.01435e+09	3.27278e+09	2.98869e+09	3.16462e+09	2.37403e+09	2.543e+09	2.71493e+09	2.56231e+09	2.28853e+09	2.75323e+09	2.70052e+09	2.64167e+09	3.22755e+09	3.17376e+09
	FALSE	2-Hydroxyhippuric acid	C9 H9 N O4	No match	Invalid mass	No results	No results	No results	15.63	195.056	194.049	1.735	4.43776e+09	0	4	0	93.7	9.7			Endogenous Metabolites	C07588	Reference-529	No matches found	No matches found	DDA for preferred ion	[M-H]-1	2.61648e+09	1.94115e+09	9.2485e+08	8.70266e+08	8.29216e+08	9.31246e+08	2.07177e+09	1.43158e+09	1.76364e+09	1.93396e+09	1.0136e+09	1.02176e+09	1.08132e+09	2.26422e+09	1.64899e+09	2.19906e+09	1.36076e+09	1.35324e+09	9.22354e+08	1.89528e+09	1.19663e+09	4.43776e+09
	FALSE	Acamprosate	C5 H11 N O4 S	Full match	Full match	No results	No results	Full match	-1.38	181.041	180.033	2.185	4.42887e+09	3	2	0	97.6	9.9			Therapeutics/Prescription Drugs	D02780	Reference-986	No matches found	No matches found	DDA for preferred ion	[M-H]-1	1.72056e+09	9.30338e+08	7.18285e+08	9.37581e+08	7.04992e+08	8.47676e+08	1.39995e+09	1.39884e+09	1.7445e+09	1.67188e+09	1.17311e+09	9.60862e+08	5.93271e+08	1.59902e+09	1.03033e+09	1.47274e+09	8.5572e+08	8.18229e+08	8.4542e+08	1.11565e+09	1.08279e+09	4.42887e+09
	FALSE	Uracil	C4 H4 N2 O2	Full match	Full match	No results	Full match	Full match	-2.04	112.027	111.02	2.07	4.11985e+09	2	2	0	99.9	10			Endogenous Metabolites; Therapeutics/Prescription Drugs; Natural Products/Medicines; Pesticides/Herbicides	C00106	Reference-2531	No matches found	No matches found	DDA for preferred ion	[M-H]-1	1.74824e+09	3.31379e+09	1.84178e+09	2.21939e+09	2.25282e+09	2.38398e+09	2.27771e+09	2.89834e+09	1.81847e+09	3.03963e+09	2.76729e+09	2.72501e+09	2.5026e+09	2.16421e+09	2.90918e+09	2.74499e+09	1.75482e+09	2.24039e+09	2.70596e+09	4.11985e+09	2.43328e+09	1.72625e+09
	FALSE	Taurine	C2 H7 N O3 S	Full match	Full match	No results	Full match	Full match	-2.6	125.014	124.007	9.321	4.00335e+09	1	1	0	87.6	9.4			Endogenous Metabolites; Personal Care Products/Cosmetics; Excipients/Additives/Colorants	C00245	Reference-654	No matches found	No matches found	DDA for preferred ion	[M-H]-1	9.76989e+08	7.94189e+08	1.20615e+09	6.31198e+08	5.76213e+08	5.30788e+08	1.0993e+09	1.50893e+09	1.23244e+09	2.45997e+09	1.8341e+09	5.46685e+08	4.67946e+08	2.72095e+09	1.96131e+09	1.4902e+09	2.86136e+09	8.89323e+08	7.66457e+08	2.07769e+09	2.38324e+09	1.80075e+09
	FALSE	β-Muricholic acid	C24 H40 O5	Full match	Full match	No results	No results	Not the top hit	-1.34	408.287	407.28	5.702	3.94841e+09	20	5	0	99.6	10			Endogenous Metabolites		Autoprocessed-8518	No matches found	No matches found	DDA for preferred ion	[M-H]-1	2.14865e+09	1.90564e+09	1.96226e+09	2.26645e+09	2.07126e+09	1.66344e+09	1.47004e+09	2.213e+09	2.79046e+09	3.33822e+09	3.10112e+09	3.33187e+09	2.72442e+09	1.82504e+09	1.62826e+09	3.94841e+09	2.77532e+09	2.08187e+09	2.03831e+09	1.75284e+09	2.90892e+09	2.9693e+09
	FALSE	Valeric acid	C5 H10 O2	Full match	Full match	No results	No results	Partial match	-2.29	102.068	101.061	1.792	3.72784e+09	21	1	0	100	10			Endogenous Metabolites; Excipients/Additives/Colorants; Industrial Chemicals; Personal Care Products/Cosmetics	C00803	Reference-2530	No matches found	No matches found	DDA for preferred ion	[M-H]-1	1.11379e+09	1.30185e+09	4.51228e+08	8.56497e+08	7.91091e+08	5.98213e+08	8.54028e+08	7.68636e+08	1.01483e+09	2.27367e+09	3.24652e+09	1.208e+09	2.69544e+09	1.39369e+09	2.18485e+09	3.72784e+09	8.02266e+08	8.6243e+08	1.46973e+09	2.93767e+09	1.19128e+09	7.0267e+08
	FALSE	Isobutyric acid	C4 H8 O2	Full match	Full match	No results	Not the top hit	Partial match	-2.56	88.0522	87.0449	2.187	3.53928e+09	13	1	0	99.9	10			Extractables/Leachables; Excipients/Additives/Colorants; Industrial Chemicals; Endogenous Metabolites; Pesticides/Herbicides	C02632	Reference-2753	No matches found	No matches found	DDA for preferred ion	[M-H]-1	4.74357e+08	7.15484e+08	1.20622e+08	1.40231e+08	3.47957e+08	2.29332e+08	8.87863e+08	4.47194e+08	3.42485e+08	1.32106e+09	1.8725e+09	6.97176e+08	3.50007e+09	8.92773e+08	2.83364e+09	3.46626e+09	5.85541e+08	1.00383e+09	1.01046e+09	3.53928e+09	4.46142e+08	1.34405e+08
	FALSE	NP-020283	C29 H46 O6	No match	Invalid mass	No results	No results	No results	-36733.5	472.318	471.311	2.413	3.38507e+09	0	1	0	93	9.7			Endogenous Metabolites; Natural Products/Medicines		Autoprocessed-5746	No matches found	No matches found	DDA for preferred ion	[M-H]-1	5.42818e+08	2.91968e+08	5.09627e+08	7.15457e+08	6.1042e+08	4.97666e+08	3.9946e+08	6.23933e+08	7.22816e+08	2.64433e+08	3.56632e+08	2.61787e+08	2.38081e+08	2.12274e+08	2.43298e+08	1.81936e+08	3.44871e+08	1.62233e+08	2.59551e+08	2.23204e+08	3.66304e+08	4.75124e+08
	FALSE	Hydrocinnamic acid	C9 H10 O2	Full match	Full match	No results	Full match	Full match	-2.04	150.068	149.06	1.822	3.34988e+09	36	2	0	98.7	9.9			Personal Care Products/Cosmetics; Excipients/Additives/Colorants	C05629	Reference-1300	No matches found	No matches found	DDA for preferred ion	[M-H]-1	1.04506e+09	9.16942e+08	6.34705e+08	9.54476e+08	7.85437e+08	5.06945e+08	4.4452e+08	6.41339e+08	7.63812e+08	1.55162e+09	1.85441e+09	1.25492e+09	3.07965e+09	2.04506e+09	9.97892e+08	3.34988e+09	7.20995e+08	7.9117e+08	1.75754e+09	2.64538e+09	1.12492e+09	1.27011e+09
	FALSE	Octyl gallate	C15 H22 O5	Full match	Full match	No results	No results	Partial match	-1.5	282.146	281.139	2.445	3.16228e+09	10	4	0	90.4	9.5			Personal Care Products/Cosmetics; Excipients/Additives/Colorants		Reference-3154	No matches found	No matches found	DDA for preferred ion	[M-H]-1	8.60194e+08	8.45276e+08	8.26358e+08	8.63519e+08	7.52159e+08	7.76262e+08	6.00224e+08	1.08346e+09	9.1402e+08	7.19962e+08	9.74639e+08	8.45394e+08	6.5105e+08	7.04043e+08	7.68792e+08	8.841e+08	7.71587e+08	6.19211e+08	6.65818e+08	5.93141e+08	5.34506e+08	6.64499e+08
	FALSE	1-Chlorobenzotriazole	C6 H4 Cl N3	No match	Full match	No results	No match	No match	-0.37	153.009	152.002	3.35	3.10165e+09	3	2	0	90.5	9.5					Reference-3125	No matches found	No matches found	DDA for preferred ion	[M-H]-1	3.10165e+09	1.14725e+09	1.45039e+09	2.48663e+09	1.87811e+09	2.30224e+09	1.923e+09	1.33457e+09	1.67363e+09	1.72357e+09	8.40699e+08	5.01482e+08	1.85174e+09	2.46861e+09	2.80016e+09	1.64374e+09	1.44364e+09	2.68237e+09	5.59397e+08	6.24609e+08	1.00385e+09	2.2623e+09
	FALSE	DL-β-Leucine	C6 H13 N O2	No match	Invalid mass	No results	No results	No match	-350936	85.0888	130.087	8.493	3.07376e+09	1	1	0	99.7	10			Endogenous Metabolites	C02486	Reference-414	No matches found	No matches found	DDA for other ion	[M+FA-H]-1	6.62311e+08	1.06926e+09	8.12765e+08	1.04469e+09	1.02119e+09	8.41948e+08	9.42275e+08	9.17553e+08	4.63008e+08	1.35615e+09	1.30112e+09	7.03702e+08	6.91698e+08	1.39355e+09	1.26008e+09	1.36809e+09	5.1096e+08	1.71679e+09	1.115e+09	3.07376e+09	7.71661e+08	5.74271e+08
	FALSE	DL-β-Leucine	C6 H13 N O2	Full match	Full match	No results	Partial match	Not the top hit	-2.23	131.094	130.087	8.502	3.07376e+09	17	1	0	99.7	10			Endogenous Metabolites	C02486	Reference-414	No matches found	No matches found	DDA for preferred ion	[M-H]-1	6.62311e+08	1.06926e+09	8.12765e+08	1.04469e+09	1.02119e+09	8.41948e+08	9.42275e+08	9.17553e+08	4.63008e+08	1.35615e+09	1.30112e+09	7.03702e+08	6.91698e+08	1.39355e+09	1.26008e+09	1.36809e+09	5.1096e+08	1.71679e+09	1.115e+09	3.07376e+09	7.71661e+08	5.74271e+08
	FALSE	Dodecyl sulfate	C12 H26 O4 S	Full match	Full match	No results	No results	No results	-1.28	266.155	265.148	0.769	2.65482e+09	0	5	0	100	10			Personal Care Products/Cosmetics	C08031	Reference-1348	No matches found	No matches found	DDA for preferred ion	[M-H]-1	3.22703e+07	3.25785e+07	3.25685e+07	3.32859e+07	3.04653e+07	3.53401e+07	2.81569e+07	2.79037e+07	3.09296e+07	3.55377e+07	2.84305e+07	3.27878e+07	2.90564e+07	3.04812e+07	2.88369e+07	2.71042e+07	3.64956e+07	2.7595e+07	5.56491e+06	5.10017e+06	4.78946e+06	7.91073e+06
	FALSE	NP-008607	C28 H46 O7	No match	Invalid mass	No results	No results	No match	72758.2	530.29	529.283	4.755	2.47927e+09	2	1	0	91.1	9.6			Endogenous Metabolites; Natural Products/Medicines		Autoprocessed-7707	No matches found	No matches found	DDA for preferred ion	[M-H]-1	6.63842e+08	1.30233e+09	5.51357e+08	4.68886e+08	3.78533e+08	9.25523e+08	3.21236e+08	5.92647e+08	7.92376e+08	1.23716e+09	1.29406e+09	1.10251e+09	3.48693e+08	5.97252e+08	7.98756e+08	5.74581e+08	7.00734e+08	4.06941e+08	6.51406e+08	7.39854e+08	5.29554e+08	7.54136e+08
	FALSE	2-Aminoflubendazole	C14 H10 F N3 O	No match	Invalid mass	No results	No results	No results	-13.71	255.077	254.07	3.248	2.36544e+09	0	3	0	90.6	9.5			Therapeutics/Prescription Drugs		Reference-4907	No matches found	No matches found	DDA for preferred ion	[M-H]-1	8.50738e+08	2.59696e+08	3.44815e+08	5.00131e+08	4.26912e+08	3.36831e+08	5.04084e+08	8.24281e+08	1.08674e+09	5.22905e+08	2.27123e+08	8.6673e+08	3.14998e+08	5.03121e+08	3.27078e+08	2.80314e+08	6.75253e+08	6.06332e+08	6.00381e+08	2.45754e+08	3.2145e+08	2.36544e+09
	FALSE	1-Methyl-3,6-(1H,2H)-pyridazinedione	C5 H6 N2 O2	Full match	Full match	No results	Partial match	Partial match	-2.11	126.043	125.035	1.818	2.33678e+09	3	2	0	92.9	9.6					Reference-2558	No matches found	No matches found	DDA for preferred ion	[M-H]-1	5.39833e+08	2.05104e+09	6.91123e+08	6.83096e+08	9.43861e+08	1.06944e+09	9.15434e+08	1.02322e+09	5.99576e+08	1.35774e+09	1.50894e+09	1.10081e+09	9.77752e+08	1.02024e+09	1.29751e+09	9.46531e+08	5.90982e+08	9.01336e+08	1.11507e+09	2.33678e+09	1.22338e+09	5.89954e+08
	FALSE	DL-β-Leucine	C6 H13 N O2	Full match	Full match	No results	Partial match	Not the top hit	-2.21	131.094	130.087	8.814	2.05021e+09	17	1	0	99.6	10			Endogenous Metabolites	C02486	Reference-414	No matches found	No matches found	DDA for preferred ion	[M-H]-1	5.65e+08	8.68488e+08	6.55152e+08	8.7794e+08	8.29923e+08	6.86477e+08	6.916e+08	7.95556e+08	4.06014e+08	1.0869e+09	9.46863e+08	5.96717e+08	5.55008e+08	9.91838e+08	9.31623e+08	1.16094e+09	4.00275e+08	1.29021e+09	9.77644e+08	2.05021e+09	6.30467e+08	5.37516e+08
	FALSE	β-Muricholic acid	C24 H40 O5	Full match	Full match	No results	No results	Not the top hit	-0.78	408.287	407.28	6.465	2.03004e+09	20	5	0	99.3	10			Endogenous Metabolites		Autoprocessed-8518	No matches found	No matches found	DDA for preferred ion	[M-H]-1	1.01047e+09	2.23105e+08	3.06392e+08	3.23782e+08	2.91743e+08	1.7498e+08	5.11207e+08	6.67861e+08	7.15509e+08	1.29332e+09	6.54329e+08	7.4459e+08	1.91178e+08	7.19231e+08	4.05893e+08	4.12768e+08	1.44063e+09	2.44088e+08	4.15935e+08	9.13719e+08	1.41133e+09	4.82052e+08
	FALSE	Pentadecanoic acid	C15 H30 O2	Full match	Full match	No results	No results	Full match	-1.31	242.224	241.217	1.108	1.85263e+09	14	2	0	99.4	10			Endogenous Metabolites		Autoprocessed-8571	No matches found	No matches found	DDA for preferred ion	[M-H]-1	8.25159e+08	1.52284e+09	8.4611e+08	8.41616e+08	9.69975e+08	8.71867e+08	6.15121e+08	9.13183e+08	9.82142e+08	8.10821e+08	1.24465e+09	1.08956e+09	1.13685e+09	8.05884e+08	6.59042e+08	8.45415e+08	8.21756e+08	7.98884e+08	1.04316e+09	1.15747e+09	1.27319e+09	1.85263e+09
	FALSE	Ferulic acid	C10 H10 O4	Full match	Full match	No results	Full match	Full match	-2.37	194.057	193.05	3.049	1.80632e+09	30	3	0	96.8	90.7	60.4		Endogenous Metabolites; Excipients/Additives/Colorants	C01494	Reference-421	No matches found	No matches found	DDA for preferred ion	[M-H]-1	3.3785e+08	4.68463e+08	6.65407e+08	7.98721e+08	7.39273e+08	7.02708e+08	7.31165e+08	6.11285e+08	2.87955e+08	5.39579e+08	4.81876e+08	3.24366e+08	5.3308e+08	1.73072e+09	1.80632e+09	9.04509e+08	5.26744e+08	1.08564e+09	7.28168e+08	9.41243e+08	3.63421e+08	3.82055e+08
	FALSE	Nicotinic acid	C6 H5 N O2	Full match	Full match	No results	Full match	Full match	-1.59	123.032	122.025	6.328	1.7668e+09	5	3	0	98.8	9.9			Endogenous Metabolites	C00253	Reference-519	No matches found	No matches found	DDA for preferred ion	[M-H]-1	8.02241e+08	1.7668e+09	6.0853e+08	7.68063e+08	6.92139e+08	6.59528e+08	5.84068e+08	8.57742e+08	7.55084e+08	9.90378e+08	1.54426e+09	1.25612e+09	1.14876e+09	8.0766e+08	7.29523e+08	1.72886e+09	9.8397e+08	9.31277e+08	8.54127e+08	1.3234e+09	1.27016e+09	1.36935e+09
	FALSE	β-Muricholic acid	C24 H40 O5	Full match	Full match	No results	No results	Not the top hit	-1.79	408.287	407.28	4.783	1.76297e+09	20	5	0	98.8	9.9			Endogenous Metabolites		Autoprocessed-8518	No matches found	No matches found	DDA for preferred ion	[M-H]-1	7.94913e+08	5.58838e+08	7.24225e+08	7.01105e+08	6.149e+08	4.88663e+08	6.38166e+08	8.46042e+08	1.16456e+09	1.60488e+09	7.28958e+08	1.31749e+09	5.73404e+08	6.64485e+08	6.79999e+08	8.82829e+08	1.41134e+09	6.08173e+08	6.36927e+08	6.91627e+08	1.04281e+09	8.96319e+08
	FALSE	4-Acetamidobenzoic acid	C9 H9 N O3	Full match	Full match	No results	Partial match	Partial match	-1.72	179.058	178.051	5.398	1.73968e+09	7	5	0	93.9	59.6	65.2			D03836	Reference-1744	No matches found	No matches found	DDA for preferred ion	[M-H]-1	3.96714e+07	4.43079e+07	2.2791e+07	1.88994e+07	1.48415e+07	3.26408e+07	1.12706e+07	1.09016e+07	1.7883e+07	2.91077e+07	5.53961e+07	6.49964e+06	1.81895e+07	8.62918e+07	1.87917e+08	1.73968e+09	1.43504e+07	4.50742e+07	1.51355e+07	2.04358e+07	2.82989e+07	2.30281e+07
	FALSE	L-Phenylalanine	C9 H11 N O2	No match	Invalid mass	Invalid mass	No results	No results	-278689	119.073	164.071	8.411	1.67727e+09	0	2	2	99.4	100		97.4	Endogenous Metabolites	C00079	Reference-8	Single match found	Single match found	DDA for other ion	[M+FA-H]-1	2.73324e+08	4.79756e+08	3.34086e+08	4.56851e+08	4.37881e+08	3.54603e+08	4.26583e+08	3.53895e+08	1.90298e+08	5.86872e+08	5.94867e+08	2.79799e+08	3.01445e+08	6.8893e+08	6.17372e+08	5.91304e+08	2.6345e+08	8.74023e+08	4.84867e+08	1.67727e+09	3.66119e+08	2.48438e+08
	FALSE	L-Phenylalanine	C9 H11 N O2	Full match	Full match	Full match	Full match	Full match	-1.34	165.079	164.071	8.414	1.67727e+09	14	2	2	99.4	100		97.4	Endogenous Metabolites	C00079	Reference-8	Single match found	Single match found	DDA for preferred ion	[M-H]-1	2.73324e+08	4.79756e+08	3.34086e+08	4.56851e+08	4.37881e+08	3.54603e+08	4.26583e+08	3.53895e+08	1.90298e+08	5.86872e+08	5.94867e+08	2.79799e+08	3.01445e+08	6.8893e+08	6.17372e+08	5.91304e+08	2.6345e+08	8.74023e+08	4.84867e+08	1.67727e+09	3.66119e+08	2.48438e+08
	FALSE	β-Muricholic acid	C24 H40 O5	Full match	Full match	No results	No results	Not the top hit	-1.06	408.287	407.28	5.361	1.62331e+09	20	5	0	99.7	10			Endogenous Metabolites		Autoprocessed-8518	No matches found	No matches found	DDA for preferred ion	[M-H]-1	8.97784e+08	8.54683e+08	9.7418e+08	8.43777e+08	8.15094e+08	6.29206e+08	4.54596e+08	9.23372e+08	1.18662e+09	1.48949e+09	1.25766e+09	1.51507e+09	1.06328e+09	6.59e+08	5.20668e+08	1.48899e+09	1.35072e+09	1.03982e+09	8.86591e+08	7.68337e+08	1.40126e+09	1.45652e+09
	FALSE	3-Hydroxybutyric acid	C4 H8 O3	Full match	Full match	No results	No results	Not the top hit	-2.03	104.047	103.04	6.07	1.61975e+09	13	1	0	99.8	10			Endogenous Metabolites		Reference-199	No matches found	No matches found	DDA for preferred ion	[M-H]-1	6.74505e+07	4.37433e+08	4.73962e+07	3.70721e+07	4.89444e+07	4.81997e+07	1.55288e+08	1.48728e+08	5.18597e+07	1.03543e+08	8.95464e+08	4.27544e+08	1.61975e+09	4.86872e+08	3.22494e+08	1.59664e+09	6.64267e+07	4.31084e+08	5.46131e+08	3.79562e+08	8.23606e+08	3.6181e+07
	FALSE	NP-008607	C28 H46 O7	No match	Invalid mass	No results	No results	No match	72757.8	530.29	529.283	4.525	1.59692e+09	2	1	0	92.3	9.6			Endogenous Metabolites; Natural Products/Medicines		Autoprocessed-7707	No matches found	No matches found	DDA for preferred ion	[M-H]-1	7.77017e+08	8.68657e+08	6.12937e+08	5.41082e+08	4.96807e+08	5.05856e+08	4.36892e+08	7.59527e+08	7.74858e+08	1.18367e+09	8.73004e+08	1.39337e+09	3.62037e+08	7.53023e+08	5.04116e+08	5.45855e+08	5.80142e+08	4.92706e+08	9.30037e+08	1.11641e+09	5.58539e+08	1.12669e+09
	FALSE	NP-020283	C29 H46 O6	No match	Invalid mass	No results	No results	No results	-36733.8	472.318	471.31	2.144	1.58899e+09	0	1	0	93	9.7			Endogenous Metabolites; Natural Products/Medicines		Autoprocessed-5746	No matches found	No matches found	DDA for preferred ion	[M-H]-1	4.46299e+08	2.30718e+08	5.32628e+08	6.99812e+08	6.00846e+08	4.70891e+08	2.89209e+08	5.9899e+08	5.24223e+08	2.38117e+08	3.03498e+08	3.72056e+08	2.22679e+08	1.89154e+08	2.25778e+08	3.46013e+08	3.27006e+08	2.29459e+08	4.1955e+08	3.67377e+08	5.74829e+08	7.12952e+08
	FALSE	Linoleic Acid	C18 H32 O2	Full match	Full match	No results	Full match	Full match	-2.07	280.24	279.232	2.43	1.53931e+09	12	4	0	99.1	10			Endogenous Metabolites		Autoprocessed-8545	No matches found	No matches found	DDA for preferred ion	[M-H]-1	2.34446e+08	1.45161e+08	1.88059e+08	1.87419e+08	2.53718e+08	1.93699e+08	5.48742e+08	2.95782e+08	2.53643e+08	1.96391e+08	4.23169e+08	3.56294e+08	2.87912e+08	6.12313e+08	4.60363e+08	4.63075e+08	3.70535e+08	4.08633e+08	4.26293e+08	3.79038e+08	2.46461e+08	2.61298e+08
	FALSE	Adenine	C5 H5 N5	Full match	Full match	No results	Full match	Partial match	-1.65	135.054	134.047	4.37	1.49292e+09	2	1	0	97.1	9.9			Endogenous Metabolites	C00147	Reference-296	No matches found	No matches found	DDA for preferred ion	[M-H]-1	1.0625e+09	9.22441e+08	9.1751e+08	9.29397e+08	8.21582e+08	6.66955e+08	7.33648e+08	8.66412e+08	1.00716e+09	8.32967e+08	3.75357e+08	4.66057e+08	7.69144e+08	4.92113e+08	8.95969e+08	5.24192e+08	4.95034e+08	6.57249e+08	4.1757e+08	3.24902e+08	5.76793e+08	7.46394e+08
	FALSE	5-Aminovaleric acid	C5 H11 N O2	Full match	Full match	Partial match	Full match	Partial match	-1.92	117.079	116.071	9.578	1.46906e+09	13	1	1	99.4	10		71.1	Endogenous Metabolites	C00431	Reference-251	Single match found	No matches found	DDA for preferred ion	[M-H]-1	3.99632e+08	6.28764e+08	4.46079e+08	6.00773e+08	5.31594e+08	4.69694e+08	4.63862e+08	5.2223e+08	2.69633e+08	7.45536e+08	7.5731e+08	4.20254e+08	4.61995e+08	8.28061e+08	7.58907e+08	9.12241e+08	3.42317e+08	1.00972e+09	6.57082e+08	1.46906e+09	4.63623e+08	3.95719e+08
	FALSE	Dodecanedioic acid	C12 H22 O4	Full match	Full match	No results	No results	Full match	-1.7	230.151	229.144	6	1.32811e+09	4	1	0	96.5	9.8			Endogenous Metabolites	C02678	Reference-1182	No matches found	No matches found	DDA for preferred ion	[M-H]-1	7.40924e+08	7.67303e+08	6.01265e+08	7.16797e+08	6.4228e+08	5.30452e+08	5.38882e+08	5.60915e+08	6.86246e+08	5.45867e+08	8.6638e+08	5.99044e+08	1.03058e+09	7.39988e+08	4.70723e+08	1.32811e+09	5.75873e+08	6.67344e+08	6.14399e+08	4.89643e+08	5.99252e+08	6.85433e+08
	FALSE	Methanesulfonic acid	C H4 O3 S	No results	Full match	No results	No results	Full match	-2.12	95.9879	94.9806	2.295	1.26208e+09	2	1	0	89.4	9.5			Industrial Chemicals	C08091	Reference-1324	No matches found	No matches found	DDA for preferred ion	[M-H]-1	6.37271e+08	4.15859e+08	4.05746e+08	7.71813e+08	4.76772e+08	2.29383e+08	1.92256e+08	2.62261e+08	4.82955e+08	3.62751e+08	5.04301e+08	1.74531e+08	9.46649e+08	6.07312e+08	6.03523e+08	1.26208e+09	3.76506e+08	2.64358e+08	4.09897e+08	5.64519e+08	2.3502e+08	6.83569e+08
	FALSE	1-[4-hydroxy-5-(hydroxymethyl)tetrahydrofuran-2-yl]pyrimidine-2,4(1H,3H)-dione	C9 H12 N2 O5	Full match	Full match	No results	Full match	Full match	-1.42	228.074	227.067	2.634	1.22654e+09	3	2	0	95.7	100	57.6				Autoprocessed-368	No matches found	No matches found	DDA for preferred ion	[M-H]-1	4.63457e+08	8.00648e+08	9.32891e+08	7.21017e+08	1.04846e+09	9.75334e+08	6.76141e+08	6.0502e+08	1.58968e+08	5.00096e+08	6.6924e+08	3.70458e+08	3.75882e+08	4.18159e+08	7.04882e+08	3.16873e+08	2.54114e+08	4.46894e+08	1.02779e+09	1.22654e+09	6.95033e+08	3.97308e+08
	FALSE	1,5-Isoquinolinediol	C9 H7 N O2	No results	Full match	No results	Partial match	Partial match	-2.25	161.047	160.04	1.865	1.1077e+09	11	5	0	99	9.9	61.3		Therapeutics/Prescription Drugs		Reference-2549	No matches found	No matches found	DDA for preferred ion	[M-H]-1	2.96236e+08	3.48105e+08	2.55097e+08	2.63905e+08	2.54403e+08	1.46389e+08	3.30772e+08	1.27992e+08	1.5514e+08	6.69011e+07	9.50123e+07	9.86088e+07	3.80771e+08	1.1077e+09	1.79533e+08	2.76323e+08	1.93798e+08	2.7276e+08	1.04289e+08	1.12329e+08	8.96948e+07	2.39693e+08
	FALSE	Myristic acid	C14 H28 O2	Full match	Full match	No results	No results	Full match	-1.62	228.209	227.201	1.111	9.55559e+08	14	2	0	98.9	9.9			Endogenous Metabolites		Autoprocessed-8507	No matches found	No matches found	DDA for preferred ion	[M-H]-1	2.07851e+08	9.55559e+08	3.2193e+08	3.08226e+08	3.49165e+08	2.36937e+08	3.25668e+08	2.92963e+08	3.60058e+08	3.99239e+08	6.34643e+08	5.41515e+08	5.75118e+08	4.18625e+08	3.03602e+08	6.26633e+08	4.04962e+08	4.54387e+08	4.49934e+08	5.28301e+08	6.0044e+08	5.29982e+08
	FALSE	Indole-2-carboxylic acid	C9 H7 N O2	Full match	Full match	No results	Partial match	Not the top hit	-2.07	161.047	160.04	1.631	8.77855e+08	11	5	0	98.6	9.9	61.3		Endogenous Metabolites		Reference-1302	No matches found	No matches found	DDA for preferred ion	[M-H]-1	2.1785e+08	4.16172e+08	2.20408e+08	1.84103e+08	3.13984e+08	2.54369e+08	2.15918e+08	1.73148e+08	1.2438e+08	5.491e+08	2.0796e+08	7.61569e+08	8.77855e+08	1.79321e+08	1.77561e+08	4.95327e+08	1.69752e+08	2.72905e+08	2.1151e+08	2.41096e+08	3.08113e+08	6.48803e+07
	FALSE	NP-020283	C29 H46 O6	No match	Invalid mass	No results	No results	No results	-36733.4	472.318	471.311	2.925	8.69448e+08	0	1	0	88.4	9.4			Endogenous Metabolites; Natural Products/Medicines		Autoprocessed-5746	No matches found	No matches found	DDA for preferred ion	[M-H]-1	7.29893e+08	3.97501e+08	5.6871e+08	5.05848e+08	4.52504e+08	4.4684e+08	3.36049e+08	5.35679e+08	7.28604e+08	5.67957e+08	3.27795e+08	4.62129e+08	3.70139e+08	2.41677e+08	2.548e+08	1.88303e+08	4.42928e+08	2.25817e+08	3.0541e+08	3.15782e+08	4.61635e+08	4.82361e+08
	FALSE	NP-011548	C18 H34 O3	No results	Full match	No results	No results	Partial match	-1.19	298.25	297.243	1.381	8.60602e+08	8	1	0	98.2	9.9			Endogenous Metabolites; Natural Products/Medicines		Autoprocessed-6496	No matches found	No matches found	DDA for preferred ion	[M-H]-1	6.04582e+08	6.55684e+08	3.08455e+08	4.36237e+08	4.45738e+08	4.04518e+08	3.88032e+08	3.9896e+08	6.01407e+08	4.21438e+08	5.27975e+08	5.43123e+08	5.63925e+08	4.10009e+08	2.81345e+08	5.83745e+08	3.60904e+08	4.19999e+08	4.00826e+08	5.88866e+08	5.23186e+08	7.01595e+08
	FALSE	4-Methylphenol	C7 H8 O	Full match	Full match	No results	Not the top hit	Full match	-2.09	108.057	107.05	4.785	7.76549e+08	6	1	0	99.8	10			Endogenous Metabolites; Industrial Chemicals; Therapeutics/Prescription Drugs; Natural Products/Medicines; Excipients/Additives/Colorants; Textile Chemicals/Auxiliary/Dyes	C01468	Reference-3199	No matches found	No matches found	DDA for preferred ion	[M-H]-1	5.25872e+08	5.08147e+08	6.38626e+08	5.41508e+08	3.99543e+08	2.5538e+08	2.36692e+08	2.7828e+08	4.68871e+08	2.74764e+08	3.50946e+08	1.24713e+08	3.73857e+08	7.76549e+08	5.52645e+08	6.71497e+08	3.85236e+08	2.59705e+08	2.44431e+08	3.24335e+08	3.51727e+08	3.95821e+08
	FALSE	(15Z)-9,12,13-Trihydroxy-15-octadecenoic acid	C18 H34 O5	Full match	Full match	No results	No results	Partial match	-1.64	330.24	329.233	2.758	7.54917e+08	5	1	0	86.4	50.4					Reference-7727	No matches found	No matches found	DDA for preferred ion	[M-H]-1	2.43395e+08	1.90952e+08	1.90092e+08	3.22505e+08	2.60664e+08	2.24415e+08	4.28303e+08	2.03706e+08	2.0051e+08	1.69436e+08	2.18501e+08	2.13873e+08	3.01574e+08	2.34431e+08	2.92216e+08	2.96838e+08	2.68469e+08	3.03975e+08	2.27322e+08	2.1923e+08	1.60622e+08	1.96565e+08
	FALSE	α-Eleostearic acid	C18 H30 O2	Full match	Full match	No results	Partial match	Not the top hit	-1.98	278.224	277.217	1.104	7.5349e+08	6	6	0	99.2	10				C08315	Reference-6594	No matches found	No matches found	DDA for preferred ion	[M-H]-1	5.43382e+08	5.0936e+08	4.00535e+08	5.20949e+08	5.45124e+08	5.28032e+08	6.99419e+08	4.57923e+08	4.81198e+08	2.5399e+08	3.68903e+08	3.80491e+08	5.38889e+08	6.39771e+08	5.65507e+08	6.43124e+08	5.02952e+08	6.15597e+08	4.57228e+08	4.2579e+08	3.30764e+08	4.04854e+08
	FALSE	D(+)-Phenyllactic acid	C9 H10 O3	Full match	Full match	No results	Partial match	Partial match	-2.27	166.063	165.055	2.236	7.38299e+08	43	3	0	94.5	82.8			Endogenous Metabolites	C05607	Reference-3080	No matches found	No matches found	DDA for preferred ion	[M-H]-1	6.94766e+07	9.92462e+07	8.87005e+07	1.57827e+08	1.40304e+08	9.8679e+07	1.58426e+08	1.65141e+08	5.24467e+07	1.79022e+08	1.04575e+08	5.87403e+07	3.31739e+08	6.63815e+08	5.00055e+08	1.18864e+08	1.08962e+08	7.38299e+08	6.45772e+07	3.52039e+08	6.74986e+07	5.10381e+07
	FALSE	1,5-Isoquinolinediol	C9 H7 N O2	Full match	Full match	No results	Partial match	Partial match	-2.13	161.047	160.04	2.159	7.34066e+08	11	3	0	99	9.9			Therapeutics/Prescription Drugs		Reference-2549	No matches found	No matches found	DDA for preferred ion	[M-H]-1	4.62953e+08	6.20898e+08	4.95689e+08	4.78822e+08	4.9343e+08	2.8315e+08	5.30489e+08	4.6556e+08	4.80387e+08	3.40765e+08	5.81002e+08	4.53636e+08	7.34066e+08	5.43722e+08	4.70954e+08	7.12533e+08	5.20805e+08	5.42376e+08	4.71113e+08	6.0842e+08	5.90175e+08	3.63606e+08
	FALSE	6-(methylsulfanyl)-9H-purine	C6 H6 N4 S	No match	Invalid mass	No results	No results	No match	-10.58	166.03	165.022	2.847	7.11931e+08	1	2	0	91.3	9.6					Autoprocessed-6974	No matches found	No matches found	DDA for preferred ion	[M-H]-1	6.6706e+08	6.23974e+08	3.94155e+08	5.65733e+08	5.80299e+08	4.68246e+08	1.76607e+08	3.01146e+08	4.48261e+08	2.45312e+08	3.50781e+08	3.75585e+08	4.74864e+08	3.90997e+08	3.12874e+08	4.86303e+08	6.19357e+08	5.29241e+08	3.56145e+08	4.18074e+08	4.9328e+08	3.4373e+08
	FALSE	NP-011548	C18 H34 O3	Full match	Full match	No results	No results	Partial match	-1.51	298.25	297.243	1.104	7.07675e+08	8	1	0	98.2	9.9			Endogenous Metabolites; Natural Products/Medicines		Autoprocessed-6496	No matches found	No matches found	DDA for preferred ion	[M-H]-1	3.86938e+08	6.87479e+08	2.2153e+08	3.26177e+08	3.45117e+08	3.20832e+08	3.65381e+08	3.3436e+08	4.62465e+08	5.16487e+08	5.98709e+08	6.67771e+08	3.90012e+08	2.8279e+08	2.27801e+08	4.45576e+08	2.48312e+08	4.30764e+08	3.27334e+08	4.47837e+08	5.19583e+08	4.97549e+08
	FALSE	D-(-)-Arabinose	C5 H10 O5	Full match	Full match	No results	Not the top hit	Not the top hit	-2.44	150.052	149.045	5.798	6.83152e+08	46	4	0	97.9	9.9			Endogenous Metabolites; Excipients/Additives/Colorants	C00216	Reference-6206	No matches found	No matches found	DDA for preferred ion	[M-H]-1	1.19348e+08	1.87311e+08	2.13284e+08	2.32264e+08	2.29992e+08	4.17571e+08	4.10867e+08	2.44177e+08	9.7199e+07	1.82899e+08	2.33741e+08	1.69061e+08	1.53702e+08	2.0559e+08	3.95969e+08	2.58166e+08	1.54475e+08	3.16678e+08	1.54086e+08	6.83152e+08	1.25703e+08	1.1137e+08
	FALSE	D(+)-Phenyllactic acid	C9 H10 O3	Full match	Full match	No results	Partial match	Partial match	-2.59	166.063	165.055	2.403	6.63815e+08	43	8	0	94.5	82.8	54.6		Endogenous Metabolites	C05607	Reference-3080	No matches found	No matches found	DDA for preferred ion	[M-H]-1	5.3765e+07	9.92462e+07	6.12733e+07	1.28282e+08	1.11572e+08	9.44951e+07	1.59232e+08	1.10988e+08	3.5774e+07	1.26846e+08	8.25969e+07	2.64572e+07	2.54347e+08	6.63815e+08	3.42e+08	2.33332e+08	1.12903e+08	3.4852e+08	5.92856e+07	2.44835e+08	5.0316e+07	4.02877e+07
	FALSE	D-(-)-Arabinose	C5 H10 O5	Full match	Full match	No results	Not the top hit	Not the top hit	-2.44	150.052	149.045	5.594	6.40903e+08	46	4	0	97.9	9.9			Endogenous Metabolites; Excipients/Additives/Colorants	C00216	Reference-6206	No matches found	No matches found	DDA for preferred ion	[M-H]-1	8.49242e+07	1.44044e+08	1.54149e+08	1.49351e+08	1.49709e+08	3.94148e+08	6.40903e+08	1.56802e+08	6.51917e+07	1.388e+08	1.58233e+08	1.39301e+08	1.21097e+08	2.63835e+08	6.33542e+08	1.58485e+08	1.03427e+08	2.34596e+08	1.85513e+08	6.24249e+08	8.98721e+07	7.56223e+07
	FALSE	Orotic acid	C5 H4 N2 O4	Full match	Full match	No results	Full match	Full match	-1.81	156.017	155.01	6.023	6.28364e+08	1	1	0	82.6	9.1			Endogenous Metabolites	C00295	Reference-532	No matches found	No matches found	DDA for preferred ion	[M-H]-1	7.53001e+07	6.28364e+08	6.34751e+07	2.10314e+08	7.36335e+07	8.23627e+07	5.68054e+07	8.60494e+07	5.09939e+07	1.78459e+08	4.2242e+08	2.36899e+08	854497	1.851e+08	2.26182e+08	3.28117e+08	1.06451e+08	1.1294e+08	7.19444e+07	4.53284e+08	1.48594e+08	6.08174e+07
	FALSE	Benzoic acid	C7 H6 O2	Full match	Full match	No results	Full match	Full match	-2.13	122.037	121.029	4.784	6.20536e+08	7	2	0	99.3	10			Industrial Chemicals; Excipients/Additives/Colorants; Endogenous Metabolites	C00180	Reference-332	No matches found	No matches found	DDA for preferred ion	[M-H]-1	4.00978e+08	4.20962e+08	4.83852e+08	4.18337e+08	3.33985e+08	2.40655e+08	2.29736e+08	2.7744e+08	3.56628e+08	2.58094e+08	3.4695e+08	1.40412e+08	3.3985e+08	5.8316e+08	4.64458e+08	6.20536e+08	3.01734e+08	2.4428e+08	2.50977e+08	3.75667e+08	2.8253e+08	3.40628e+08
	FALSE	Δ2-cis-Hexadecenoic acid	C16 H30 O2	Full match	Full match	No results	Partial match	Partial match	-1.82	254.224	253.217	1.108	6.15369e+08	16	6	0	99.2	10					Reference-6707	No matches found	No matches found	DDA for preferred ion	[M-H]-1	4.11118e+08	5.53384e+08	3.10305e+08	3.35507e+08	3.88249e+08	4.04931e+08	3.74545e+08	3.94386e+08	4.60154e+08	4.3443e+08	5.64049e+08	5.3915e+08	5.26481e+08	4.07135e+08	3.80297e+08	6.15369e+08	3.89546e+08	4.73845e+08	4.48328e+08	4.43443e+08	4.97359e+08	4.89946e+08
	FALSE	Oleic acid	C18 H34 O2	No match	Invalid mass	No results	No results	No match	63807.5	300.266	299.259	1.078	5.9128e+08	12	3	0	99.9	10			Endogenous Metabolites; Extractables/Leachables; Excipients/Additives/Colorants; Personal Care Products/Cosmetics; Industrial Chemicals	C00712	Reference-10	No matches found	No matches found	DDA for other ion	[M-H]-1	6.20351e+07	2.76177e+08	5.22907e+07	5.69926e+07	7.57974e+07	1.4304e+08	7.21224e+07	1.26469e+08	2.2311e+08	2.20908e+08	3.2629e+08	5.9128e+08	1.36203e+08	5.38493e+07	4.15102e+07	1.42738e+08	1.28444e+08	2.70384e+08	9.46402e+07	1.82126e+08	3.55961e+08	2.0738e+08
	FALSE	Lithocholic Acid	C24 H40 O3	Full match	Full match	No results	No results	Full match	-1.72	376.297	375.29	1.571	5.85699e+08	6	3	0	98.9	9.9			Endogenous Metabolites		Autoprocessed-8555	No matches found	No matches found	DDA for preferred ion	[M-H]-1	2.40451e+08	5.17027e+08	4.04004e+08	3.58537e+08	4.33998e+08	3.81863e+08	3.08446e+08	3.72153e+08	4.41381e+08	4.12256e+08	4.16867e+08	5.85699e+08	4.454e+08	2.14474e+08	2.59959e+08	5.15146e+08	3.76081e+08	3.71889e+08	2.77811e+08	2.46985e+08	3.38283e+08	2.66449e+08
	FALSE	NP-003039	C30 H46 O5	Full match	Full match	No results	No results	Partial match	-2.01	486.334	485.326	2.406	5.81016e+08	8	2	0	86.4	9.3			Endogenous Metabolites; Natural Products/Medicines		Autoprocessed-7990	No matches found	No matches found	DDA for preferred ion	[M-H]-1	7.54352e+07	2.5888e+07	8.8954e+07	6.36003e+07	6.38797e+07	7.50541e+07	1.74149e+08	7.77125e+07	5.71358e+07	5.08063e+07	2.87851e+07	2.80296e+07	5.12548e+07	5.58668e+07	8.26823e+07	1.44616e+07	4.56511e+07	6.48751e+07	5.05564e+07	5.51798e+07	1.80654e+07	7.207e+07
	FALSE	L-Tyrosine	C9 H11 N O3	Full match	Full match	Full match	Full match	Full match	-1.45	181.074	180.066	9.871	5.67403e+08	16	5	2	99.2	100	65.2	95.7	Endogenous Metabolites; Excipients/Additives/Colorants; Therapeutics/Prescription Drugs; Natural Products/Medicines	C00082	Reference-2255	Single match found	Single match found	DDA for preferred ion	[M-H]-1	9.61102e+07	1.9402e+08	1.18011e+08	1.37976e+08	1.50876e+08	1.17463e+08	1.48443e+08	1.36204e+08	6.90217e+07	1.78813e+08	2.09508e+08	1.11822e+08	1.02755e+08	2.22261e+08	1.76596e+08	2.4885e+08	1.05623e+08	2.17505e+08	1.73351e+08	5.67403e+08	1.2662e+08	1.14923e+08
	FALSE	DL-Alanine	C3 H7 N O2	Full match	Full match	No results	Full match	Full match	-2.11	89.0475	88.0402	11.119	5.67156e+08	9	2	0	99.7	10			Endogenous Metabolites	C01401	Reference-826	No matches found	No matches found	DDA for preferred ion	[M-H]-1	1.25512e+08	2.63184e+08	1.46587e+08	1.57648e+08	1.53484e+08	1.62414e+08	1.48998e+08	1.81015e+08	7.90173e+07	2.41857e+08	3.06216e+08	1.50509e+08	1.67947e+08	3.34957e+08	3.45111e+08	4.00524e+08	1.37462e+08	3.75368e+08	2.24235e+08	5.67156e+08	1.87039e+08	1.64017e+08
	FALSE	1-Dodecanesulfonic acid	C12 H26 O3 S	No match	Invalid mass	No results	No match	No match	-14.46	250.157	249.149	0.974	5.4698e+08	27	7	0	94.5	9.7					Reference-1722	No matches found	No matches found	DDA for preferred ion	[M-H]-1	5.00625e+08	3.67893e+08	3.70623e+08	4.32446e+08	3.76152e+08	4.11144e+08	3.82656e+08	5.4698e+08	5.46659e+08	3.82131e+08	4.03074e+08	4.36563e+08	4.15712e+08	4.10957e+08	4.49571e+08	4.37927e+08	5.20866e+08	4.38482e+08	4.38205e+08	3.74311e+08	4.18808e+08	4.47062e+08
	FALSE	6-Hydroxycaproic acid	C6 H12 O3	Full match	Full match	No results	No results	Partial match	-1.96	132.078	131.071	3.84	5.45999e+08	20	3	0	97	9.8			Endogenous Metabolites	C06103	Reference-1203	No matches found	No matches found	DDA for preferred ion	[M-H]-1	3.48674e+07	4.29487e+07	3.50056e+07	4.82428e+07	3.69446e+07	5.72608e+07	4.36134e+07	2.72607e+07	1.97661e+07	4.23188e+07	8.35408e+07	2.86232e+07	1.51684e+08	2.31416e+08	2.24561e+08	5.83247e+07	7.19583e+07	5.45999e+08	3.80201e+07	9.50679e+07	4.35658e+07	2.03454e+07
	FALSE	1,5-Isoquinolinediol	C9 H7 N O2	Full match	Full match	No results	Partial match	Partial match	-2.31	161.047	160.04	2.397	5.44907e+08	11	3	0	98.9	9.9			Therapeutics/Prescription Drugs		Reference-2549	No matches found	No matches found	DDA for preferred ion	[M-H]-1	2.50218e+08	3.31372e+08	2.37248e+08	2.54651e+08	2.6678e+08	2.80445e+08	2.79094e+08	2.39819e+08	2.29354e+08	1.87741e+08	3.11552e+08	2.42191e+08	3.24268e+08	2.93397e+08	2.61457e+08	3.33261e+08	2.57822e+08	2.76657e+08	2.54297e+08	2.69287e+08	2.42903e+08	1.72562e+08
	FALSE	1-(2-Furylmethyl)-5-oxopyrrolidine-3-carboxylic acid	C10 H11 N O4	No match	Invalid mass	No results	No results	No results	14.57	209.072	208.065	1.521	5.39814e+08	0	1	0	84.1	49.7					Reference-4356	No matches found	No matches found	DDA for preferred ion	[M-H]-1	2.95613e+08	1.87928e+08	1.00127e+08	1.20062e+08	9.45133e+07	1.04927e+08	1.82739e+08	2.20279e+08	2.96413e+08	3.73104e+08	2.81121e+08	2.49826e+08	1.02128e+08	2.71188e+08	1.96307e+08	3.05258e+08	2.0372e+08	1.22992e+08	1.53725e+08	3.41832e+08	2.32049e+08	5.39814e+08
	FALSE	Isobutyric acid	C4 H8 O2	Full match	Full match	No results	Not the top hit	Partial match	-2.69	88.0522	87.0449	1.943	5.35221e+08	13	1	0	99.5	10			Extractables/Leachables; Excipients/Additives/Colorants; Industrial Chemicals; Endogenous Metabolites; Pesticides/Herbicides	C02632	Reference-2753	No matches found	No matches found	DDA for preferred ion	[M-H]-1	1.68162e+08	2.07949e+08	9.24579e+07	1.59613e+08	1.26976e+08	9.90811e+07	1.1518e+08	1.28571e+08	1.83189e+08	3.73632e+08	4.65498e+08	1.51454e+08	2.81439e+08	2.92325e+08	3.15013e+08	5.35221e+08	1.53353e+08	1.37373e+08	2.33051e+08	3.40623e+08	2.17394e+08	1.61385e+08
	FALSE	NP-004768	C13 H12 O6	No match	Invalid mass	No results	No results	No match	-68194.7	246.056	245.048	1.755	5.30537e+08	1	3	0	95.1	9.8			Endogenous Metabolites; Natural Products/Medicines		Autoprocessed-7994	No matches found	No matches found	DDA for preferred ion	[M-H]-1	4.71879e+07	5.56419e+07	5.3076e+07	4.35477e+07	3.71419e+07	3.69022e+07	7.27242e+07	6.13885e+07	6.40393e+07	5.22335e+07	1.09398e+08	8.07574e+07	5.30537e+08	4.24549e+08	3.18908e+08	1.18314e+08	3.80522e+08	1.17749e+08	5.62084e+07	8.78199e+07	9.8653e+07	2.82468e+07
	FALSE	2-hydroxyiminoindane-1,3-dione	C9 H5 N O3	No match	Invalid mass	No results	No results	No results	17.45	175.03	174.023	1.01	5.23113e+08	0	1	0	86.7	9.3					Autoprocessed-2502	No matches found	No matches found	DDA for preferred ion	[M-H]-1	3.87204e+08	2.54319e+08	1.97289e+08	3.84214e+08	2.94315e+08	1.69864e+08	1.10517e+08	2.03165e+08	3.05883e+08	1.99504e+08	2.45152e+08	5.97878e+07	4.22079e+08	3.80411e+08	3.41878e+08	5.23113e+08	2.41248e+08	1.76799e+08	1.92076e+08	2.48003e+08	1.53671e+08	2.98312e+08
	FALSE	4-Oxoproline	C5 H7 N O3	Full match	Full match	No results	Partial match	Partial match	-1.72	129.042	128.035	9.024	5.2109e+08	8	1	0	98.4	9.9			Endogenous Metabolites	C01877	Reference-1268	No matches found	No matches found	DDA for preferred ion	[M-H]-1	1.12964e+08	2.57886e+08	1.44081e+08	1.95175e+08	1.7369e+08	1.49707e+08	2.13957e+08	2.4315e+08	9.03104e+07	2.65915e+08	3.57352e+08	2.16989e+08	1.76941e+08	2.1845e+08	3.81637e+08	2.9752e+08	1.63244e+08	3.62033e+08	1.99907e+08	5.2109e+08	2.39972e+08	1.61491e+08
	FALSE	Myristyl sulfate	C14 H30 O4 S	Full match	Full match	No results	No results	Full match	-0.84	294.186	293.179	0.766	5.15915e+08	1	2	0	99.9	10			Personal Care Products/Cosmetics; Extractables/Leachables; Therapeutics/Prescription Drugs		Reference-3131	No matches found	No matches found	DDA for preferred ion	[M-H]-1	7.86741e+06	8.14801e+06	6.82764e+06	8.96498e+06	8.838e+06	9.38547e+06	7.31497e+06	9.1647e+06	6.3396e+06	7.8607e+06	6.60228e+06	7.88147e+06	8.28201e+06	6.70082e+06	5.72144e+06	6.7426e+06	1.01261e+07	7.05018e+06	2.22413e+06	1.57796e+06	2.43077e+06	3.67462e+06
	FALSE	D-(-)-Arabinose	C5 H10 O5	Full match	Full match	No results	Not the top hit	Not the top hit	-1.93	150.053	149.045	3.747	5.11149e+08	46	4	0	98.7	9.9			Endogenous Metabolites; Excipients/Additives/Colorants	C00216	Reference-6206	No matches found	No matches found	DDA for preferred ion	[M-H]-1	1.76034e+08	5.11149e+08	1.51346e+08	1.66962e+08	1.97577e+08	3.55286e+08	3.09744e+08	4.00004e+08	8.47034e+07	3.2268e+08	4.44761e+08	4.55906e+08	1.87937e+08	1.2805e+08	2.45884e+08	1.58147e+07	1.58984e+08	2.89466e+08	3.41498e+08	4.74654e+08	2.39419e+08	1.40062e+08
	FALSE	NP-004768	C13 H12 O6	No match	Invalid mass	No results	No results	No match	-68194.1	246.056	245.049	0.782	4.87261e+08	1	3	0	98.9	9.9			Endogenous Metabolites; Natural Products/Medicines		Autoprocessed-7994	No matches found	No matches found	DDA for preferred ion	[M-H]-1	1.95703e+08	4.21809e+08	1.19334e+08	1.76793e+08	1.72805e+08	1.91536e+08	2.55538e+08	2.37063e+08	3.58545e+08	2.14408e+08	2.94624e+08	4.07924e+08	4.87261e+08	4.13272e+08	1.29429e+08	2.31242e+08	3.28411e+08	3.90716e+08	2.25135e+08	2.42242e+08	2.76305e+08	1.62164e+08
	FALSE	Adrenic acid	C22 H36 O2	Full match	Full match	No results	No results	Full match	-2.06	332.271	331.264	1.136	4.62635e+08	6	3	0	83.1	9.2				C16527	Reference-6824	No matches found	No matches found	DDA for preferred ion	[M-H]-1	2.9789e+07	5.54114e+07	1.79418e+08	2.06102e+07	2.55057e+07	3.47109e+07	2.17538e+07	4.54685e+07	5.68903e+07	6.6252e+07	1.01217e+08	8.87926e+07	4.96202e+07	4.25996e+07	3.50926e+07	7.75328e+07	6.50138e+07	5.21642e+07	5.51786e+07	3.46597e+07	7.43832e+07	4.24387e+08
	FALSE	Uracil	C4 H4 N2 O2	Full match	Full match	No results	Full match	Full match	-2.23	112.027	111.02	6.016	4.5417e+08	2	2	0	97	9.8			Endogenous Metabolites; Therapeutics/Prescription Drugs; Natural Products/Medicines; Pesticides/Herbicides	C00106	Reference-2531	No matches found	No matches found	DDA for preferred ion	[M-H]-1	7.26909e+07	4.5417e+08	6.29652e+07	1.66704e+08	6.45598e+07	7.27103e+07	6.03481e+07	7.4342e+07	5.55798e+07	1.55833e+08	3.08006e+08	1.78125e+08	8.80252e+07	1.59268e+08	1.83442e+08	2.57571e+08	9.8887e+07	1.09921e+08	7.92985e+07	3.54488e+08	1.29747e+08	7.70425e+07
	FALSE	Deoxycholic Acid	C24 H40 O4	No match	Invalid mass	No results	No results	No results	91707	428.269	427.261	3.516	4.52466e+08	0	3	0	86.7	9.3	53.8		Endogenous Metabolites		Autoprocessed-8527	No matches found	No matches found	DDA for preferred ion	[M-H]-1	3.36832e+08	1.6668e+08	2.13407e+08	1.96837e+08	2.17489e+08	1.02511e+08	1.70913e+08	1.59506e+08	3.43621e+08	2.99258e+08	1.58712e+08	2.41905e+08	1.67365e+08	9.47381e+07	1.1408e+08	3.28768e+08	2.5822e+08	1.36329e+08	1.41267e+08	8.97263e+07	2.51263e+08	1.72339e+08
	FALSE	2-(acetylamino)-4-(methylthio)butanoic acid	C7 H13 N O3 S	Full match	Full match	No results	No results	Full match	-1.59	191.061	190.054	5.606	4.48742e+08	2	2	0	97.7	94					Autoprocessed-5545	No matches found	No matches found	DDA for preferred ion	[M-H]-1	1.02139e+08	1.77814e+08	7.33403e+07	2.07298e+08	1.46429e+08	1.19181e+08	1.0773e+08	9.85212e+07	7.94632e+07	1.83985e+08	2.27881e+08	1.23776e+08	1.335e+08	2.14222e+08	2.45303e+08	3.90038e+08	6.26769e+07	2.07028e+08	1.69433e+08	4.48742e+08	9.72547e+07	3.0969e+08
	FALSE	Uracil	C4 H4 N2 O2	Full match	Full match	No results	Full match	Full match	-2.52	112.027	111.02	5.52	4.44167e+08	2	2	0	81.6	9.1			Endogenous Metabolites; Therapeutics/Prescription Drugs; Natural Products/Medicines; Pesticides/Herbicides	C00106	Reference-2531	No matches found	No matches found	DDA for preferred ion	[M-H]-1	8.22561e+07	9.94188e+07	8.03951e+07	7.58101e+07	9.39586e+07	1.16834e+08	1.26465e+08	7.70729e+07	2.06306e+07	7.57545e+07	1.41579e+08	1.95496e+07	9.20057e+07	1.56056e+08	4.44167e+08	9.02922e+07	5.5519e+07	1.76073e+07	7.82406e+07	1.32985e+08	4.89131e+07	4.57801e+07
	FALSE	1,5-Isoquinolinediol	C9 H7 N O2	Full match	Full match	No results	Partial match	Partial match	-1.78	161.047	160.04	9.952	4.30721e+08	11	6	0	98.6	9.9	63.5		Therapeutics/Prescription Drugs		Reference-2549	No matches found	No matches found	DDA for preferred ion	[M-H]-1	2.74208e+08	3.14224e+08	2.61099e+08	2.74781e+08	2.55307e+08	2.40487e+08	2.75422e+08	2.43341e+08	2.5143e+08	2.00906e+08	3.22682e+08	2.43203e+08	4.30721e+08	4.01251e+08	2.78467e+08	3.7801e+08	3.35859e+08	4.01221e+08	2.73846e+08	2.85104e+08	2.76962e+08	2.731e+08
	FALSE	Corchorifatty acid F	C18 H32 O5	Full match	Full match	No results	No results	Full match	-1.85	328.224	327.217	2.706	4.29115e+08	3	4	0	85.7	67	60.7				Reference-7750	No matches found	No matches found	DDA for preferred ion	[M-H]-1	2.43395e+08	1.89945e+08	1.45995e+08	2.80374e+08	1.81785e+08	1.4054e+08	4.29115e+08	2.03706e+08	1.59116e+08	1.49214e+08	1.90254e+08	1.18695e+08	2.99742e+08	2.30048e+08	2.91023e+08	2.52966e+08	2.6941e+08	1.82617e+08	2.27322e+08	1.68656e+08	1.16243e+08	1.95562e+08
	FALSE	2-(Acetylamino)hexanoic acid	C8 H15 N O3	Full match	Full match	No results	No results	Partial match	-1.7	173.105	172.098	5.029	4.27333e+08	5	2	0	99.4	10					Reference-3771	No matches found	No matches found	DDA for preferred ion	[M-H]-1	1.99036e+07	1.69393e+07	1.35171e+07	1.66121e+07	1.14956e+07	1.41483e+07	1.7193e+07	1.07935e+07	1.15889e+07	1.31187e+07	3.27651e+07	1.1027e+07	1.80995e+07	3.87282e+07	6.02834e+07	4.27333e+08	1.58402e+07	2.29194e+07	1.24427e+07	4.54718e+07	1.3541e+07	2.54583e+07
	FALSE	L-Cysteic acid	C3 H7 N O5 S	Full match	Full match	No results	Full match	Full match	-1.88	169.004	167.997	4.135	3.88673e+08	1	1	0	83.8	9.2			Endogenous Metabolites	C00506	Reference-464	No matches found	No matches found	DDA for preferred ion	[M-H]-1	2.85088e+08	3.34209e+08	2.4291e+08	2.44102e+08	2.06847e+08	1.88449e+08	1.59416e+08	2.63401e+08	2.70697e+08	1.69092e+08	1.83467e+08	1.39497e+08	2.7881e+08	3.212e+08	2.20363e+08	3.88673e+08	3.41242e+08	2.39302e+08	1.45413e+08	1.77198e+08	1.5584e+08	3.95959e+07
	FALSE	4-Nitrocatechol	C6 H5 N O4	No match	Invalid mass	No results	No results	No match	20.19	155.025	154.018	9.204	3.84619e+08	2	1	0	95.8	9.8				C02235	Reference-242	No matches found	No matches found	DDA for preferred ion	[M-H]-1	2.49243e+08	3.35623e+08	1.71765e+08	3.2196e+08	2.69722e+08	2.43644e+08	2.44897e+08	2.35048e+08	1.71126e+08	1.31708e+08	1.72579e+08	1.23724e+08	3.61722e+08	3.20326e+08	3.79277e+08	2.93101e+08	1.01022e+08	3.4943e+08	1.80954e+08	3.84619e+08	9.54414e+07	1.88682e+07
	FALSE	(±)9(10)-DiHOME	C18 H34 O4	No match	Invalid mass	No results	No results	No match	-57315.7	296.235	295.227	1.119	3.78846e+08	10	9	0	94.6	9.7			Endogenous Metabolites		Autoprocessed-8489	No matches found	No matches found	DDA for preferred ion	[M-H]-1	1.1361e+08	1.17028e+08	1.34003e+08	1.31967e+08	1.41845e+08	1.98556e+08	3.78846e+08	1.59178e+08	1.33375e+08	1.02547e+08	2.02684e+08	1.23572e+08	2.13411e+08	2.28533e+08	2.14992e+08	1.46506e+08	9.46021e+07	2.82041e+08	1.45216e+08	1.26135e+08	1.34816e+08	8.72761e+07
	FALSE	DL-Lactic Acid	C3 H6 O3	Full match	Full match	No results	Not the top hit	Full match	-2.98	90.0314	89.0242	5.586	3.61769e+08	13	2	0	100	10			Extractables/Leachables; Personal Care Products/Cosmetics; Therapeutics/Prescription Drugs; Natural Products/Medicines; Excipients/Additives/Colorants; Industrial Chemicals; Textile Chemicals/Auxiliary/Dyes	C01432	Reference-2603	No matches found	No matches found	DDA for preferred ion	[M-H]-1	1.52302e+08	2.02765e+08	2.4252e+08	2.30727e+08	2.28916e+08	2.42217e+08	3.33231e+08	2.36745e+08	1.39308e+08	1.7075e+08	2.45151e+08	2.16013e+08	1.76423e+08	3.40744e+08	3.58309e+08	2.6603e+08	1.56116e+08	3.14903e+08	2.29586e+08	3.61769e+08	1.42468e+08	1.11218e+08
	FALSE	Benzoic acid	C7 H6 O2	Full match	Full match	No results	Full match	Full match	-2.03	122.037	121.029	1.223	3.57275e+08	7	2	0	99.6	10			Industrial Chemicals; Excipients/Additives/Colorants; Endogenous Metabolites	C00180	Reference-332	No matches found	No matches found	DDA for preferred ion	[M-H]-1	2.08641e+08	2.3612e+08	2.41514e+08	2.15781e+08	1.9681e+08	1.71797e+08	1.43267e+08	1.59709e+08	2.10722e+08	1.81831e+08	1.75012e+08	1.08164e+08	1.50869e+08	3.15517e+08	2.4098e+08	2.78081e+08	1.77095e+08	1.63091e+08	1.78155e+08	2.14283e+08	2.24933e+08	2.19025e+08
	FALSE	4-Indolecarbaldehyde	C9 H7 N O	Full match	Full match	No results	No results	Partial match	-1.77	145.053	144.045	6.638	3.54875e+08	8	1	0	99.7	10					Reference-1723	No matches found	No matches found	DDA for preferred ion	[M-H]-1	3.02147e+08	3.05564e+08	2.19708e+08	2.21115e+08	1.9115e+08	1.69364e+08	5.74318e+07	8.32721e+07	2.08155e+08	1.87845e+08	1.35015e+08	1.69312e+08	3.00967e+08	3.54875e+08	1.37914e+08	3.03759e+08	2.33442e+08	2.46062e+08	1.39282e+08	1.17374e+08	2.0639e+08	5.6562e+07
	FALSE	Gentisic acid	C7 H6 O4	No match	Invalid mass	No results	No results	No results	19.98	154.03	153.022	3.396	3.39031e+08	0	6	0	82	9.1			Therapeutics/Prescription Drugs; Endogenous Metabolites	C00628	Reference-110	No matches found	No matches found	DDA for preferred ion	[M-H]-1	3.39031e+08	3.36885e+08	2.49525e+08	2.9557e+08	2.39309e+08	2.17313e+08	1.58451e+08	2.27738e+08	2.90791e+08	1.91417e+08	2.53235e+08	2.35548e+08	3.30415e+08	2.76226e+08	2.00196e+08	3.13063e+08	2.52483e+08	2.23883e+08	2.67696e+08	1.99887e+08	2.36172e+08	2.9463e+08
	FALSE	Azelaic acid	C9 H16 O4	Full match	Full match	No results	No results	Full match	-1.45	188.105	187.097	10.033	3.38709e+08	10	4	0	99.7	88.6	76.7		Endogenous Metabolites; Excipients/Additives/Colorants; Industrial Chemicals	C08261	Reference-331	No matches found	No matches found	DDA for preferred ion	[M-H]-1	1.54573e+08	2.38985e+08	1.21559e+08	1.30581e+08	1.20408e+08	1.20102e+08	1.23265e+08	1.27643e+08	1.10211e+08	9.58018e+07	2.6202e+08	1.38337e+08	2.54507e+08	2.77909e+08	1.83176e+08	3.38709e+08	2.49863e+08	2.20285e+08	1.34594e+08	1.90403e+08	1.7555e+08	1.44064e+08
	FALSE	Hexanoic acid	C6 H12 O2	Full match	Full match	No results	No results	Partial match	-2.25	116.083	115.076	1.588	3.35488e+08	22	1	0	86.9	9.3			Endogenous Metabolites; Extractables/Leachables; Excipients/Additives/Colorants; Textile Chemicals/Auxiliary/Dyes; Industrial Chemicals	C01585	Reference-2710	No matches found	No matches found	DDA for preferred ion	[M-H]-1	2.77236e+08	1.886e+08	2.753e+07	4.31488e+07	4.9839e+07	4.87563e+07	4.94625e+07	4.40257e+07	4.38686e+07	1.31574e+08	2.72869e+08	1.42504e+08	1.57469e+08	6.24792e+07	1.3532e+08	3.35488e+08	3.59826e+07	8.01364e+07	9.79243e+07	1.97857e+08	9.58929e+07	5.43317e+07
	FALSE	2-(Acetylamino)hexanoic acid	C8 H15 N O3	Full match	Full match	No results	No results	Partial match	-1.55	173.105	172.098	5.449	3.30055e+08	5	2	0	99.4	10					Reference-3771	No matches found	No matches found	DDA for preferred ion	[M-H]-1	1.33044e+08	1.56866e+08	7.52809e+07	1.33555e+08	1.08101e+08	9.99962e+07	1.18261e+08	8.30263e+07	9.48591e+07	1.44924e+08	2.42795e+08	1.37535e+08	1.57773e+08	2.01819e+08	2.03528e+08	3.16366e+08	1.06439e+08	1.96701e+08	1.19782e+08	3.30055e+08	1.14746e+08	1.46246e+08
	FALSE	4-Hydroxymandelic acid	C8 H8 O4	No match	Invalid mass	No results	No results	No results	17.69	168.045	167.038	2.501	3.24039e+08	0	10	0	93	9.6			Endogenous Metabolites	C11527	Reference-237	No matches found	No matches found	DDA for preferred ion	[M-H]-1	3.24039e+08	3.11227e+08	2.38533e+08	3.1236e+08	2.39913e+08	2.19484e+08	1.77177e+08	2.44945e+08	2.99847e+08	2.1351e+08	2.31625e+08	2.36717e+08	2.97074e+08	2.61298e+08	2.05397e+08	2.87639e+08	2.08191e+08	2.70076e+08	2.22985e+08	1.98215e+08	1.99134e+08	3.16878e+08
	FALSE	11(Z),14(Z)-Eicosadienoic Acid	C20 H36 O2	Full match	Full match	No results	No results	Not the top hit	-2.24	308.271	307.264	1.134	3.16893e+08	6	2	0	80.4	9			Endogenous Metabolites		Autoprocessed-8495	No matches found	No matches found	DDA for preferred ion	[M-H]-1	3.27264e+07	2.71657e+08	1.38771e+08	7.16587e+07	9.4573e+07	1.67272e+08	9.11309e+07	1.63224e+08	1.99252e+08	8.86735e+07	1.93594e+08	1.38403e+08	5.37246e+07	3.98736e+07	3.62516e+07	9.59444e+07	8.06161e+07	6.94722e+07	7.1413e+07	1.87592e+08	1.29172e+08	8.45658e+07
	FALSE	β-Muricholic acid	C24 H40 O5	Not the top hit	Full match	No results	No results	Not the top hit	-1.28	408.287	407.28	6.92	3.13323e+08	20	5	0	99.4	10			Endogenous Metabolites		Autoprocessed-8518	No matches found	No matches found	DDA for preferred ion	[M-H]-1	1.49099e+08	1.01514e+08	1.15605e+08	1.33264e+08	1.0753e+08	8.39172e+07	9.84656e+07	1.40065e+08	1.65516e+08	2.4445e+08	1.50328e+08	1.61555e+08	1.32289e+08	1.70501e+08	1.10943e+08	2.12951e+08	2.26358e+08	1.03678e+08	9.84988e+07	1.31037e+08	1.63934e+08	1.78829e+08
	FALSE	2,3-Dihydro-1-benzofuran-2-carboxylic acid	C9 H8 O3	Full match	Full match	No results	Partial match	Partial match	-1.62	164.047	163.04	3.677	3.11046e+08	19	2	0	98.3	9.9					Reference-5582	No matches found	No matches found	DDA for preferred ion	[M-H]-1	1.18786e+08	1.2434e+08	1.90435e+08	1.31208e+08	1.21611e+08	2.16547e+08	1.10861e+08	1.05896e+08	6.66195e+07	1.08158e+08	8.97425e+07	7.73616e+07	8.6582e+07	1.7095e+08	3.11046e+08	1.06179e+08	1.07725e+08	1.6434e+08	1.83651e+08	1.50156e+08	8.39652e+07	1.37163e+08
	FALSE	Deoxycholic Acid	C24 H40 O4	Not the top hit	Full match	No results	No results	Not the top hit	-1.77	392.292	391.285	3.86	3.08497e+08	19	2	0	99	9.9			Endogenous Metabolites		Autoprocessed-8527	No matches found	No matches found	DDA for preferred ion	[M-H]-1	2.37894e+08	2.05755e+08	1.24791e+08	1.36845e+08	1.38078e+08	1.45376e+08	1.98245e+08	1.26104e+08	1.99896e+08	1.9919e+08	1.88892e+08	3.08497e+08	1.36477e+08	8.35061e+07	1.08763e+08	8.76681e+07	1.53718e+08	1.61615e+08	1.03893e+08	8.66105e+07	1.28513e+08	1.14508e+08
	FALSE	1-Chlorobenzotriazole	C6 H4 Cl N3	No match	Full match	No results	No match	No match	-0.8	153.009	152.002	4.792	2.92742e+08	3	2	0	86	9.3					Reference-3125	No matches found	No matches found	DDA for preferred ion	[M-H]-1	7.9229e+07	6.78023e+07	7.80142e+07	5.60315e+07	3.70539e+07	4.49033e+07	7.16134e+07	1.23711e+08	1.07758e+08	2.29211e+08	1.42842e+08	3.90664e+07	3.63618e+07	2.35559e+08	1.54725e+08	1.2898e+08	2.92742e+08	5.68588e+07	6.40908e+07	1.61614e+08	2.53444e+08	1.81767e+08
	FALSE	1-(2-Furylmethyl)-5-oxopyrrolidine-3-carboxylic acid	C10 H11 N O4	No match	Invalid mass	No results	No results	No results	14.39	209.072	208.065	1.275	2.80052e+08	0	1	0	82.9	49.4					Reference-4356	No matches found	No matches found	DDA for preferred ion	[M-H]-1	1.63129e+08	9.60245e+07	5.96436e+07	6.25235e+07	4.75549e+07	6.2794e+07	9.59373e+07	1.18796e+08	1.47706e+08	1.87082e+08	1.31352e+08	1.13766e+08	5.18295e+07	1.34276e+08	9.64226e+07	1.32276e+08	9.52672e+07	6.57527e+07	8.53478e+07	1.6731e+08	1.23779e+08	2.80052e+08
	FALSE	Argininosuccinic acid	C10 H18 N4 O6	Unused	Invalid mass	No results	No results	No match	-15.15	290.118	289.111	2.342	2.7986e+08	1	2	0	82.9	9.1			Endogenous Metabolites	C03406	Reference-324	No matches found	No matches found	DDA for preferred ion	[M-H]-1	1.51888e+08	1.96117e+08	1.70428e+08	1.62458e+08	1.16959e+08	1.04343e+08	1.77385e+08	1.11413e+08	1.65212e+08	1.65471e+08	9.99369e+07	1.92543e+08	1.16754e+08	1.79926e+08	1.04921e+08	1.95774e+08	1.74101e+08	1.22004e+08	1.85305e+08	6.8551e+07	1.20355e+08	9.5781e+07
	FALSE	Argininosuccinic acid	C10 H18 N4 O6	Unused	Invalid mass	No results	No results	No match	-15.16	290.118	289.111	2.083	2.77968e+08	1	2	0	82.9	9.1			Endogenous Metabolites	C03406	Reference-324	No matches found	No matches found	DDA for preferred ion	[M-H]-1	1.52801e+08	1.87425e+08	1.63426e+08	2.37553e+08	1.73773e+08	6.65443e+07	6.83386e+07	1.09305e+08	2.52964e+08	1.4422e+08	1.21109e+08	1.48344e+08	1.41656e+08	2.544e+08	1.00486e+08	2.2073e+08	1.71073e+08	1.99588e+08	1.51927e+08	8.21525e+07	1.82375e+08	1.2348e+08
	FALSE	Deoxycholic Acid	C24 H40 O4	Full match	Full match	No results	No results	Not the top hit	-1.81	392.292	391.285	3.715	2.71e+08	19	2	0	99	9.9			Endogenous Metabolites		Autoprocessed-8527	No matches found	No matches found	DDA for preferred ion	[M-H]-1	2.37894e+08	2.11313e+08	1.32675e+08	1.21523e+08	1.32468e+08	1.34408e+08	1.4214e+08	1.57856e+08	1.60647e+08	1.9919e+08	2.06471e+08	2.71e+08	1.50144e+07	8.59713e+07	8.47028e+07	8.8194e+07	1.66385e+08	1.61615e+08	1.09394e+08	9.68878e+07	1.35663e+08	1.18118e+08
	FALSE	NP-008607	C28 H46 O7	No match	Invalid mass	No results	No results	No match	72757.9	530.29	529.283	1.096	2.65702e+08	2	1	0	90.5	9.5			Endogenous Metabolites; Natural Products/Medicines		Autoprocessed-7707	No matches found	No matches found	DDA for preferred ion	[M-H]-1	1.86916e+08	1.28835e+08	1.96616e+08	1.8926e+08	1.69309e+08	1.57277e+08	1.69641e+08	2.49708e+08	2.27354e+08	2.41988e+08	1.30654e+08	2.62076e+08	1.18209e+08	1.61567e+08	1.29282e+08	1.33585e+08	2.11567e+08	1.30526e+08	1.65344e+08	1.1778e+08	1.31371e+08	1.92261e+08
	FALSE	(+/-)12(13)-DiHOME	C18 H34 O4	Full match	Full match	No results	No results	Partial match	-1.42	314.245	313.238	1.546	2.64845e+08	5	5	0	95	61.8			Endogenous Metabolites		Autoprocessed-8484	No matches found	No matches found	DDA for preferred ion	[M-H]-1	1.33634e+08	2.64845e+08	1.08352e+08	1.61382e+08	2.00118e+08	1.24714e+08	1.65855e+08	1.11062e+08	1.7509e+08	1.63944e+08	1.03799e+08	1.06872e+08	1.81825e+08	2.63461e+08	1.7277e+08	1.59835e+08	1.87851e+08	2.20632e+08	1.81352e+08	2.51476e+08	2.04282e+08	1.70842e+08
	FALSE	(+/-)12(13)-DiHOME	C18 H34 O4	No match	Invalid mass	No results	No results	No match	-146401	268.24	313.238	1.541	2.63461e+08	7	5	0	95	61.8			Endogenous Metabolites	C14829	Reference-6638	No matches found	No matches found	DDA for other ion	[M+FA-H]-1	1.33634e+08	1.42399e+08	1.08352e+08	1.61382e+08	2.00118e+08	1.24714e+08	1.65855e+08	1.11062e+08	1.7509e+08	1.63944e+08	1.03799e+08	1.06872e+08	1.81825e+08	2.63461e+08	1.7277e+08	1.59835e+08	1.87851e+08	2.20632e+08	1.81352e+08	2.51476e+08	2.04282e+08	1.70842e+08
	FALSE	Benzoic acid	C7 H6 O2	Full match	Full match	No results	Full match	Full match	-2.04	122.037	121.029	1.582	2.58583e+08	7	2	0	99.6	10			Industrial Chemicals; Excipients/Additives/Colorants; Endogenous Metabolites	C00180	Reference-332	No matches found	No matches found	DDA for preferred ion	[M-H]-1	2.01987e+08	1.58485e+08	2.46472e+08	1.54873e+08	1.77681e+08	1.41839e+08	1.42837e+08	1.14989e+08	7.95536e+07	1.25993e+08	7.22673e+07	7.74127e+07	5.82104e+07	1.89106e+08	2.25973e+08	1.77807e+08	1.72947e+08	6.46877e+07	1.09286e+08	1.24644e+08	1.48169e+08	7.77883e+07
	FALSE	NP-008607	C28 H46 O7	No match	Invalid mass	No results	No results	No match	72758.1	530.29	529.283	1.461	2.46442e+08	2	1	0	90	9.5			Endogenous Metabolites; Natural Products/Medicines		Autoprocessed-7707	No matches found	No matches found	DDA for preferred ion	[M-H]-1	1.8142e+08	1.14119e+08	1.74476e+08	1.77688e+08	1.34985e+08	1.12143e+08	1.20146e+08	1.84439e+08	2.06198e+08	2.21786e+08	1.16503e+08	2.46442e+08	1.22085e+08	1.51006e+08	9.01669e+07	1.30941e+08	1.90131e+08	1.03463e+08	1.52848e+08	1.05637e+08	1.10794e+08	1.81048e+08
	FALSE	N-{[(2R,4S,5R)-5-{2-Methyl-6-[4-(trifluoromethyl)phenyl]-4-pyrimidinyl}-1-azabicyclo[2.2.2]oct-2-yl]methyl}cyclobutanecarboxamide	C25 H29 F3 N4 O	Unused	Invalid mass	No results	No results	No match	8.02	458.233	457.226	3.826	2.43953e+08	1	1	0	83	9.2					Reference-9286	No matches found	No matches found	DDA for preferred ion	[M-H]-1	1.46729e+08	8.42552e+07	1.49737e+08	1.40885e+08	1.17152e+08	1.04091e+08	1.14946e+08	1.53515e+08	1.06386e+08	1.17634e+08	8.16926e+07	1.57162e+08	7.83702e+07	1.08291e+08	7.98039e+07	5.65543e+07	1.95664e+08	8.52553e+07	1.18722e+08	1.03767e+08	1.34343e+08	2.43953e+08
	FALSE	NP-020283	C29 H46 O6	No match	Invalid mass	No results	No results	No results	-36733.3	472.318	471.311	4.732	2.37994e+08	0	1	0	93.8	9.7			Endogenous Metabolites; Natural Products/Medicines		Autoprocessed-5746	No matches found	No matches found	DDA for preferred ion	[M-H]-1	2.12415e+08	1.21064e+08	1.92162e+08	1.98157e+08	1.72243e+08	1.56361e+08	1.1293e+08	2.22494e+08	2.10854e+08	2.01346e+08	1.31871e+08	1.7265e+08	1.36367e+08	1.13206e+08	1.06457e+08	8.05241e+07	1.815e+08	9.30213e+07	1.21781e+08	1.43936e+08	1.58765e+08	2.26192e+08
	FALSE	(2R)-2,3-Dihydroxypropanoic acid	C3 H6 O4	Full match	Full match	No results	Full match	Full match	-2.71	106.026	105.019	8.953	2.29479e+08	3	1	0	80.8	9			Endogenous Metabolites	C00258	Reference-394	No matches found	No matches found	DDA for preferred ion	[M-H]-1	1.49982e+07	2.25814e+07	1.94861e+07	2.32881e+07	3.36631e+07	3.25506e+07	3.29664e+07	4.81676e+07	1.05331e+07	7.15365e+07	7.35026e+07	2.76302e+07	4.65124e+07	9.66991e+07	1.32162e+08	1.42014e+08	7.62738e+07	4.53897e+07	6.88544e+07	2.29479e+08	7.00228e+07	3.70573e+07
	FALSE	D-(-)-Mannitol	C6 H14 O6	Full match	Full match	No results	Full match	Full match	-1.83	182.079	181.071	8.554	2.27389e+08	11	3	0	90.7	21.9			Therapeutics/Prescription Drugs; Endogenous Metabolites; Excipients/Additives/Colorants	D00062	Reference-1527	No matches found	No matches found	DDA for preferred ion	[M-H]-1	5.03341e+07	4.36485e+07	2.75583e+07	9.12926e+07	2.27389e+08	4.68225e+07	6.99204e+07	5.10407e+07	7.04236e+07	3.22298e+07	3.05777e+07	4.4379e+07	5.08202e+07	5.31765e+07	3.83233e+07	1.07255e+08	3.51742e+07	9.89102e+07	5.61854e+07	6.55836e+07	7.12736e+07	6.9271e+07
	FALSE	(15Z)-9,12,13-Trihydroxy-15-octadecenoic acid	C18 H34 O5	Full match	Full match	No results	No results	Partial match	-1.95	330.24	329.233	2.431	2.27185e+08	5	1	0	81.8	49.1					Reference-7727	No matches found	No matches found	DDA for preferred ion	[M-H]-1	4.05327e+07	4.19026e+07	3.2159e+07	5.0049e+07	4.53436e+07	3.99894e+07	6.00069e+07	3.36644e+07	3.6579e+07	2.77631e+07	3.19282e+07	3.68755e+07	4.10324e+07	4.40984e+07	4.45087e+07	5.05908e+07	3.37142e+07	4.42037e+07	2.70631e+07	3.40065e+07	2.27774e+07	2.09406e+07
	FALSE	11(E)-Eicosenoic Acid	C20 H38 O2	Full match	Full match	No results	No results	Partial match	-1.86	310.287	309.279	1.066	2.26087e+08	12	3	0	83	9.2			Endogenous Metabolites		Autoprocessed-8505	No matches found	No matches found	DDA for preferred ion	[M-H]-1	8.62391e+07	1.95476e+08	1.2099e+08	1.53233e+08	1.12938e+08	1.48071e+08	1.18622e+08	1.208e+08	1.15081e+08	1.4504e+08	2.26087e+08	1.63402e+08	1.19703e+08	1.57138e+08	1.3664e+08	1.35323e+08	1.60607e+08	1.72178e+08	1.85966e+08	1.35931e+08	2.24456e+08	1.99298e+08
	FALSE	11(E)-Eicosenoic Acid	C20 H38 O2	No match	Invalid mass	No results	No results	No match	58043.1	328.297	309.279	1.059	2.26087e+08	5	3	0	83	9.2			Endogenous Metabolites		Autoprocessed-8505	No matches found	No matches found	DDA for other ion	[M-H-H2O]-1	8.62391e+07	1.95476e+08	1.2099e+08	1.23022e+08	1.12938e+08	1.20869e+08	1.18622e+08	1.208e+08	1.15081e+08	1.4504e+08	2.26087e+08	1.63402e+08	1.19703e+08	1.2691e+08	1.3664e+08	1.35323e+08	1.60607e+08	1.72178e+08	1.48862e+08	1.10994e+08	2.24456e+08	1.99298e+08
	FALSE	(+/-)9,10-dihydroxy-12Z-octadecenoic acid	C18 H34 O4	No match	Invalid mass	No results	No results	No match	-57315.3	296.235	295.227	1.375	2.25057e+08	10	9	0	96	63.3			Endogenous Metabolites		Reference-9799	No matches found	No matches found	DDA for preferred ion	[M-H]-1	1.27496e+08	1.06426e+08	1.04536e+08	1.23696e+08	1.32625e+08	1.5902e+08	2.25057e+08	8.7986e+07	1.34178e+08	6.74981e+07	1.36416e+08	1.38099e+08	1.34372e+08	1.40835e+08	1.45558e+08	1.7228e+08	1.08633e+08	1.83716e+08	1.07491e+08	1.06214e+08	1.13388e+08	9.78386e+07
	FALSE	6-Hydroxycaproic acid	C6 H12 O3	No match	Invalid mass	No results	No results	No match	-348321	86.0729	131.071	5.38	2.22453e+08	17	3	0	97.5	65.4			Endogenous Metabolites	C06103	Reference-1203	No matches found	No matches found	DDA for other ion	[M+FA-H]-1	2.17852e+08	1.97233e+08	4.88135e+07	7.08836e+07	5.40322e+07	3.83343e+07	3.09147e+07	5.62592e+07	5.90266e+07	9.72522e+07	1.94788e+08	1.08301e+08	1.5346e+08	1.09038e+08	1.97534e+08	2.22453e+08	8.08562e+07	1.26803e+08	5.35878e+07	9.61129e+07	7.27645e+07	4.19804e+07
	FALSE	6-Hydroxycaproic acid	C6 H12 O3	Full match	Full match	No results	No results	Partial match	-2.08	132.078	131.071	5.383	2.22453e+08	20	3	0	92.4	56.4			Endogenous Metabolites	C06103	Reference-1203	No matches found	No matches found	DDA for preferred ion	[M-H]-1	2.17852e+08	1.97233e+08	4.88135e+07	7.08836e+07	5.40322e+07	3.83343e+07	3.09147e+07	5.62592e+07	5.90266e+07	9.72522e+07	1.94788e+08	1.08301e+08	1.5346e+08	1.09038e+08	1.97534e+08	2.22453e+08	8.08562e+07	1.26803e+08	5.35878e+07	9.61129e+07	7.27645e+07	4.19804e+07
	FALSE	α-Cyano-3-hydroxycinnamic acid	C10 H7 N O3	No results	Invalid mass	No results	No results	No match	-190312	153.066	188.035	4.931	1.9539e+08	1	3	0	99.1	10	51.5				Reference-1757	No matches found	No matches found	DDA for other ion	[M+Cl]-1	1.45026e+08	5.68392e+07	1.0189e+08	1.50339e+08	1.15778e+08	8.24395e+07	1.65777e+08	1.15056e+08	1.12079e+08	8.18237e+07	6.71737e+07	6.36248e+07	1.77558e+08	1.43624e+08	1.5292e+08	1.6173e+08	6.29132e+07	1.52757e+08	7.78534e+07	7.37642e+07	9.50891e+07	1.09024e+08
	FALSE	α-Cyano-3-hydroxycinnamic acid	C10 H7 N O3	Full match	Full match	No results	Partial match	Partial match	-1.71	189.042	188.035	4.947	1.9539e+08	4	3	0	99.1	10	51.5				Reference-1757	No matches found	No matches found	DDA for preferred ion	[M-H]-1	1.45026e+08	5.68392e+07	1.0189e+08	1.50339e+08	1.15778e+08	8.24395e+07	1.65777e+08	1.15056e+08	1.12079e+08	8.18237e+07	6.71737e+07	6.36248e+07	1.77558e+08	1.43624e+08	1.5292e+08	1.6173e+08	6.29132e+07	1.52757e+08	7.78534e+07	7.37642e+07	9.50891e+07	1.09024e+08
	FALSE	Acrylic acid	C3 H4 O2	Full match	Full match	No results	Not the top hit	Partial match	-2.88	72.0209	71.0136	5.812	1.94596e+08	4	1	0	99.8	10			Extractables/Leachables; Textile Chemicals/Auxiliary/Dyes; Personal Care Products/Cosmetics; Industrial Chemicals; Endogenous Metabolites; Excipients/Additives/Colorants	C00511	Reference-2696	No matches found	No matches found	DDA for preferred ion	[M-H]-1	5.96172e+07	9.12174e+07	1.04117e+08	1.05998e+08	1.03983e+08	1.09552e+08	1.65347e+08	1.05689e+08	5.0401e+07	8.029e+07	9.96642e+07	8.25898e+07	7.47367e+07	1.81715e+08	1.51783e+08	1.3003e+08	6.80495e+07	1.58368e+08	9.10567e+07	1.59883e+08	6.69029e+07	6.08341e+07
	FALSE	(±)9-HpODE	C18 H32 O4	Full match	Full match	No results	Full match	Full match	-1.86	312.229	311.222	1.711	1.87851e+08	10	2	0	80.3	48.7			Endogenous Metabolites		Autoprocessed-8563	No matches found	No matches found	DDA for preferred ion	[M-H]-1	6.05398e+07	1.08678e+08	4.78879e+07	6.672e+07	8.18746e+07	6.57179e+07	5.02138e+07	5.8915e+07	7.34094e+07	5.70246e+07	1.24274e+08	1.112e+08	8.71266e+07	5.16568e+07	1.7277e+08	1.69514e+08	1.87851e+08	8.63896e+07	7.21254e+07	7.5284e+07	6.12556e+07	4.42471e+07
	FALSE	NP-008607	C28 H46 O7	No match	Invalid mass	No results	No results	No match	72758.1	530.29	529.283	1.013	1.86205e+08	2	1	0	84.5	49.8			Endogenous Metabolites; Natural Products/Medicines		Autoprocessed-7707	No matches found	No matches found	DDA for preferred ion	[M-H]-1	3.19972e+07	2.10863e+07	2.02094e+07	2.39385e+07	1.71777e+07	1.4265e+07	1.89764e+07	2.27435e+07	2.94275e+07	3.09681e+07	2.58081e+07	3.2191e+07	2.19285e+07	3.25442e+07	2.60063e+07	3.71512e+07	3.43764e+07	1.84771e+07	2.49927e+07	2.85076e+07	2.56403e+07	3.70669e+07
	FALSE	2-(2-chlorophenyl)-1H-indole	C14 H10 Cl N	No match	Invalid mass	No results	No results	No results	-18.21	227.046	226.039	5.158	1.8384e+08	0	1	0	83.7	9.2					Autoprocessed-7962	No matches found	No matches found	DDA for preferred ion	[M-H]-1	1.7513e+08	1.66937e+08	1.25768e+08	1.64949e+08	1.31672e+08	1.15829e+08	9.53632e+07	1.18907e+08	1.72564e+08	1.16016e+08	1.23436e+08	1.42381e+08	1.69275e+08	1.6084e+08	1.05037e+08	1.64653e+08	1.56713e+08	1.32576e+08	1.16575e+08	9.25052e+07	1.21768e+08	1.64661e+08
	FALSE	(±)9-HpODE	C18 H32 O4	Full match	Full match	No results	Full match	Full match	-1.45	312.23	311.222	1.437	1.79234e+08	10	4	0	81.4	49	62.7		Endogenous Metabolites		Autoprocessed-8563	No matches found	No matches found	DDA for preferred ion	[M-H]-1	1.12227e+08	8.90554e+07	9.84328e+07	9.16086e+07	9.59777e+07	1.53864e+08	1.33789e+08	7.49508e+07	1.08483e+08	7.72395e+07	1.31991e+08	1.61279e+08	1.20599e+08	1.22e+08	1.28528e+08	1.55079e+08	9.09119e+07	1.79234e+08	1.02751e+08	1.00132e+08	1.15924e+08	1.00841e+08
	FALSE	(±)9-HpODE	C18 H32 O4	No match	Invalid mass	No results	No results	No match	-192235	252.208	311.222	1.439	1.79234e+08	10	4	0	81.4	49	62.7		Endogenous Metabolites		Autoprocessed-8563	No matches found	No matches found	DDA for other ion	[M-H+HAc]-1	1.12227e+08	8.90554e+07	9.84328e+07	9.16086e+07	9.59777e+07	1.53864e+08	1.33789e+08	7.49508e+07	1.08483e+08	7.72395e+07	1.31991e+08	1.61279e+08	1.20599e+08	1.22e+08	1.28528e+08	1.55079e+08	9.09119e+07	1.79234e+08	1.02751e+08	1.00132e+08	1.15924e+08	1.00841e+08
	FALSE	5-(4-Carboxy-3-methylbutyl)-1,4a-dimethyl-6-methylenedecahydro-1-naphthalenecarboxylic acid	C20 H32 O4	Full match	Full match	No results	No results	Partial match	-1.84	336.229	335.222	2.396	1.79233e+08	45	20	0	83.2	9.2					Reference-7533	No matches found	No matches found	DDA for preferred ion	[M-H]-1	2.8572e+07	3.54059e+07	2.32231e+07	1.56171e+07	1.76026e+07	1.31431e+07	1.70262e+07	2.27741e+07	1.76466e+07	1.73059e+07	4.38829e+07	1.83811e+07	2.26274e+07	1.38713e+07	1.51385e+07	3.10545e+07	2.16777e+07	2.54099e+07	1.9446e+07	1.11545e+07	2.06359e+07	1.74242e+07
	FALSE	NP-004768	C13 H12 O6	No match	Invalid mass	No results	No results	No match	-68194.6	246.056	245.049	1.97	1.78008e+08	1	3	0	93.1	9.7			Endogenous Metabolites; Natural Products/Medicines		Autoprocessed-7994	No matches found	No matches found	DDA for preferred ion	[M-H]-1	1.48483e+07	1.53122e+07	8.96109e+06	1.43715e+07	1.0881e+07	9.77504e+06	7.27242e+07	9.12181e+06	1.75588e+07	1.24464e+07	1.65225e+07	1.65205e+07	1.38496e+08	1.78008e+08	1.05982e+08	2.25527e+07	1.1266e+08	1.43545e+07	1.13166e+07	1.09315e+07	1.35731e+07	1.08251e+07
	FALSE	4-Dodecylbenzenesulfonic acid	C18 H30 O3 S	Full match	Full match	No results	No results	Partial match	-1.4	326.191	325.184	0.784	1.73142e+08	2	3	0	99.7	10			Extractables/Leachables; Personal Care Products/Cosmetics; Industrial Chemicals		Reference-1484	No matches found	No matches found	DDA for preferred ion	[M-H]-1	9.2481e+07	7.4253e+07	7.61542e+07	1.19235e+08	1.11081e+08	1.16316e+08	9.41374e+07	1.14895e+08	8.31458e+07	7.43773e+07	1.12013e+08	1.13103e+08	1.20908e+08	7.62911e+07	4.98449e+07	9.23143e+07	8.73065e+07	1.08884e+08	7.53506e+07	8.0054e+07	2.7924e+06	8.97702e+07
	FALSE	3-Hydroxybutyric acid	C4 H8 O3	Full match	Full match	No results	No results	Not the top hit	-2.32	104.047	103.04	4.768	1.65326e+08	13	2	0	83.1	9.2			Endogenous Metabolites		Reference-199	No matches found	No matches found	DDA for preferred ion	[M-H]-1	5.34257e+07	7.18219e+07	4.73116e+07	7.44419e+07	6.62841e+07	4.83243e+07	6.71556e+07	5.18992e+07	4.37346e+07	7.1398e+07	1.01137e+08	4.10884e+07	9.77733e+07	1.65326e+08	1.20792e+08	1.16678e+08	6.0151e+07	1.21706e+08	5.62835e+07	1.08702e+08	5.76247e+07	5.68971e+07
	FALSE	6-Hydroxycaproic acid	C6 H12 O3	Full match	Full match	No results	No results	Partial match	-1.96	132.078	131.071	5.163	1.64993e+08	20	3	0	97.5	65.4			Endogenous Metabolites	C06103	Reference-1203	No matches found	No matches found	DDA for preferred ion	[M-H]-1	7.45633e+07	7.89231e+07	4.90424e+07	8.73594e+07	6.03666e+07	4.53382e+07	3.10784e+07	4.73498e+07	6.03294e+07	4.59086e+07	6.6523e+07	2.28534e+07	1.64993e+08	1.20978e+08	1.13138e+08	1.30223e+08	6.6402e+07	1.14129e+08	5.86031e+07	9.17637e+07	4.36375e+07	6.45432e+07
	FALSE	Deoxycholic Acid	C24 H40 O4	No match	Invalid mass	No results	No results	No match	-58638.7	369.289	783.577	2.421	1.62143e+08	3	2	0	99.4	10			Endogenous Metabolites		Autoprocessed-8527	No matches found	No matches found	DDA for other ion	[2M+FA-H]-1	6.73164e+07	9.83579e+07	5.23789e+07	3.40279e+07	3.63216e+07	3.3806e+07	3.62669e+07	4.80504e+07	6.25581e+07	6.0547e+07	6.3457e+07	1.62143e+08	3.62622e+07	6.77526e+06	1.41883e+07	3.43622e+07	7.02189e+07	3.86725e+07	1.87001e+07	1.15804e+07	3.47802e+07	2.9373e+07
	FALSE	Deoxycholic Acid	C24 H40 O4	No match	Invalid mass	No results	No results	No results	999996	784.584	783.577	2.44	1.62143e+08	0	2	0	99.8	10			Endogenous Metabolites		Autoprocessed-8527	No matches found	No matches found	DDA for preferred ion	[M-H]-1	6.73164e+07	9.83579e+07	5.23789e+07	3.40279e+07	3.63216e+07	3.3806e+07	3.62669e+07	4.80504e+07	6.25581e+07	6.0547e+07	6.3457e+07	1.62143e+08	3.62622e+07	6.62561e+06	1.41883e+07	3.43622e+07	7.02189e+07	3.86725e+07	1.87001e+07	1.15804e+07	3.47802e+07	2.96312e+07
	FALSE	Dodecyl sulfate	C12 H26 O4 S	No match	Invalid mass	No results	No results	No match	-9.12	266.153	531.299	1.097	1.61864e+08	22	5	0	87.9	9.4			Personal Care Products/Cosmetics	C08031	Reference-1348	No matches found	No matches found	DDA for preferred ion	[2M-H]-1	8.63897e+07	7.80833e+07	4.55121e+07	8.52624e+07	5.80143e+07	5.07847e+07	6.65201e+07	8.39234e+07	1.24163e+08	1.08196e+08	5.70393e+07	8.52219e+07	5.41836e+07	7.93184e+07	6.12577e+07	9.341e+07	9.90225e+07	6.73102e+07	6.63576e+07	1.19484e+08	9.87394e+07	9.65542e+07
	FALSE	(+/-)12(13)-DiHOME	C18 H34 O4	Full match	Full match	No results	No results	Partial match	-1.69	314.245	313.238	1.785	1.58763e+08	5	5	0	95	61.8			Endogenous Metabolites		Autoprocessed-8484	No matches found	No matches found	DDA for preferred ion	[M-H]-1	6.05398e+07	7.18335e+07	3.88423e+07	5.77073e+07	5.86312e+07	5.0823e+07	5.69293e+07	4.45287e+07	5.40814e+07	4.34212e+07	1.12798e+08	9.57453e+07	8.41363e+07	5.16568e+07	4.41783e+07	1.58763e+08	5.11465e+07	6.68603e+07	5.44304e+07	5.71167e+07	5.26357e+07	5.04658e+07
	FALSE	Pyruvic acid	C3 H4 O3	Full match	Full match	No results	Full match	Full match	-2.91	88.0158	87.0085	3.169	1.57678e+08	4	1	0	83.1	9.2			Endogenous Metabolites	C00022	Reference-1264	No matches found	No matches found	DDA for preferred ion	[M-H]-1	5.82982e+07	8.55185e+07	8.84302e+07	9.47358e+07	8.19258e+07	8.40889e+07	1.02922e+08	8.5988e+07	5.3406e+07	8.17749e+07	8.79175e+07	7.13302e+07	9.55852e+07	1.32656e+08	1.57678e+08	8.60417e+07	6.88176e+07	1.25129e+08	7.78351e+07	1.52568e+08	7.21043e+07	5.50418e+07
	FALSE	Linoleic acid	C18 H32 O2	Full match	Full match	No results	Full match	Full match	-1.8	280.24	279.232	8.353	1.57649e+08	12	4	0	99.7	10			Endogenous Metabolites		Autoprocessed-8545	No matches found	No matches found	DDA for preferred ion	[M-H]-1	7.06513e+07	8.98887e+07	5.45217e+07	1.36481e+07	1.17848e+07	3.30879e+07	3.80502e+07	1.09232e+08	1.10582e+08	7.80972e+06	6.49557e+07	5.4654e+07	9.25077e+07	4.21439e+07	6.11193e+07	2.90356e+07	1.57649e+08	3.78016e+07	4.14322e+07	5.35041e+07	4.53397e+07	2.39316e+07
	FALSE	6-Hydroxycaproic acid	C6 H12 O3	Full match	Full match	No results	No results	Partial match	-2.4	132.078	131.071	4.688	1.57492e+08	20	3	0	97.5	65.4			Endogenous Metabolites	C06103	Reference-1203	No matches found	No matches found	DDA for preferred ion	[M-H]-1	2.90167e+07	2.66829e+07	3.60621e+07	3.79589e+07	2.84478e+07	2.06312e+07	1.85439e+07	2.27343e+07	2.4678e+07	2.60488e+07	3.50455e+07	1.61296e+07	7.55476e+07	9.99139e+07	1.57492e+08	6.19469e+07	5.09785e+07	1.50404e+08	3.27945e+07	4.36253e+07	3.57505e+07	2.47155e+07
	FALSE	8-Iso-15-keto-prostaglandin-F2β	C20 H32 O5	Not the top hit	Full match	No results	No results	Not the top hit	-1.88	352.224	351.217	4.429	1.56705e+08	35	19	0	91.2	9.6			Endogenous Metabolites		Reference-4598	No matches found	No matches found	DDA for preferred ion	[M-H]-1	1.43634e+08	1.4439e+08	1.53481e+08	1.21446e+08	1.0911e+08	1.08667e+08	1.00989e+08	1.22964e+08	1.35337e+08	8.36785e+07	1.56705e+08	1.19435e+08	7.55968e+07	1.15015e+08	1.03949e+08	1.30398e+08	1.38175e+08	1.06674e+08	1.04622e+08	7.30382e+07	1.07404e+08	8.39137e+07
	FALSE	Gentisic acid	C7 H6 O4	Full match	Full match	No results	Full match	Not the top hit	-1.7	154.026	153.019	0.748	1.53766e+08	10	5	0	91.8	9.6			Therapeutics/Prescription Drugs; Endogenous Metabolites	C00628	Reference-110	No matches found	No matches found	DDA for preferred ion	[M-H]-1	6.99067e+07	5.61563e+07	4.11739e+07	1.02028e+08	5.46446e+07	3.11114e+07	3.54465e+07	2.54265e+07	3.13521e+07	3.02296e+07	5.88498e+07	2.45488e+07	8.5071e+07	9.02831e+07	7.55099e+07	1.53766e+08	3.61535e+07	5.69637e+07	3.63552e+07	6.23297e+07	2.86107e+07	2.4635e+07
	FALSE	Lauric acid	C12 H24 O2	Full match	Full match	No results	Full match	Full match	-1.8	200.177	199.17	1.245	1.5324e+08	12	1	0	98.2	9.9			Industrial Chemicals; Excipients/Additives/Colorants; Endogenous Metabolites; Personal Care Products/Cosmetics; Therapeutics/Prescription Drugs; Textile Chemicals/Auxiliary/Dyes; Pesticides/Herbicides; Natural Products/Medicines	C02679	Reference-3015	No matches found	No matches found	DDA for preferred ion	[M-H]-1	7.73871e+07	1.20375e+08	2.94359e+07	6.07452e+07	5.83306e+07	5.33544e+07	1.5324e+08	5.08329e+07	4.77821e+07	3.53937e+07	8.61023e+07	5.95685e+07	6.82923e+07	9.72983e+07	5.55672e+07	7.10661e+07	4.76114e+07	5.70865e+07	7.37674e+07	8.92699e+07	8.1734e+07	8.30283e+07
	FALSE	Citraconic acid	C5 H6 O4	Full match	Full match	No results	Full match	Not the top hit	-1.54	130.026	129.019	5.011	1.50036e+08	10	3	0	86.7	9.3			Endogenous Metabolites; Industrial Chemicals	C01732	Reference-351	No matches found	No matches found	DDA for preferred ion	[M-H]-1	1.18312e+08	1.36655e+08	9.3009e+07	1.22571e+08	1.11656e+08	9.38278e+07	9.0593e+07	9.20486e+07	8.7951e+07	1.15049e+08	1.12233e+08	1.32593e+08	9.01799e+07	1.03079e+08	1.32736e+08	1.50036e+08	7.87754e+07	8.02552e+07	7.36045e+07	1.09524e+08	1.22514e+08	8.94792e+07
	FALSE	NP-008309	C11 H13 N O3	Full match	Full match	No results	No results	Partial match	-2.09	207.089	206.082	4.886	1.48909e+08	5	1	0	80.2	67			Endogenous Metabolites; Natural Products/Medicines		Autoprocessed-7714	No matches found	No matches found	DDA for preferred ion	[M-H]-1	7.4445e+07	6.30321e+07	4.48166e+07	7.15019e+07	5.75937e+07	4.09521e+07	7.59553e+07	4.00295e+07	5.6388e+07	6.24245e+07	9.17178e+07	4.95897e+07	7.15157e+07	9.25474e+07	9.31695e+07	1.27615e+08	5.95803e+07	9.10405e+07	4.90885e+07	1.48909e+08	5.17018e+07	5.82074e+07
	FALSE	D-(+)-Tryptophan	C11 H12 N2 O2	Full match	Full match	No results	Full match	Full match	-1.45	204.09	203.082	8.652	1.47474e+08	8	2	0	85.7	67			Endogenous Metabolites	C00806	Reference-415	No matches found	No matches found	DDA for preferred ion	[M-H]-1	2.77014e+07	4.0513e+07	3.02577e+07	4.18956e+07	3.81763e+07	2.84938e+07	3.94741e+07	4.01612e+07	2.35159e+07	4.39681e+07	6.2836e+07	2.69587e+07	3.82109e+07	7.77259e+07	7.05347e+07	7.01719e+07	3.38259e+07	1.11606e+08	4.54785e+07	1.47474e+08	3.28825e+07	2.67607e+07
	FALSE	D-(+)-Tryptophan	C11 H12 N2 O2	No match	Invalid mass	No results	No results	No results	-225419	158.084	203.082	8.655	1.47474e+08	0	2	0	85.7	67			Endogenous Metabolites; Natural Products/Medicines	C00525	Reference-3173	No matches found	No matches found	DDA for other ion	[M+FA-H]-1	2.77014e+07	4.0513e+07	3.02577e+07	4.18956e+07	3.81763e+07	2.84938e+07	3.94741e+07	4.01612e+07	2.35159e+07	4.39681e+07	6.2836e+07	2.69587e+07	3.82109e+07	7.77259e+07	7.05347e+07	7.01719e+07	3.38259e+07	1.11606e+08	4.54785e+07	1.47474e+08	3.28825e+07	2.67607e+07
	FALSE	16-Hydroxyhexadecanoic acid	C16 H32 O3	Full match	Full match	No results	No results	Full match	-1.54	272.235	271.227	1.396	1.47472e+08	13	1	0	97.9	9.9			Endogenous Metabolites	C18218	Reference-2551	No matches found	No matches found	DDA for preferred ion	[M-H]-1	8.22035e+07	7.67401e+07	2.64885e+07	3.24477e+07	3.22438e+07	2.76074e+07	2.81942e+07	3.81084e+07	4.8146e+07	1.13062e+08	7.4484e+07	8.19339e+07	1.2587e+08	3.46526e+07	3.10906e+07	5.02668e+07	6.83313e+07	4.24121e+07	4.12012e+07	5.87699e+07	7.33147e+07	8.05367e+07
	FALSE	2,4-Quinolinediol	C9 H7 N O2	No results	Full match	No results	Partial match	Partial match	-2.19	161.047	160.04	8.027	1.42653e+08	11	3	0	98.6	9.9				C16716	Reference-157	No matches found	No matches found	DDA for preferred ion	[M-H]-1	1.13678e+08	1.19536e+08	8.89719e+07	9.20156e+07	8.31014e+07	7.92491e+07	7.53395e+07	8.02813e+07	8.64655e+07	5.65063e+07	1.01403e+08	7.26843e+07	1.34539e+08	1.42653e+08	7.66365e+07	1.22258e+08	1.27938e+08	1.2677e+08	7.47833e+07	7.84576e+07	9.51333e+07	7.24369e+07
	FALSE	Levulinic acid	C5 H8 O3	Full match	Full match	No results	Partial match	Full match	-2.39	116.047	115.04	4.104	1.41171e+08	14	1	0	81.4	49			Endogenous Metabolites; Extractables/Leachables; Excipients/Additives/Colorants; Industrial Chemicals		Reference-6566	No matches found	No matches found	DDA for preferred ion	[M-H]-1	7.75692e+07	1.07094e+08	8.26952e+07	8.5611e+07	8.37538e+07	8.39699e+07	9.30139e+07	7.52984e+07	5.9867e+07	9.26681e+07	1.06961e+08	7.2028e+07	7.51778e+07	1.06525e+08	1.41171e+08	9.25246e+07	7.25474e+07	1.19577e+08	8.6114e+07	1.18199e+08	6.47854e+07	5.02038e+07
	FALSE	Pyruvic acid	C3 H4 O3	Full match	Full match	No results	Full match	Full match	-3.33	88.0157	87.0085	9.024	1.39952e+08	4	1	0	87.5	9.4			Endogenous Metabolites	C00022	Reference-1264	No matches found	No matches found	DDA for preferred ion	[M-H]-1	3.8609e+07	7.41869e+07	5.7232e+07	5.35709e+07	5.14806e+07	4.50476e+07	6.74277e+07	6.76612e+07	4.08923e+07	5.54693e+07	5.73109e+07	4.95062e+07	6.70603e+07	1.07213e+08	1.00611e+08	5.18136e+07	5.66896e+07	8.18272e+07	5.75212e+07	1.39952e+08	5.06778e+07	5.12649e+07
	FALSE	16-Hydroxyhexadecanoic acid	C16 H32 O3	Full match	Full match	No results	No results	Full match	-1.65	272.235	271.227	1.105	1.39172e+08	13	1	0	92.8	9.6			Endogenous Metabolites	C18218	Reference-2551	No matches found	No matches found	DDA for preferred ion	[M-H]-1	5.03915e+07	1.39172e+08	4.53891e+07	4.80006e+07	5.4326e+07	5.51256e+07	5.07023e+07	6.7867e+07	7.71283e+07	7.82626e+07	1.09917e+08	1.18072e+08	7.30033e+07	4.90419e+07	5.87864e+07	8.3344e+07	9.78236e+07	6.71462e+07	8.01988e+07	9.98385e+07	1.02599e+08	9.91918e+07
	FALSE	2-(5-mercapto-4-methyl-4H-1,2,4-triazol-3-yl)acetonitrile	C5 H6 N4 S	No match	Invalid mass	No results	No results	No results	-11.38	154.03	153.022	2.954	1.39027e+08	0	1	0	88	9.4					Autoprocessed-1028	No matches found	No matches found	DDA for preferred ion	[M-H]-1	1.0944e+08	1.39027e+08	1.08338e+08	1.33579e+08	1.08828e+08	9.03257e+07	4.45064e+07	8.02149e+07	1.00472e+08	4.95448e+07	5.13159e+07	4.25574e+07	7.28804e+07	5.73057e+07	4.50102e+07	6.96272e+07	5.7741e+07	5.22571e+07	5.44197e+07	4.4034e+07	4.27469e+07	1.31158e+08
	FALSE	Arjungenin	C30 H48 O6	Not the top hit	Full match	No results	No results	Partial match	1.14	504.346	503.338	4.178	1.36924e+08	8	2	0	94.5	9.7			Endogenous Metabolites; Natural Products/Medicines		Autoprocessed-7905	No matches found	No matches found	DDA for preferred ion	[M-H]-1	1.13916e+08	2.24219e+07	4.32365e+07	4.03991e+07	3.09951e+07	4.95522e+07	3.24837e+07	1.20387e+08	3.84127e+07	3.98143e+07	2.33918e+07	1.32244e+08	5.7046e+07	2.05754e+07	3.03186e+07	2.99232e+07	4.30598e+07	2.43322e+07	2.52672e+07	5.3324e+07	7.21841e+06	1.36924e+08
	FALSE	Urocanic acid	C6 H6 N2 O2	Full match	Full match	No results	No results	Partial match	-2.12	138.043	137.035	8.764	1.30683e+08	6	2	0	97.2	9.9			Endogenous Metabolites	C00785	Reference-770	No matches found	No matches found	DDA for preferred ion	[M-H]-1	3.80589e+07	7.96557e+07	3.82658e+07	4.46107e+07	3.42909e+07	3.59522e+07	4.17227e+07	4.4273e+07	3.89703e+07	5.56399e+07	1.03008e+08	8.3109e+07	6.06731e+07	5.61893e+07	6.01037e+07	1.30683e+08	4.96042e+07	8.84893e+07	4.76682e+07	1.11896e+08	5.9962e+07	3.97927e+07
	FALSE	Arjungenin	C30 H48 O6	Not the top hit	Full match	No results	No results	Partial match	-1.37	504.344	503.337	2.943	1.29721e+08	8	2	0	96.5	9.8			Endogenous Metabolites; Natural Products/Medicines		Autoprocessed-7905	No matches found	No matches found	DDA for preferred ion	[M-H]-1	9.03088e+07	5.84771e+07	7.033e+07	9.32703e+07	7.65126e+07	6.65472e+07	1.07511e+08	7.85745e+07	6.32357e+07	6.81148e+07	6.63225e+07	8.42164e+07	5.81766e+07	5.57947e+07	7.56125e+07	4.23927e+07	6.12268e+07	5.29559e+07	6.3686e+07	4.96694e+07	5.6755e+07	9.32247e+07
	FALSE	Uracil	C4 H4 N2 O2	Full match	Full match	No results	Full match	Full match	-2.2	112.027	111.02	3.753	1.29653e+08	2	2	0	91.2	9.6			Endogenous Metabolites; Therapeutics/Prescription Drugs; Natural Products/Medicines; Pesticides/Herbicides	C00106	Reference-2531	No matches found	No matches found	DDA for preferred ion	[M-H]-1	4.20256e+07	6.07153e+07	5.94808e+07	3.7286e+07	3.67117e+07	4.11298e+07	3.54788e+07	4.93034e+07	3.74562e+07	3.85983e+07	1.29653e+08	4.40626e+07	8.18001e+07	3.47147e+07	3.55806e+07	3.06899e+07	5.69213e+07	3.91514e+07	1.0216e+08	5.40253e+07	3.74009e+07	3.86495e+07
	FALSE	Glycerophospho-N-palmitoyl ethanolamine	C21 H44 N O7 P	Full match	Full match	No results	No results	Partial match	-1.69	453.285	452.277	4.836	1.27807e+08	2	1	0	99.5	95.5			Endogenous Metabolites; Therapeutics/Prescription Drugs		Reference-2955	No matches found	No matches found	DDA for preferred ion	[M-H]-1	1.02449e+08	4.72331e+07	5.78072e+07	1.08933e+08	7.02455e+07	5.61097e+07	9.03339e+07	1.11281e+08	1.27807e+08	7.01881e+07	4.9132e+07	5.23007e+07	1.05886e+08	1.11791e+08	9.79037e+07	1.12124e+08	7.80979e+07	1.13569e+08	7.43407e+07	6.7339e+07	5.86182e+07	5.65836e+07
	FALSE	Acrylic acid	C3 H4 O2	Full match	Full match	No results	Not the top hit	Partial match	-2.71	72.0209	71.0137	3.778	1.27682e+08	4	1	0	99.4	10			Extractables/Leachables; Textile Chemicals/Auxiliary/Dyes; Personal Care Products/Cosmetics; Industrial Chemicals; Endogenous Metabolites; Excipients/Additives/Colorants	C00511	Reference-2696	No matches found	No matches found	DDA for preferred ion	[M-H]-1	4.99527e+07	1.27682e+08	4.56071e+07	4.96526e+07	5.64019e+07	9.76791e+07	8.56984e+07	1.01894e+08	2.91016e+07	7.95578e+07	1.15679e+08	1.13738e+08	5.83907e+07	4.40264e+07	7.12925e+07	6.02735e+06	4.67438e+07	8.1832e+07	8.38445e+07	1.20304e+08	6.35137e+07	4.23506e+07
	FALSE	4-Chlorophenol	C6 H5 Cl O	No match	Invalid mass	No results	No results	No match	10.27	128.004	126.997	1.49	1.22665e+08	1	1	0	86.7	9.3			Therapeutics/Prescription Drugs; Industrial Chemicals; Endogenous Metabolites; Pesticides/Herbicides	D00149	Reference-3048	No matches found	No matches found	DDA for preferred ion	[M-H]-1	1.02899e+07	7.85749e+07	1.42047e+07	1.2416e+07	2.30945e+07	2.77811e+07	2.7427e+07	3.32821e+07	9.69716e+06	9.39315e+07	6.23914e+07	7.2922e+07	3.66965e+07	2.4773e+07	2.75819e+07	5.04228e+07	1.1373e+07	2.46e+07	5.14058e+07	1.22665e+08	5.46057e+07	1.73865e+07
	FALSE	1-{[3-(4-fluorophenyl)-1H-pyrazol-4-yl]methyl}-4-(2-methoxyphenyl)piperidine	C22 H24 F N3 O	No match	Invalid mass	No results	No results	No results	-10.41	365.187	364.179	1.692	1.20869e+08	0	1	0	88.2	9.4					Autoprocessed-1055	No matches found	No matches found	DDA for preferred ion	[M-H]-1	1.20869e+08	8.94574e+06	1.31883e+07	6.88893e+06	5.43674e+06	1.16297e+07	2.21806e+07	1.78289e+07	9.53236e+06	2.4854e+07	1.66966e+07	1.0128e+07	4.18269e+06	4.25921e+07	2.83482e+07	3.83885e+06	2.74975e+07	5.14523e+06	9.42933e+06	1.75347e+07	2.03951e+07	1.64599e+07
	FALSE	DL-β-Leucine	C6 H13 N O2	Full match	Full match	No results	Partial match	Not the top hit	-1.79	131.094	130.087	10.687	1.17745e+08	17	1	0	92	9.6			Endogenous Metabolites	C02486	Reference-414	No matches found	No matches found	DDA for preferred ion	[M-H]-1	9.60292e+06	1.17745e+08	1.13113e+07	1.09506e+07	1.06275e+07	9.27441e+06	9.94633e+06	1.00551e+07	7.99304e+06	1.16579e+07	1.12496e+07	9.03647e+06	8.31894e+06	1.16292e+07	1.63037e+07	1.1466e+07	7.62784e+06	1.29671e+07	1.02218e+07	1.83018e+07	8.76503e+06	7.87025e+06
	FALSE	Pentadecanoic acid	C15 H30 O2	Full match	Full match	No results	No results	Full match	-2.79	242.224	241.217	6.94	1.17454e+08	14	2	0	95.6	9.8			Endogenous Metabolites		Autoprocessed-8571	No matches found	No matches found	DDA for preferred ion	[M-H]-1	2.05552e+07	1.17454e+08	1.54165e+07	7.84075e+06	2.28665e+07	6.73928e+06	1.71609e+07	6.28889e+06	1.13336e+07	5.38084e+06	8.06474e+07	2.08363e+07	1.23404e+07	9.05258e+06	6.7175e+06	1.80464e+07	1.13775e+07	6.02245e+07	1.68727e+07	7.82775e+06	9.13129e+06	1.71485e+07
	FALSE	5-[({(2R,4S,5R)-5-[1-Methyl-3-(2-thienyl)-1H-pyrazol-5-yl]-1-azabicyclo[2.2.2]oct-2-yl}methyl)amino]-5-oxopentanoic acid	C21 H28 N4 O3 S	No match	Invalid mass	No results	No results	No results	-5.24	416.186	415.179	2.403	1.17146e+08	0	1	0	82.2	49.2					Reference-9054	No matches found	No matches found	DDA for preferred ion	[M-H]-1	1.09531e+08	8.97665e+07	6.92407e+07	9.89521e+07	7.02254e+07	5.38751e+07	4.15875e+07	9.36266e+07	1.08497e+08	8.34595e+07	8.04503e+07	7.67472e+07	1.17146e+08	9.19612e+07	7.29322e+07	1.10331e+08	1.01385e+08	8.46791e+07	7.47404e+07	5.4766e+07	5.72259e+07	1.00027e+08
	FALSE	Lithocholic Acid	C24 H40 O3	Full match	Full match	No results	No results	Full match	-1.97	376.297	375.29	1.328	1.15149e+08	6	3	0	97.1	9.9			Endogenous Metabolites		Autoprocessed-8555	No matches found	No matches found	DDA for preferred ion	[M-H]-1	4.5257e+07	9.99221e+07	6.85895e+07	7.19278e+07	7.33441e+07	7.16145e+07	4.21379e+07	6.54486e+07	8.74666e+07	8.13162e+07	7.65461e+07	1.15149e+08	8.53821e+07	4.03235e+07	4.26307e+07	9.71484e+07	6.36433e+07	7.01071e+07	4.97251e+07	4.62013e+07	7.0288e+07	5.10885e+07
	FALSE	Guanine	C5 H5 N5 O	Full match	Full match	No results	Full match	Full match	-1.77	151.049	150.042	7.229	1.14834e+08	4	1	0	98.2	96			Endogenous Metabolites	C00242	Reference-436	No matches found	No matches found	DDA for preferred ion	[M-H]-1	7.13747e+07	9.35253e+07	9.56996e+07	1.14834e+08	9.32003e+07	8.06298e+07	8.91232e+07	8.55341e+07	8.02846e+07	9.53699e+07	6.65481e+07	4.55674e+07	9.24551e+07	1.09594e+08	1.11838e+08	7.34381e+07	1.0235e+08	8.68742e+07	7.78197e+07	1.06476e+08	9.38181e+07	7.17402e+07
	FALSE	16-Hydroxyhexadecanoic acid	C16 H32 O3	Full match	Full match	No results	No results	Full match	-1.5	272.235	271.227	1.483	1.14136e+08	13	1	0	97.9	9.9			Endogenous Metabolites	C18218	Reference-2551	No matches found	No matches found	DDA for preferred ion	[M-H]-1	4.1522e+07	1.14136e+08	3.59089e+07	4.60718e+07	5.14872e+07	4.69725e+07	5.12978e+07	6.22167e+07	8.11728e+07	5.23544e+07	1.102e+08	1.06111e+08	7.97699e+07	5.57684e+07	4.70197e+07	8.65356e+07	8.88856e+07	6.77574e+07	6.05901e+07	6.13948e+07	8.31135e+07	7.827e+07
	FALSE	NP-008607	C28 H46 O7	No results	Invalid mass	No results	No results	No results	-463621	265.145	529.283	5.848	1.11114e+08	0	1	0	90.7	52.7			Endogenous Metabolites; Natural Products/Medicines		Autoprocessed-7707	No matches found	No matches found	DDA for other ion	[2M-H]-1	4.91589e+07	6.55822e+07	6.97163e+07	5.96581e+07	5.58874e+07	5.45289e+07	4.18025e+07	8.40135e+07	5.64582e+07	6.22485e+07	6.76113e+07	1.10441e+08	6.46982e+07	6.88084e+07	5.75399e+07	6.83481e+07	1.11114e+08	7.25704e+07	7.27485e+07	4.98586e+07	8.22156e+07	8.63845e+07
	FALSE	NP-008607	C28 H46 O7	No match	Invalid mass	No results	No results	No match	72758.1	530.29	529.283	5.857	1.11114e+08	2	1	0	90.7	52.7			Endogenous Metabolites; Natural Products/Medicines		Autoprocessed-7707	No matches found	No matches found	DDA for preferred ion	[M-H]-1	4.91589e+07	6.55822e+07	6.97163e+07	5.96581e+07	5.58874e+07	5.45289e+07	4.18025e+07	8.40135e+07	5.64582e+07	2.67251e+07	6.76113e+07	1.10441e+08	6.46982e+07	6.88084e+07	5.75399e+07	6.83481e+07	1.11114e+08	7.25704e+07	7.27485e+07	4.98586e+07	8.22156e+07	8.63845e+07
	FALSE	Suberic acid	C8 H14 O4	Full match	Full match	No results	No results	Full match	-1.95	174.089	173.082	10.749	1.10693e+08	7	1	0	99.2	100			Endogenous Metabolites	C08278	Reference-1393	No matches found	No matches found	DDA for preferred ion	[M-H]-1	4.46714e+07	1.10693e+08	3.9122e+07	3.6095e+07	3.70711e+07	4.00748e+07	3.15083e+07	5.24229e+07	4.29214e+07	3.38499e+07	8.50506e+07	5.11066e+07	7.15761e+07	9.36232e+07	5.33028e+07	8.94475e+07	8.43739e+07	6.94692e+07	4.2318e+07	6.28286e+07	6.11643e+07	4.90898e+07
	FALSE	Methylsuccinic acid	C5 H8 O4	Full match	Full match	No results	Partial match	Not the top hit	-2.29	132.042	131.035	6.309	1.10403e+08	16	3	0	90.5	52.5			Endogenous Metabolites		Reference-1337	No matches found	No matches found	DDA for preferred ion	[M-H]-1	3.02528e+07	9.17387e+07	4.11828e+07	4.60579e+07	4.5075e+07	3.19899e+07	5.41287e+07	3.74461e+07	2.67118e+07	3.51206e+07	7.86594e+07	4.3982e+07	5.31198e+07	8.16246e+07	6.77445e+07	6.01433e+07	4.56845e+07	6.64062e+07	3.24911e+07	1.10403e+08	5.79245e+07	2.82018e+07
	FALSE	α-Cyano-3-hydroxycinnamic acid	C10 H7 N O3	Full match	Full match	No results	Partial match	Partial match	-1.48	189.042	188.035	6.705	1.10188e+08	4	6	0	98.9	9.9	63.6				Reference-1757	No matches found	No matches found	DDA for preferred ion	[M-H]-1	9.63475e+07	9.77084e+07	4.96613e+07	8.83324e+07	7.07541e+07	6.71645e+07	5.45163e+07	5.38061e+07	7.98106e+07	4.48857e+07	6.56733e+07	5.58827e+07	1.01928e+08	9.80214e+07	7.2408e+07	1.10188e+08	8.72212e+07	9.1644e+07	6.01173e+07	5.91662e+07	6.94177e+07	4.87726e+07
	FALSE	13(S)-HOTrE	C18 H30 O3	Full match	Full match	No results	Partial match	Not the top hit	-1.61	294.219	293.212	1.286	1.07202e+08	25	3	0	91.3	54.1			Endogenous Metabolites		Autoprocessed-8546	No matches found	No matches found	DDA for preferred ion	[M-H]-1	5.26156e+07	4.83618e+07	4.49251e+07	5.30257e+07	4.7428e+07	7.20556e+07	6.78981e+07	3.48444e+07	5.95778e+07	5.03763e+07	8.04163e+07	9.51543e+07	5.82649e+07	6.76332e+07	5.49733e+07	7.249e+07	7.71612e+07	7.56995e+07	4.33036e+07	3.74718e+07	4.23963e+07	7.37116e+07
	FALSE	5-(4-Carboxy-3-methylbutyl)-1,4a-dimethyl-6-methylenedecahydro-1-naphthalenecarboxylic acid	C20 H32 O4	Unused	Invalid mass	No results	No results	No match	53564.5	354.24	353.233	2.418	1.03243e+08	24	20	0	83.2	9.2					Reference-7533	No matches found	No matches found	DDA for other ion	[M-H]-1	3.01749e+07	2.63856e+07	2.48222e+07	2.182e+07	1.8724e+07	2.51692e+07	2.05661e+07	2.60037e+07	3.45835e+07	4.06256e+07	7.2664e+07	5.00899e+07	5.50861e+07	2.32138e+07	3.94766e+07	2.48504e+07	3.39771e+07	3.313e+07	3.15704e+07	3.51195e+07	2.78271e+07	2.39707e+07
	FALSE	2-Aminoflubendazole	C14 H10 F N3 O	No match	Invalid mass	No results	No results	No results	-235316	195.056	194.049	3.248	1.0121e+08	0	4	0	90.6	9.5	57.3		Therapeutics/Prescription Drugs		Reference-4907	No matches found	No matches found	DDA for other ion	[M-H]-1	5.94081e+06	2.84481e+07	1.95513e+07	1.15607e+07	1.10691e+07	8.02453e+06	2.49545e+07	2.61156e+07	2.26894e+07	7.8876e+07	4.10735e+07	1.53457e+07	1.76547e+07	1.0121e+08	5.12755e+07	1.86581e+07	2.79519e+07	3.45206e+07	5.40007e+06	2.83234e+07	6.25001e+07	3.02226e+07
	FALSE	Vanillin	C8 H8 O3	Full match	Full match	No results	Not the top hit	Full match	-2.31	152.047	151.04	1.194	9.74874e+07	32	11	0	86.7	9.3			Endogenous Metabolites; Excipients/Additives/Colorants; Personal Care Products/Cosmetics; Industrial Chemicals	D00091	Reference-2529	No matches found	No matches found	DDA for preferred ion	[M-H]-1	3.52638e+07	4.46744e+07	3.31791e+07	3.61627e+07	3.24371e+07	3.34262e+07	2.90876e+07	2.47499e+07	2.52323e+07	1.25539e+07	4.42036e+07	4.02696e+07	4.58925e+07	4.3769e+07	9.74874e+07	5.87406e+07	3.54829e+07	9.00345e+07	1.48373e+07	3.92986e+07	3.93339e+07	3.4631e+07
	FALSE	Arjungenin	C30 H48 O6	Not the top hit	Full match	No results	No results	Partial match	-1.78	504.344	503.337	2.439	9.74516e+07	8	2	0	86.6	9.3			Endogenous Metabolites; Natural Products/Medicines		Autoprocessed-7905	No matches found	No matches found	DDA for preferred ion	[M-H]-1	1.45992e+07	1.20835e+07	1.54967e+07	1.37155e+07	1.26806e+07	1.26267e+07	3.17976e+07	1.89141e+07	1.25117e+07	1.06906e+07	1.24175e+07	1.45504e+07	1.30767e+07	6.44189e+06	1.42244e+07	1.00225e+07	1.33448e+07	1.42472e+07	9.41232e+06	1.01063e+07	8.94505e+06	1.14415e+07
	FALSE	Methanesulfonic acid	C H4 O3 S	No match	Full match	No results	No results	Full match	-2.81	95.9878	94.9806	2.842	9.52972e+07	2	1	0	88.6	9.4			Industrial Chemicals	C08091	Reference-1324	No matches found	No matches found	DDA for preferred ion	[M-H]-1	8.00586e+07	3.58739e+07	4.43845e+07	6.42611e+07	4.32855e+07	3.9364e+07	5.16014e+07	5.33557e+07	5.62942e+07	8.00772e+07	5.98418e+07	2.63518e+07	3.84128e+07	6.75736e+07	6.85975e+07	7.25814e+07	7.75108e+07	4.71068e+06	4.42821e+07	4.77975e+07	7.03951e+07	4.97359e+07
	FALSE	Pyrogallol	C6 H6 O3	Full match	Full match	No results	No results	Full match	-2.43	126.031	125.024	2.517	9.4344e+07	9	2	0	90.6	9.5			Personal Care Products/Cosmetics	C01108	Reference-571	No matches found	No matches found	DDA for preferred ion	[M-H]-1	8.57493e+07	7.85586e+07	7.53194e+07	9.39121e+07	9.4344e+07	8.21064e+07	5.77894e+07	7.95808e+07	8.70218e+07	5.46114e+07	4.79929e+07	4.93303e+07	9.18207e+07	6.4562e+07	7.36709e+07	6.54896e+07	6.00794e+07	6.02754e+07	5.98455e+07	4.2412e+07	6.02566e+07	6.39611e+07
	FALSE	α,α-Trehalose	C12 H22 O11	Full match	Full match	No results	Full match	Not the top hit	-2.11	342.115	341.108	11.496	9.35945e+07	59	14	0	95.5	85.7	58.5		Endogenous Metabolites	C01083	Reference-1481	No matches found	No matches found	DDA for preferred ion	[M-H]-1	6.02379e+06	8.28057e+06	6.3218e+06	5.42347e+06	6.06427e+06	6.72527e+06	5.85507e+06	5.12561e+06	3.81123e+06	3.19072e+06	4.12286e+06	6.0626e+06	5.3895e+06	1.1607e+07	8.15643e+06	3.95512e+06	7.75389e+06	1.09858e+07	6.25155e+06	3.63806e+06	6.47995e+06	3.65345e+06
	FALSE	2-(2'-Hydroxy-3,5'-di-tert-butylphenyl)-5-chlorobenzotriazole	C20 H24 Cl N3 O	No match	Full match	No results	No results	Full match	-0.99	357.16	356.153	1.574	9.30998e+07	1	2	0	91.6	9.6			Extractables/Leachables		Reference-7388	No matches found	No matches found	DDA for preferred ion	[M-H]-1	5.88382e+07	5.62416e+06	4.67212e+06	7.57627e+06	7.63904e+06	1.27343e+07	2.96197e+07	1.71725e+07	1.81586e+07	5.8991e+07	2.70416e+07	1.53745e+07	4.14679e+06	3.60584e+07	9.30998e+07	3.99427e+06	4.56492e+07	1.87613e+06	1.04724e+07	2.90638e+07	6.97285e+06	1.36333e+07
	FALSE	4-Indolecarbaldehyde	C9 H7 N O	Full match	Full match	No results	No results	Partial match	-1.92	145.052	144.045	4.94	9.29654e+07	8	1	0	97.4	9.9					Reference-1723	No matches found	No matches found	DDA for preferred ion	[M-H]-1	6.55136e+07	2.69262e+07	5.0155e+07	7.08831e+07	5.5116e+07	3.89347e+07	7.12655e+07	5.26119e+07	5.42804e+07	3.92893e+07	3.27334e+07	3.5474e+07	8.04025e+07	6.71377e+07	6.65364e+07	7.4475e+07	2.76477e+07	7.20044e+07	3.71414e+07	3.58872e+07	4.32154e+07	5.1431e+07
	FALSE	6-Chloro-5-methyl-1H-1,2,3-benzotriazole	C7 H6 Cl N3	No match	Full match	No results	No results	No match	-0.84	167.025	166.018	4.144	9.25335e+07	2	4	0	89.3	9.5					Reference-3729	No matches found	No matches found	DDA for preferred ion	[M-H]-1	5.9968e+07	3.11005e+07	3.13903e+07	5.21764e+07	3.52578e+07	5.21505e+07	4.70961e+07	4.68076e+07	5.935e+07	5.16968e+07	2.103e+07	2.80128e+07	2.75923e+07	5.30158e+07	3.1702e+07	5.13524e+07	3.09701e+07	3.95532e+07	2.52617e+07	2.90819e+07	3.00216e+07	9.25335e+07
	FALSE	Suberic acid	C8 H14 O4	Full match	Full match	No results	No results	Full match	-2.09	174.089	173.082	8.656	8.95007e+07	7	4	0	91.8	9.6	54.9		Endogenous Metabolites	C08278	Reference-1393	No matches found	No matches found	DDA for preferred ion	[M-H]-1	5.80265e+07	8.95007e+07	5.07891e+07	6.21431e+07	5.02339e+07	5.23293e+07	2.90009e+07	5.09322e+07	6.27903e+07	3.73469e+07	4.54713e+07	4.80295e+07	5.7274e+07	5.3443e+07	3.46528e+07	5.39076e+07	4.79131e+07	4.70393e+07	3.92914e+07	3.71351e+07	3.68519e+07	5.36765e+07
	FALSE	4-benzyl 2-ethyl 3-(2-ethoxy-2-oxoethyl)-5-methyl-1H-pyrrole-2,4-dicarboxylate	C20 H23 N O6	No match	Invalid mass	No results	No results	No results	6.05	373.155	372.148	2.982	8.92139e+07	0	3	0	82.3	67					Autoprocessed-247	No matches found	No matches found	DDA for preferred ion	[M-H]-1	8.92139e+07	2.15994e+07	3.97462e+07	1.27012e+07	8.29575e+06	1.03047e+07	1.92231e+07	2.54058e+07	1.02316e+07	5.36024e+07	3.32052e+07	9.57318e+06	6.91495e+06	2.67103e+07	4.71359e+07	3.47332e+06	3.40803e+07	8.78691e+06	1.09649e+07	2.4395e+07	2.61139e+07	1.86178e+07
	FALSE	N-Acetylornithine	C7 H14 N2 O3	Full match	Full match	No results	Full match	Full match	-2.32	174.1	173.093	11.633	8.28311e+07	9	1	0	89.5	9.5			Endogenous Metabolites		Reference-513	No matches found	No matches found	DDA for preferred ion	[M-H]-1	3.48065e+07	6.77057e+07	2.57121e+07	3.67147e+07	3.37486e+07	3.10615e+07	2.32212e+07	3.87662e+07	4.05346e+07	4.47027e+07	7.77043e+07	6.47734e+07	5.9023e+07	8.09585e+07	5.50287e+07	5.88664e+07	4.03683e+07	6.0973e+07	3.6616e+07	6.41605e+07	5.34902e+07	4.43167e+07
	FALSE	N-Acetylornithine	C7 H14 N2 O3	No match	Invalid mass	No results	No results	No match	-344752	114.079	173.093	11.632	8.28311e+07	2	1	0	89.5	9.5			Endogenous Metabolites		Reference-513	No matches found	No matches found	DDA for other ion	[M-H+HAc]-1	3.48065e+07	6.77057e+07	2.57121e+07	3.67147e+07	3.37486e+07	3.10615e+07	2.32212e+07	3.87662e+07	4.05346e+07	4.47027e+07	7.77043e+07	6.47734e+07	5.9023e+07	8.09585e+07	5.50287e+07	5.88664e+07	4.03683e+07	6.0973e+07	3.6616e+07	6.41605e+07	5.34902e+07	4.43167e+07
	FALSE	9(Z),11(E)-Conjugated linoleic acid	C18 H32 O2	Full match	Full match	No results	Partial match	Not the top hit	-2.43	280.24	279.232	8.149	8.23174e+07	12	4	0	99.7	10				C04056	Reference-6905	No matches found	No matches found	DDA for preferred ion	[M-H]-1	1.32748e+07	7.00448e+07	2.31931e+07	3.24032e+07	1.17848e+07	1.03184e+07	4.03232e+07	8.23174e+07	3.42096e+07	1.62341e+07	2.36936e+07	1.49114e+07	5.98873e+07	4.1201e+07	2.27418e+07	7.88289e+07	4.68845e+07	2.75638e+07	4.37731e+07	2.52023e+07	3.42651e+07	2.52035e+07
	FALSE	Crotonic acid	C4 H6 O2	Full match	Full match	No results	Full match	Not the top hit	-2.63	86.0366	85.0293	2.17	8.22423e+07	8	2	0	96.8	9.8			Extractables/Leachables; Excipients/Additives/Colorants; Industrial Chemicals; Endogenous Metabolites	C01771	Reference-2732	No matches found	No matches found	DDA for preferred ion	[M-H]-1	4.86229e+07	4.798e+07	5.27311e+07	6.37042e+07	8.22423e+07	3.8065e+07	3.30289e+07	7.71188e+07	7.34539e+07	3.13836e+07	1.57943e+07	4.71443e+06	4.78229e+07	7.9385e+07	4.19584e+07	3.59445e+07	4.02584e+07	5.33294e+07	2.75074e+07	9.90089e+06	3.47931e+07	3.95952e+07
	FALSE	Hydrocinnamic acid	C9 H10 O2	Full match	Full match	No results	Full match	Full match	-2.51	150.068	149.06	2.42	8.19451e+07	36	2	0	83.3	9.2			Personal Care Products/Cosmetics; Excipients/Additives/Colorants	C05629	Reference-1300	No matches found	No matches found	DDA for preferred ion	[M-H]-1	3.22847e+07	3.28674e+07	2.11247e+07	3.46984e+07	2.27251e+07	1.98532e+07	1.03655e+07	2.36295e+07	2.46238e+07	4.14948e+07	4.62523e+07	3.30767e+07	7.93671e+07	5.09338e+07	2.85706e+07	8.19451e+07	2.11893e+07	2.27475e+07	4.03742e+07	5.79066e+07	2.70909e+07	3.10583e+07
	FALSE	?17-6-keto Prostaglandin F1?	C20 H32 O6	Unused	Invalid mass	No results	No results	No match	-48914.4	350.209	349.201	4.845	8.03465e+07	19	11	0	87.5	50.7			Endogenous Metabolites		Autoprocessed-8447	No matches found	No matches found	DDA for preferred ion	[M-H]-1	5.75657e+07	5.85439e+07	6.39389e+07	4.21908e+07	4.99108e+07	4.68828e+07	4.98769e+07	6.38615e+07	5.65261e+07	4.12822e+07	6.90337e+07	5.79503e+07	5.87536e+07	5.71005e+07	5.85736e+07	8.03465e+07	6.64271e+07	4.80087e+07	4.62623e+07	6.00589e+07	4.98113e+07	5.61192e+07
	FALSE	Tridecylic acid	C13 H26 O2	Full match	Full match	No results	No results	Not the top hit	-1.92	214.193	213.186	1.111	7.98388e+07	13	1	0	84.5	9.2			Endogenous Metabolites	C17076	Reference-1500	No matches found	No matches found	DDA for preferred ion	[M-H]-1	2.06091e+07	4.85046e+07	4.15238e+07	2.17672e+07	2.90822e+07	2.69562e+07	2.02171e+07	4.97449e+07	2.24366e+07	4.83867e+07	3.83142e+07	2.73974e+07	7.98388e+07	5.03691e+07	2.42084e+07	4.542e+07	3.44458e+07	3.1316e+07	3.63826e+07	6.6173e+07	3.95621e+07	3.43839e+07
	FALSE	2-(5-mercapto-4-methyl-4H-1,2,4-triazol-3-yl)acetonitrile	C5 H6 N4 S	No match	Invalid mass	No results	No results	No results	-10.81	154.03	153.022	3.891	7.30471e+07	0	1	0	86	50.2					Autoprocessed-1028	No matches found	No matches found	DDA for preferred ion	[M-H]-1	7.30471e+07	7.01463e+07	6.24348e+07	7.01412e+07	5.42986e+07	4.63504e+07	2.27099e+07	5.24482e+07	5.68597e+07	3.96319e+07	4.72598e+07	2.73358e+07	4.80111e+07	3.32648e+07	3.73208e+07	4.84382e+07	4.54529e+07	2.93969e+07	4.46669e+07	3.15205e+07	4.1012e+07	7.15051e+07
	FALSE	NP-020283	C29 H46 O6	No match	Invalid mass	No results	No results	No results	-36733.4	472.318	471.311	1.688	7.24453e+07	0	1	0	91.9	9.6			Endogenous Metabolites; Natural Products/Medicines		Autoprocessed-5746	No matches found	No matches found	DDA for preferred ion	[M-H]-1	3.00951e+07	2.51897e+07	3.29138e+07	4.44459e+07	3.89845e+07	2.97006e+07	3.58352e+07	3.424e+07	4.31572e+07	5.32889e+07	4.19545e+07	3.44676e+07	6.33039e+07	4.21665e+07	4.77977e+07	5.56022e+07	5.09898e+07	4.40784e+07	3.72724e+07	7.24453e+07	2.19282e+07	4.13887e+07
	FALSE	4-Indolecarbaldehyde	C9 H7 N O	Full match	Full match	No results	No results	Partial match	-2.76	145.052	144.045	1.064	7.24225e+07	8	1	0	99.5	10					Reference-1723	No matches found	No matches found	DDA for preferred ion	[M-H]-1	2.38917e+07	3.42507e+07	2.09484e+07	3.045e+07	2.72181e+07	2.84032e+07	2.92085e+07	2.89252e+07	2.71177e+07	3.8791e+07	3.71155e+07	4.13169e+07	4.30061e+07	5.87576e+07	5.17248e+07	5.52209e+07	6.70926e+07	5.11861e+07	5.3615e+07	7.24225e+07	5.21614e+07	3.65193e+07
	FALSE	(4aS,5R,6S,8aS)-5-[(3E)-5-methoxy-3-methyl-5-oxopent-3-en-1-yl]-5,6,8a-trimethyl-3,4,4a,5,6,7,8,8a-octahydronaphthalene-1-carboxylic acid	C21 H32 O4	No match	Invalid mass	No results	No results	No results	2865.9	349.228	348.221	0.992	7.10765e+07	0	1	0	93.6	9.7			Endogenous Metabolites; Natural Products/Medicines		Autoprocessed-1763	No matches found	No matches found	DDA for preferred ion	[M-H]-1	1.3832e+07	5.98156e+06	6.93354e+06	1.47007e+07	8.87726e+06	1.01877e+07	1.90421e+07	4.20732e+07	3.94781e+07	3.89638e+07	1.90679e+07	4.87059e+07	7.78418e+06	1.61112e+07	1.68265e+07	1.1057e+07	2.54666e+07	1.59403e+07	1.39855e+07	1.29612e+07	1.50919e+07	3.69519e+07
	FALSE	β-Muricholic acid	C24 H40 O5	No match	Invalid mass	No results	No results	No results	112677	454.292	453.285	4.294	6.86461e+07	0	2	0	95.2	9.8			Endogenous Metabolites	C17726	Reference-9852	No matches found	No matches found	DDA for preferred ion	[M-H]-1	3.86233e+07	2.0451e+07	3.8445e+07	1.1257e+07	3.38044e+07	2.52958e+07	5.02957e+07	4.68613e+07	4.23544e+07	6.02677e+07	3.30305e+07	5.38707e+07	2.36137e+07	4.4097e+07	4.02768e+07	2.9618e+07	6.01197e+07	2.8731e+07	3.79313e+07	5.38624e+07	6.16712e+07	5.57589e+07
	FALSE	Decanoic acid	C10 H20 O2	Full match	Full match	No results	No results	Full match	-1.74	172.146	171.139	1.32	6.86381e+07	34	1	0	87.1	9.4			Endogenous Metabolites; Extractables/Leachables; Industrial Chemicals; Personal Care Products/Cosmetics; Excipients/Additives/Colorants; Textile Chemicals/Auxiliary/Dyes; Pesticides/Herbicides	C01571	Reference-2726	No matches found	No matches found	DDA for preferred ion	[M-H]-1	4.03884e+07	3.73481e+07	2.2115e+07	3.4571e+07	3.38439e+07	2.80903e+07	6.86381e+07	1.92627e+07	1.79581e+07	1.32449e+07	2.72083e+07	2.26564e+07	2.52294e+07	3.36572e+07	2.95971e+07	2.49341e+07	2.38184e+07	2.44505e+07	3.04033e+07	3.72141e+07	2.99751e+07	3.24664e+07
	FALSE	Glutaric acid	C5 H8 O4	Full match	Full match	No results	Not the top hit	Full match	-2.02	132.042	131.035	11.896	6.75891e+07	16	3	0	95.3	62.2			Endogenous Metabolites; Industrial Chemicals	C00489	Reference-1231	No matches found	No matches found	DDA for preferred ion	[M-H]-1	1.2451e+07	5.74706e+07	9.22032e+06	1.27504e+07	1.25327e+07	1.20108e+07	9.58172e+06	1.57944e+07	1.0741e+07	1.99778e+07	5.11767e+07	2.15912e+07	2.62997e+07	2.61536e+07	2.72154e+07	6.75891e+07	2.46256e+07	2.23575e+07	1.61645e+07	4.9525e+07	3.48431e+07	1.83472e+07
	FALSE	Acrylic acid	C3 H4 O2	No results	Full match	No results	Not the top hit	Partial match	-3.86	72.0208	71.0136	3.111	6.74362e+07	4	1	0	99.3	10			Extractables/Leachables; Textile Chemicals/Auxiliary/Dyes; Personal Care Products/Cosmetics; Industrial Chemicals; Endogenous Metabolites; Excipients/Additives/Colorants	C00511	Reference-2696	No matches found	No matches found	DDA for preferred ion	[M-H]-1	1.43e+07	1.88617e+07	2.02869e+07	2.56915e+07	3.0093e+07	1.87406e+07	2.35307e+07	2.19577e+07	1.12221e+07	1.65405e+07	1.95531e+07	2.49096e+07	2.44859e+07	3.90427e+07	2.86747e+07	2.42737e+07	2.51225e+07	2.60503e+07	2.97972e+07	6.74362e+07	1.64537e+07	1.112e+07
	FALSE	β-D-Glucopyranuronic acid	C6 H10 O7	Full match	Full match	No results	Not the top hit	Not the top hit	-2.15	194.042	193.035	11.947	6.73123e+07	12	4	0	95.3	100	58.7		Endogenous Metabolites	C08350	Reference-1214	No matches found	No matches found	DDA for preferred ion	[M-H]-1	1.6e+07	2.83171e+07	1.88747e+07	1.96459e+07	1.81397e+07	1.55257e+07	2.1306e+07	2.65716e+07	1.27957e+07	2.48827e+07	4.01444e+07	1.94883e+07	1.49937e+07	3.46168e+07	4.56847e+07	4.0323e+07	2.45529e+07	2.51383e+07	2.1473e+07	6.73123e+07	2.59493e+07	1.70762e+07
	FALSE	4-Indolecarbaldehyde	C9 H7 N O	Full match	Full match	No results	No results	Partial match	-1.82	145.053	144.045	6.218	6.65825e+07	8	1	0	95.1	9.8					Reference-1723	No matches found	No matches found	DDA for preferred ion	[M-H]-1	4.18113e+07	5.89951e+07	4.05444e+07	5.10467e+07	4.16402e+07	4.07711e+07	6.36516e+07	6.26959e+07	4.38178e+07	1.1904e+07	5.18982e+07	1.27745e+07	6.25235e+07	5.70357e+07	6.65825e+07	4.39852e+07	5.02929e+07	5.58543e+07	5.57455e+07	6.43834e+07	1.31327e+07	5.84559e+07
	FALSE	6'-Methoxy-2'-methyl-3',4',6,8-tetrahydro-2'H-spiro[indeno[4,5-d][1,3]dioxole-7,1'-isoquinoline]-7',8-diol 2'-oxide	C20 H21 N O6	No match	Invalid mass	No results	No results	No results	6.98	371.139	370.132	1.992	6.55529e+07	0	1	0	81.1	9.1					Reference-7836	No matches found	No matches found	DDA for preferred ion	[M-H]-1	6.55529e+07	2.10535e+07	2.49079e+07	1.75188e+07	3.44845e+06	2.80206e+07	3.92725e+07	3.38194e+07	1.88758e+07	5.21712e+07	2.67194e+07	2.34031e+07	8.28747e+06	4.02966e+07	6.45293e+07	6.09704e+06	4.72113e+07	1.05941e+07	2.74758e+07	2.12554e+07	3.1115e+07	3.85968e+07
	FALSE	β-Muricholic acid	C24 H40 O5	Full match	Full match	No results	No results	Not the top hit	-2.38	408.287	407.279	7.448	6.50748e+07	20	5	0	99.3	10			Endogenous Metabolites		Autoprocessed-8518	No matches found	No matches found	DDA for preferred ion	[M-H]-1	2.84624e+07	1.57315e+07	1.99218e+07	2.50572e+07	1.92254e+07	1.4311e+07	1.75416e+07	2.75402e+07	2.9734e+07	4.86783e+07	2.72502e+07	3.16724e+07	1.79799e+07	3.11358e+07	1.80787e+07	3.32915e+07	4.62812e+07	1.80903e+07	2.17258e+07	3.14441e+07	3.49118e+07	3.23445e+07
	FALSE	(5ξ,9ξ)-17-Hydroxykaur-15-en-19-oic acid	C20 H30 O3	No match	Invalid mass	No results	No results	No match	144569	364.224	363.217	4.146	6.39102e+07	4	3	0	84.5	9.2	56.2				Reference-7793	No matches found	No matches found	DDA for preferred ion	[M-H]-1	3.16133e+07	2.60252e+07	2.65187e+07	2.66473e+07	2.73259e+07	2.7128e+07	4.81551e+07	4.01875e+07	3.95889e+07	6.39102e+07	2.88246e+07	4.5851e+07	3.86136e+07	3.99953e+07	3.3306e+07	2.00788e+07	3.51631e+07	3.49579e+07	3.11442e+07	4.1911e+07	2.64632e+07	4.77539e+07
	FALSE	Vanillin	C8 H8 O3	Full match	Full match	No results	Not the top hit	Full match	-1.58	152.047	151.04	1.053	6.38852e+07	32	11	0	86.7	9.3			Endogenous Metabolites; Excipients/Additives/Colorants; Personal Care Products/Cosmetics; Industrial Chemicals	D00091	Reference-2529	No matches found	No matches found	DDA for preferred ion	[M-H]-1	3.38306e+07	3.92494e+07	4.32605e+07	3.33116e+07	3.92835e+07	1.92296e+07	2.52631e+07	2.98119e+07	1.59022e+07	1.25539e+07	1.04658e+07	9.54227e+06	6.38852e+07	1.82827e+07	1.71194e+07	1.5041e+07	1.66441e+07	1.58028e+07	1.48373e+07	6.21862e+07	1.33606e+07	2.4339e+07
	FALSE	6α-Prostaglandin I1	C20 H34 O5	Not the top hit	Full match	No results	No results	Partial match	-1.49	354.24	353.233	4.898	6.29749e+07	24	18	0	82.1	9.1			Endogenous Metabolites		Autoprocessed-8501	No matches found	No matches found	DDA for preferred ion	[M-H]-1	2.62313e+07	2.91057e+07	2.01458e+07	2.72658e+07	1.96851e+07	2.13246e+07	1.73976e+07	3.13102e+07	2.47084e+07	2.26124e+07	2.62897e+07	2.68454e+07	2.03678e+07	2.80262e+07	2.6871e+07	3.40712e+07	4.15724e+07	2.90074e+07	3.09039e+07	1.98115e+07	2.11198e+07	6.29749e+07
	FALSE	4-Indolecarbaldehyde	C9 H7 N O	No match	Full match	No results	No results	Partial match	-2.58	145.052	190.051	4.146	6.22094e+07	8	1	0	90.1	9.5					Reference-1723	No matches found	No matches found	DDA for preferred ion	[M+FA-H]-1	3.90999e+07	3.77319e+07	2.60202e+07	4.06756e+07	3.73998e+07	2.86416e+07	3.9397e+07	3.7712e+07	6.88251e+06	3.09399e+07	3.37189e+07	2.65229e+07	4.24554e+07	4.89638e+07	5.65797e+07	4.84729e+07	2.49291e+07	5.40969e+07	3.91344e+07	6.22094e+07	3.95514e+07	3.22447e+07
	FALSE	Hexadecanedioic acid	C16 H30 O4	Full match	Full match	No results	No results	Full match	-1.99	286.214	285.207	1.664	6.11507e+07	3	2	0	82.5	9.1			Endogenous Metabolites; Natural Products/Medicines		Autoprocessed-5629	No matches found	No matches found	DDA for preferred ion	[M-H]-1	3.848e+07	3.12052e+07	2.30727e+07	4.31348e+07	3.96992e+07	3.41891e+07	2.4245e+07	2.60407e+07	3.53122e+07	2.56855e+07	3.31838e+07	2.34285e+07	5.23266e+07	4.38573e+07	3.73051e+07	4.84331e+07	2.03492e+07	4.21289e+07	3.32728e+07	4.11635e+07	2.68186e+07	4.428e+07
	FALSE	Linoleic Acid	C18 H32 O2	No match	Invalid mass	No results	No results	No match	64266	298.25	297.243	2.435	6.0814e+07	8	4	0	99.1	10			Endogenous Metabolites		Autoprocessed-8545	No matches found	No matches found	DDA for other ion	[M-H]-1	1.56591e+07	2.01638e+07	1.54256e+07	2.58317e+07	1.2644e+07	1.46177e+07	2.16463e+07	2.1728e+07	1.59615e+07	1.7103e+07	2.36792e+07	1.64527e+07	2.35425e+07	2.11536e+07	1.12543e+07	2.92318e+07	1.38213e+07	1.1568e+07	1.03277e+07	1.18397e+07	1.26168e+07	1.56009e+07
	FALSE	?17-6-keto Prostaglandin F1?	C20 H32 O6	No match	Invalid mass	No results	No results	No match	-48914.4	350.209	349.201	5.986	6.01435e+07	19	11	0	83.8	49.6			Endogenous Metabolites		Autoprocessed-8447	No matches found	No matches found	DDA for preferred ion	[M-H]-1	5.56999e+07	4.38675e+07	5.97358e+07	4.44619e+07	3.72528e+07	3.99413e+07	3.04416e+07	3.825e+07	4.30404e+07	3.31808e+07	3.91282e+07	3.94339e+07	4.95768e+07	3.2774e+07	2.58462e+07	3.89829e+07	6.01435e+07	3.50744e+07	3.64416e+07	2.21403e+07	3.82414e+07	4.41112e+07
	FALSE	3-Hydroxypyridine	C5 H5 N O	Full match	Full match	No results	No results	Partial match	-2.47	95.0369	94.0296	3.448	5.83621e+07	3	1	0	82.9	9.1			Pesticides/Herbicides		Reference-3323	No matches found	No matches found	DDA for preferred ion	[M-H]-1	8.25942e+06	2.14044e+07	1.01718e+07	6.78764e+06	4.69856e+06	1.66545e+07	1.48318e+07	1.31464e+07	8.79476e+06	2.09109e+07	2.5457e+07	2.18438e+07	1.63828e+07	1.38508e+07	3.71727e+07	1.84015e+07	8.36792e+06	1.94628e+07	1.30638e+07	5.83621e+07	1.91356e+07	5.84696e+06
	FALSE	Acrylic acid	C3 H4 O2	No results	Full match	No results	Not the top hit	Partial match	-4.02	72.0208	71.0136	3.345	5.72763e+07	4	1	0	98.9	9.9			Extractables/Leachables; Textile Chemicals/Auxiliary/Dyes; Personal Care Products/Cosmetics; Industrial Chemicals; Endogenous Metabolites; Excipients/Additives/Colorants	C00511	Reference-2696	No matches found	No matches found	DDA for preferred ion	[M-H]-1	8.44902e+06	1.51818e+07	1.35922e+07	1.52755e+07	3.95248e+07	3.79226e+07	4.63205e+07	1.6023e+07	2.74072e+07	1.17874e+07	1.54118e+07	2.72301e+07	1.1937e+07	2.83557e+07	2.28723e+07	1.74625e+07	3.46513e+07	2.09118e+07	3.69121e+07	5.72763e+07	3.22572e+07	9.64357e+06
	FALSE	3,5-Dimethoxybenzoic acid	C9 H10 O4	Full match	Full match	No results	Partial match	Not the top hit	-1.67	182.058	181.05	5.803	5.68479e+07	31	2	0	80.8	48.8			Endogenous Metabolites		Reference-3305	No matches found	No matches found	DDA for preferred ion	[M-H]-1	2.20583e+07	9.80867e+06	1.02506e+07	2.07771e+07	1.22256e+07	1.2099e+07	4.35108e+07	1.19373e+07	8.59864e+06	3.50762e+07	1.07573e+07	5.68453e+06	1.65195e+07	2.39978e+07	4.02007e+07	1.61839e+07	1.80715e+07	5.68479e+07	1.22989e+07	1.74562e+07	7.68739e+06	1.41609e+07
	FALSE	Dodecyl sulfate	C12 H26 O4 S	No match	Invalid mass	No results	No results	No match	-14.93	266.151	265.144	1.04	5.66261e+07	22	5	0	87.9	9.4			Personal Care Products/Cosmetics	C08031	Reference-1348	No matches found	No matches found	DDA for preferred ion	[M-H]-1	5.66261e+07	4.25915e+07	2.32799e+07	2.82873e+07	2.24787e+07	2.1296e+07	2.4409e+07	4.91684e+07	2.80547e+07	2.12421e+07	1.86445e+07	2.32561e+07	4.02091e+07	3.63772e+07	2.67594e+07	2.5222e+07	2.79577e+07	4.31264e+07	2.06335e+07	1.6935e+07	2.05031e+07	3.54481e+07
	FALSE	4-benzyl 2-ethyl 3-(2-ethoxy-2-oxoethyl)-5-methyl-1H-pyrrole-2,4-dicarboxylate	C20 H23 N O6	No match	Invalid mass	No results	No results	No results	6.67	373.155	372.148	1.693	5.60803e+07	0	3	0	80.6	48.7					Autoprocessed-247	No matches found	No matches found	DDA for preferred ion	[M-H]-1	5.60803e+07	1.59129e+07	2.75663e+07	3.44372e+07	1.78584e+07	2.87327e+07	3.17187e+07	3.14332e+07	2.6864e+07	3.53541e+07	1.85151e+07	2.66144e+07	1.06719e+07	3.21833e+07	3.76048e+07	1.18375e+07	3.25988e+07	1.42994e+07	2.76925e+07	1.51466e+07	1.7689e+07	3.57899e+07
	FALSE	Pipecolic acid	C6 H11 N O2	No match	Invalid mass	No results	No match	No match	139529	147.089	128.071	9.902	5.57241e+07	8	1	0	88.6	9.4			Endogenous Metabolites	C00408	Reference-548	No matches found	No matches found	DDA for other ion	[M-H-H2O]-1	1.18722e+07	3.30376e+07	7.08168e+06	8.79227e+06	9.64368e+06	1.26498e+07	6.50192e+06	9.18946e+06	2.16798e+07	2.62932e+07	1.02969e+07	3.18581e+07	3.21908e+07	1.89801e+07	1.82934e+07	5.57241e+07	1.0824e+07	2.39705e+07	7.53271e+06	2.89809e+07	7.9603e+06	9.79983e+06
	FALSE	Pipecolic acid	C6 H11 N O2	Full match	Full match	No results	Full match	Not the top hit	-1.78	129.079	128.071	9.901	5.57241e+07	17	1	0	88.6	9.4			Endogenous Metabolites	C00408	Reference-548	No matches found	No matches found	DDA for preferred ion	[M-H]-1	1.18722e+07	3.30376e+07	7.08168e+06	8.79227e+06	9.64368e+06	1.26498e+07	6.50192e+06	9.18946e+06	2.16798e+07	2.62932e+07	1.02969e+07	3.18581e+07	3.21908e+07	1.89801e+07	1.82934e+07	5.57241e+07	1.0824e+07	2.39705e+07	7.53271e+06	2.89809e+07	7.9603e+06	9.79983e+06
	FALSE	?-Muricholic Acid	C24 H40 O5	Full match	Full match	No results	No results	Not the top hit	-1.54	408.287	407.28	8.665	5.55101e+07	20	5	0	98	9.9			Endogenous Metabolites		Autoprocessed-8518	No matches found	No matches found	DDA for preferred ion	[M-H]-1	1.75114e+06	3.06107e+06	576499	3.93532e+06	414468	694334	585004	2.7876e+06	3.30772e+06	1.47407e+06	3.84136e+06	5.25659e+06	3.06707e+06	3.33945e+06	5.03366e+06	5.23792e+06	1.74888e+06	2.87873e+06	4.75473e+06	3.22583e+06	2.6196e+06	1.62908e+06
	FALSE	4-Indolecarbaldehyde	C9 H7 N O	Full match	Full match	No results	No results	Partial match	-2.31	145.052	144.045	1.148	5.52209e+07	8	1	0	99.5	10					Reference-1723	No matches found	No matches found	DDA for preferred ion	[M-H]-1	2.2737e+07	3.00561e+07	1.66106e+07	2.18371e+07	2.15893e+07	2.84032e+07	2.01096e+07	2.89252e+07	2.18774e+07	2.21219e+07	2.16966e+07	4.13169e+07	2.41492e+07	3.52897e+07	2.66476e+07	5.52209e+07	3.05667e+07	2.97486e+07	2.28846e+07	3.75064e+07	2.70667e+07	3.65193e+07
	FALSE	Asiatic acid	C30 H48 O5	Not the top hit	Full match	No results	No results	Partial match	-1.92	488.349	487.342	1.969	5.50575e+07	10	3	0	94.2	9.7			Endogenous Metabolites; Natural Products/Medicines		Autoprocessed-5738	No matches found	No matches found	DDA for preferred ion	[M-H]-1	5.0446e+07	3.51479e+07	2.83782e+07	5.11638e+07	5.25073e+07	4.51464e+07	2.74533e+07	5.50575e+07	4.63812e+07	2.96127e+07	4.8875e+07	4.42177e+07	4.62986e+07	4.32988e+07	3.50377e+07	3.72655e+07	2.3869e+07	3.24035e+07	3.64039e+07	1.84499e+07	2.32044e+07	4.21492e+07
	FALSE	Dodecyl sulfate	C12 H26 O4 S	No match	Invalid mass	No results	No results	No match	-14.61	266.151	265.144	1.401	5.47629e+07	22	5	0	93.2	9.7			Personal Care Products/Cosmetics	C08031	Reference-1348	No matches found	No matches found	DDA for preferred ion	[M-H]-1	4.3993e+07	2.96123e+07	2.48574e+07	3.40177e+07	2.51951e+07	2.05468e+07	2.75947e+07	3.03201e+07	3.40288e+07	4.13605e+07	4.62806e+07	3.33447e+07	3.23029e+07	4.42815e+07	3.69217e+07	5.47629e+07	2.93538e+07	2.93783e+07	3.29886e+07	4.84303e+07	4.53042e+07	1.47978e+07
	FALSE	Tridecylic acid	C13 H26 O2	Full match	Full match	No results	No results	Not the top hit	-1.86	214.193	213.186	1.219	5.37218e+07	13	1	0	84.5	9.2			Endogenous Metabolites	C17076	Reference-1500	No matches found	No matches found	DDA for preferred ion	[M-H]-1	2.14194e+07	5.37218e+07	2.01736e+07	2.60669e+07	3.12621e+07	2.00967e+07	2.33456e+07	2.42427e+07	2.70616e+07	2.13815e+07	4.80251e+07	3.54873e+07	3.52392e+07	2.52552e+07	1.83435e+07	3.74623e+07	1.72049e+07	2.75808e+07	2.37699e+07	3.16202e+07	3.95612e+07	4.33403e+07
	FALSE	2,3-Dihydro-1-benzofuran-2-carboxylic acid	C9 H8 O3	No match	Invalid mass	No results	No match	No match	109786	182.058	181.05	3.072	5.34123e+07	31	2	0	88.1	9.4					Reference-5582	No matches found	No matches found	DDA for other ion	[M-H]-1	3.11842e+07	2.91872e+07	2.60575e+07	4.05469e+07	2.82785e+07	2.69549e+07	4.21377e+07	2.8411e+07	2.78061e+07	2.21275e+07	2.57125e+07	1.29311e+07	3.74876e+07	4.19277e+07	5.34123e+07	3.01658e+07	2.94473e+07	4.47527e+07	2.25572e+07	2.86685e+07	1.61291e+07	2.8013e+07
	FALSE	Isophthalic acid	C8 H6 O4	Full match	Full match	No results	Partial match	Partial match	-2.51	166.026	165.019	1.949	5.16962e+07	5	2	0	80.1	9			Extractables/Leachables; Industrial Chemicals; Textile Chemicals/Auxiliary/Dyes		Reference-3201	No matches found	No matches found	DDA for preferred ion	[M-H]-1	1.23932e+07	5.16962e+07	1.71018e+07	1.24587e+07	1.3129e+07	1.58749e+07	1.56498e+07	1.94868e+07	1.81379e+07	1.43232e+07	3.79674e+07	2.60552e+07	2.5553e+07	2.86532e+07	2.31895e+07	2.60261e+07	3.40931e+07	3.20247e+07	1.71782e+07	3.09862e+07	3.35231e+07	1.76894e+07
	FALSE	3-Methyl-4-[2-(4-morpholinophenyl)hydrazono]-1-phenyl-4,5-dihydro-1H-pyrazol-5-one	C20 H21 N5 O2	Not the top hit	Full match	No results	No results	No results	3.73	363.171	362.164	4.676	5.07687e+07	0	1	0	87.3	9.4					Reference-3584	No matches found	No matches found	DDA for preferred ion	[M-H]-1	3.32241e+07	8.64899e+06	6.87363e+06	702490	843289	3.53049e+06	1.45096e+07	1.63004e+07	1.70564e+06	3.64764e+07	1.06487e+07	3.57017e+06	652892	2.99036e+07	3.48903e+07	3.42819e+06	5.07687e+07	1.98034e+06	3.76286e+06	1.22748e+07	2.5922e+07	9.59332e+06
	FALSE	NP-008607	C28 H46 O7	No results	Invalid mass	No results	No results	No match	72757.7	530.29	529.283	5.631	4.98803e+07	2	1	0	90.7	52.7			Endogenous Metabolites; Natural Products/Medicines		Autoprocessed-7707	No matches found	No matches found	DDA for preferred ion	[M-H]-1	1.17485e+07	2.86629e+07	2.84934e+07	2.84293e+07	1.81767e+07	8.49767e+06	6.66602e+06	3.68396e+07	2.31731e+07	2.68528e+07	3.44308e+07	4.94321e+07	1.09742e+07	2.65026e+07	1.67703e+07	1.20856e+07	1.55252e+07	2.02592e+07	2.10011e+07	1.86131e+07	4.1312e+07	4.07875e+07
	FALSE	NP-008607	C28 H46 O7	No results	Invalid mass	No results	No results	No match	72757.8	530.29	529.283	5.52	4.98803e+07	2	1	0	89.7	51.3			Endogenous Metabolites; Natural Products/Medicines		Autoprocessed-7707	No matches found	No matches found	DDA for preferred ion	[M-H]-1	1.14825e+07	1.13736e+07	3.06839e+07	3.16617e+07	7.41036e+06	8.49767e+06	9.77396e+06	1.72115e+07	1.1696e+07	1.11529e+07	1.22317e+07	1.80169e+07	1.09742e+07	1.33168e+07	8.99968e+06	1.20856e+07	2.19683e+07	1.44318e+07	1.16933e+07	7.29858e+06	1.46372e+07	4.33109e+07
	FALSE	NP-008607	C28 H46 O7	No match	Invalid mass	No results	No results	No results	-463621	265.145	529.283	5.506	4.98803e+07	0	1	0	89.7	51.3			Endogenous Metabolites; Natural Products/Medicines		Autoprocessed-7707	No matches found	No matches found	DDA for other ion	[2M-H]-1	1.14825e+07	1.1742e+07	3.06839e+07	3.16617e+07	7.41036e+06	8.49767e+06	9.77396e+06	1.72115e+07	1.19094e+07	1.11529e+07	1.22317e+07	1.86147e+07	1.09742e+07	2.65026e+07	8.9427e+06	1.20856e+07	2.19683e+07	1.21695e+07	1.19733e+07	7.32997e+06	1.44802e+07	4.33109e+07
	FALSE	β-D-Glucopyranuronic acid	C6 H10 O7	Full match	Full match	No results	Not the top hit	Not the top hit	-1.85	194.042	193.035	10.366	4.98257e+07	12	2	0	89.9	51.3			Endogenous Metabolites	C08350	Reference-1214	No matches found	No matches found	DDA for preferred ion	[M-H]-1	3.91612e+06	1.94346e+07	7.45178e+06	5.92766e+06	6.00206e+06	6.66752e+06	8.0528e+06	8.64807e+06	3.41688e+06	6.92695e+06	2.19931e+07	9.0053e+06	7.74536e+06	1.90959e+07	2.01689e+07	3.4306e+07	1.13418e+07	1.33826e+07	9.29658e+06	4.98257e+07	1.70154e+07	5.73233e+06
	FALSE	Octyl gallate	C15 H22 O5	No match	Invalid mass	No results	No results	No match	-212732	222.125	267.123	2.433	4.78053e+07	14	4	0	90.4	9.5			Personal Care Products/Cosmetics; Excipients/Additives/Colorants		Reference-3154	No matches found	No matches found	DDA for other ion	[M+FA-H]-1	1.57289e+07	1.31332e+07	1.2422e+07	1.78797e+07	1.22613e+07	1.1926e+07	1.01849e+07	1.3359e+07	2.0458e+07	1.50021e+07	1.69812e+07	1.22859e+07	2.83342e+07	2.10987e+07	1.35679e+07	1.99395e+07	2.40476e+07	1.236e+07	1.41767e+07	2.35689e+07	1.02768e+07	1.24664e+07
	FALSE	(3β,5ξ,9ξ)-3,23-Dihydroxy-1-oxoolean-12-en-28-oic acid	C30 H46 O5	Not the top hit	Full match	No results	No results	Partial match	-2.07	486.334	485.326	1.687	4.72719e+07	8	2	0	94.5	9.7					Reference-7834	No matches found	No matches found	DDA for preferred ion	[M-H]-1	3.61907e+07	3.2719e+07	3.41128e+07	4.72719e+07	3.83901e+07	3.33443e+07	3.73946e+07	3.98443e+07	3.66739e+07	2.26225e+07	3.81486e+07	3.34305e+07	3.04489e+07	2.32228e+07	3.41435e+07	2.73275e+07	2.68157e+07	2.22792e+07	3.16595e+07	2.31531e+07	2.60338e+07	3.90445e+07
	FALSE	N-{[(2R,4S,5R)-5-(3-Cyclopentyl-1-methyl-1H-pyrazol-5-yl)-1-azabicyclo[2.2.2]oct-2-yl]methyl}-4-methoxybenzamide	C25 H34 N4 O2	No results	Full match	No results	No results	No match	-4.95	422.266	421.259	6.606	4.66682e+07	1	1	0	94.1	9.7					Reference-9074	No matches found	No matches found	DDA for preferred ion	[M-H]-1	2.47527e+07	1.7217e+07	1.79884e+07	2.01604e+07	1.82612e+07	1.43737e+07	1.29756e+07	2.36712e+07	2.18214e+07	2.98695e+07	2.25613e+07	2.83865e+07	2.47503e+07	2.12597e+07	1.92297e+07	2.39651e+07	2.62455e+07	1.23989e+07	1.93668e+07	1.35106e+07	2.17428e+07	4.66682e+07
	FALSE	4-Dodecylbenzenesulfonic acid	C18 H30 O3 S	No match	Invalid mass	No results	No results	No results	55213.4	344.202	389.2	0.789	4.44023e+07	0	3	0	99.7	10			Extractables/Leachables; Personal Care Products/Cosmetics; Industrial Chemicals		Reference-1484	No matches found	No matches found	DDA for other ion	[M+FA-H]-1	1.46429e+07	1.82012e+07	1.79143e+07	1.99334e+07	1.4135e+07	2.25246e+07	4.03921e+07	1.43185e+07	1.70911e+07	1.01197e+07	1.00333e+07	1.32506e+07	2.8404e+07	4.44023e+07	1.69895e+07	1.10875e+07	2.5259e+07	3.32478e+07	9.23339e+06	5.54923e+06	5.59182e+06	1.06223e+07
	FALSE	1,5-Isoquinolinediol	C9 H7 N O2	No results	Invalid mass	No results	No match	No match	111832	179.058	160.04	6.655	4.33525e+07	7	4	0	92.1	9.6	51		Therapeutics/Prescription Drugs		Reference-2549	No matches found	No matches found	DDA for other ion	[M-H-H2O]-1	3.55918e+07	3.80995e+07	2.88187e+07	2.89007e+07	2.67176e+07	2.24206e+07	2.33387e+07	2.41763e+07	3.09226e+07	2.58498e+07	2.61356e+07	2.96179e+07	4.15422e+07	4.33525e+07	2.78298e+07	3.8743e+07	3.96104e+07	3.74321e+07	2.6033e+07	2.53164e+07	3.75754e+07	2.07263e+07
	FALSE	1,5-Isoquinolinediol	C9 H7 N O2	No results	Full match	No results	Partial match	Partial match	-1.81	161.047	160.04	6.652	4.33525e+07	11	4	0	92.1	9.6	51		Therapeutics/Prescription Drugs		Reference-2549	No matches found	No matches found	DDA for preferred ion	[M-H]-1	3.55918e+07	3.80995e+07	2.88187e+07	2.89007e+07	2.67176e+07	2.24206e+07	2.4091e+07	2.41763e+07	3.09226e+07	2.58498e+07	2.61356e+07	2.96179e+07	4.15422e+07	4.33525e+07	2.8772e+07	3.8743e+07	3.96104e+07	3.74321e+07	2.6033e+07	2.61199e+07	3.75754e+07	2.07263e+07
	FALSE	Indole-2-carboxylic acid	C9 H7 N O2	No match	Invalid mass	No results	No match	No match	111832	179.058	178.051	1.621	4.32089e+07	7	5	0	98.6	9.9	61.3		Endogenous Metabolites		Reference-1302	No matches found	No matches found	DDA for other ion	[M-H]-1	1.56514e+07	1.39537e+07	1.82854e+07	7.95067e+06	1.86176e+07	5.82468e+06	3.43222e+07	1.85981e+07	1.02729e+07	2.58946e+07	1.0527e+07	8.86123e+06	2.78136e+07	3.68381e+07	3.54093e+07	3.22485e+07	2.76225e+07	3.66194e+07	2.8334e+07	4.32089e+07	1.35597e+07	2.35923e+07
	FALSE	N-{[(2R,4S,5R)-5-(3-Cyclopentyl-1-methyl-1H-pyrazol-5-yl)-1-azabicyclo[2.2.2]oct-2-yl]methyl}-4-methoxybenzamide	C25 H34 N4 O2	Not the top hit	Full match	No results	No results	No match	-4.72	422.266	421.259	5.331	4.28406e+07	1	1	0	86.6	9.3					Reference-9074	No matches found	No matches found	DDA for preferred ion	[M-H]-1	1.83602e+07	1.75587e+07	1.44115e+07	1.67807e+07	1.60468e+07	1.22408e+07	1.14332e+07	1.60419e+07	1.50791e+07	3.16026e+07	1.93688e+07	2.08499e+07	1.52555e+07	1.42081e+07	1.03148e+07	1.70644e+07	2.29359e+07	1.28015e+07	1.80072e+07	2.10875e+07	1.89334e+07	4.28406e+07
	FALSE	N-{[(2R,4S,5R)-5-(3-Cyclopentyl-1-methyl-1H-pyrazol-5-yl)-1-azabicyclo[2.2.2]oct-2-yl]methyl}-4-methoxybenzamide	C25 H34 N4 O2	No results	Invalid mass	No results	No results	No results	-571073	181.122	421.259	5.309	4.28406e+07	0	1	0	86.6	9.3					Reference-9074	No matches found	No matches found	DDA for other ion	[2M-H+HAc]-1	1.83602e+07	1.75587e+07	1.44115e+07	1.67807e+07	1.60468e+07	1.22408e+07	1.14332e+07	1.60419e+07	1.50791e+07	3.16026e+07	1.93688e+07	2.08499e+07	1.52555e+07	1.42081e+07	1.03148e+07	1.70644e+07	1.86997e+07	1.28015e+07	1.80072e+07	2.10875e+07	1.89334e+07	4.28406e+07
	FALSE	D(+)-Phenyllactic acid	C9 H10 O3	Full match	Full match	No results	Partial match	Partial match	-2.28	166.063	165.055	1.575	4.26217e+07	43	3	0	94.5	82.8			Endogenous Metabolites	C05607	Reference-3080	No matches found	No matches found	DDA for preferred ion	[M-H]-1	4.14352e+07	2.34533e+07	2.61433e+07	3.61602e+07	2.43949e+07	3.18108e+07	2.75177e+07	2.65738e+07	3.1453e+07	2.88733e+07	2.85698e+07	2.15105e+07	4.04107e+07	4.26217e+07	1.11273e+07	2.73895e+07	2.16214e+07	3.93577e+07	2.94021e+07	3.34672e+07	2.74126e+07	3.45871e+07
	FALSE	Dodecyl sulfate	C12 H26 O4 S	No match	Invalid mass	No results	No results	No match	-14.73	266.151	265.144	1.105	4.25915e+07	22	5	0	87.9	9.4			Personal Care Products/Cosmetics	C08031	Reference-1348	No matches found	No matches found	DDA for preferred ion	[M-H]-1	3.26959e+07	4.25915e+07	1.57674e+07	2.68876e+07	2.08527e+07	1.31763e+07	2.06105e+07	2.58264e+07	1.93264e+07	3.08397e+07	3.38615e+07	2.11511e+07	2.42555e+07	3.22845e+07	3.31896e+07	2.81695e+07	1.75489e+07	2.1977e+07	2.88719e+07	3.71112e+07	3.1758e+07	1.17224e+07
	FALSE	Phenol	C6 H6 O	Full match	Full match	No results	Full match	Full match	-3.06	94.0416	93.0343	4.784	4.21284e+07	1	1	0	86.8	9.3			Industrial Chemicals; Excipients/Additives/Colorants; Therapeutics/Prescription Drugs; Personal Care Products/Cosmetics; Endogenous Metabolites; Pesticides/Herbicides; Extractables/Leachables; Textile Chemicals/Auxiliary/Dyes; Natural Products/Medicines	C00146	Reference-3052	No matches found	No matches found	DDA for preferred ion	[M-H]-1	2.67534e+07	2.55673e+07	2.61899e+07	2.71612e+07	1.86983e+07	1.32463e+07	1.07129e+07	1.45735e+07	2.17433e+07	1.44586e+07	2.4932e+07	8.3452e+06	2.8605e+07	3.71628e+07	2.9541e+07	4.21284e+07	1.97157e+07	1.4866e+07	1.4288e+07	1.79401e+07	1.68136e+07	2.16568e+07
	FALSE	?-Muricholic Acid	C24 H40 O5	Full match	Full match	No results	No results	Not the top hit	-1.75	408.287	407.28	8.606	4.19632e+07	20	5	0	98	9.9			Endogenous Metabolites		Autoprocessed-8518	No matches found	No matches found	DDA for preferred ion	[M-H]-1	2.36788e+06	3.06107e+06	566140	3.32743e+06	535764	1.54022e+06	721136	2.7876e+06	4.03176e+06	1.76995e+06	2.80343e+06	3.97203e+06	2.98069e+06	3.32355e+06	3.88168e+06	5.5478e+06	5.58763e+06	1.3211e+06	4.18697e+06	3.04458e+06	4.01309e+06	1.98562e+06
	FALSE	(5ξ,9ξ)-17-Hydroxykaur-15-en-19-oic acid	C20 H30 O3	No match	Invalid mass	No results	No results	No match	144570	364.224	363.217	4.676	3.99231e+07	4	2	0	82.5	9.1	54.3				Reference-7793	No matches found	No matches found	DDA for preferred ion	[M-H]-1	2.63527e+07	1.43508e+07	1.26859e+07	1.56124e+07	1.84421e+07	1.83871e+07	2.8242e+07	1.79338e+07	2.5075e+07	3.56354e+07	2.55812e+07	2.09397e+07	2.21959e+07	3.4236e+07	2.42025e+07	1.52666e+07	2.02889e+07	1.44407e+07	1.84266e+07	3.03341e+07	2.30609e+07	3.28478e+07
	FALSE	Xanthurenic acid	C10 H7 N O4	Full match	Full match	No results	Full match	Full match	-2.09	205.037	204.03	8.217	3.86617e+07	3	3	0	97.4	65.2	50.2		Endogenous Metabolites	C02470	Reference-789	No matches found	No matches found	DDA for preferred ion	[M-H]-1	1.7152e+07	1.90009e+07	1.68718e+07	2.06349e+07	1.44253e+07	1.58984e+07	1.59424e+07	1.72447e+07	1.87781e+07	1.0929e+07	1.71343e+07	1.45885e+07	2.31662e+07	2.87745e+07	1.75329e+07	2.10605e+07	3.86617e+07	2.52119e+07	1.52675e+07	1.4947e+07	1.77905e+07	1.47098e+07
	FALSE	(16R,17S)-8-(4-Morpholinyl)-17-[2-(4-morpholinyl)-2-oxoethyl]-12-oxa-1,4-diazatricyclo[14.3.1.06,11]icosa-6,8,10-trien-2-one	C27 H40 N4 O5	Unused	Invalid mass	No results	No results	No results	107917	554.291	553.283	0.986	3.83958e+07	0	1	0	91.4	9.6					Reference-10070	No matches found	No matches found	DDA for other ion	[M-H]-1	3.83958e+07	1.68515e+07	2.69572e+07	3.44685e+07	2.19011e+07	2.0102e+07	2.42658e+07	2.78176e+07	3.39439e+07	1.96387e+07	1.95901e+07	2.56754e+07	2.21618e+07	2.50881e+07	2.27694e+07	2.38243e+07	2.41669e+07	2.22147e+07	2.39693e+07	1.48822e+07	2.46939e+07	3.73426e+07
	FALSE	N-{[(2R,4S,5R)-5-(3-Cyclopentyl-1-methyl-1H-pyrazol-5-yl)-1-azabicyclo[2.2.2]oct-2-yl]methyl}-4-methoxybenzamide	C25 H34 N4 O2	No match	Full match	No results	No results	No match	-4.97	422.266	421.259	7.574	3.82935e+07	1	1	0	92.2	9.6					Reference-9074	No matches found	No matches found	DDA for preferred ion	[M-H]-1	2.23784e+07	1.49262e+07	1.70988e+07	2.46534e+07	1.70329e+07	1.6e+07	1.71829e+07	2.40109e+07	2.19183e+07	1.68216e+07	1.93676e+07	2.39263e+07	1.76722e+07	2.13255e+07	1.44167e+07	2.33104e+07	2.7639e+07	1.94609e+07	1.77787e+07	1.64708e+07	2.8049e+07	3.82935e+07
	FALSE	?-Muricholic Acid	C24 H40 O5	Not the top hit	Full match	No results	No results	Not the top hit	-2.56	408.287	407.279	11.601	3.81853e+07	20	5	0	98.5	9.9			Endogenous Metabolites		Autoprocessed-8518	No matches found	No matches found	DDA for preferred ion	[M-H]-1	1.94578e+06	873285	473854	682770	3.2046e+06	758550	871929	773115	1.80947e+06	105472	3.34979e+06	725848	345252	360267	383886	4.12638e+06	149900	612949	715136	1.16166e+06	91194.9	2.21154e+06
	FALSE	Ostruthin	C19 H22 O3	No match	Invalid mass	No results	No results	No results	9.24	298.16	297.152	0.791	3.7619e+07	0	3	0	94.3	9.7				C09281	Reference-7507	No matches found	No matches found	DDA for preferred ion	[M-H]-1	2.67595e+07	2.05775e+07	2.02882e+07	2.97918e+07	3.04301e+07	3.7619e+07	2.59046e+07	3.17356e+07	2.21449e+07	2.08077e+07	2.79443e+07	2.89772e+07	3.28299e+07	2.3238e+07	1.67797e+07	2.77278e+07	2.4168e+07	3.02558e+07	1.69579e+07	1.93848e+07	1.71498e+07	2.37544e+07
	FALSE	D-(-)-Fructose	C6 H12 O6	Full match	Full match	No results	Not the top hit	Not the top hit	-1.75	180.063	179.056	10.736	3.72044e+07	82	15	0	87.1	50.5	73.9		Endogenous Metabolites	C02336	Reference-1478	No matches found	No matches found	DDA for preferred ion	[M-H]-1	2.13725e+07	3.72044e+07	5.16216e+06	1.13425e+07	1.05019e+07	2.30716e+07	1.284e+07	1.78337e+07	1.48815e+07	1.38727e+07	2.76816e+07	1.88529e+07	2.59917e+07	1.99476e+07	1.89698e+07	3.11207e+07	1.69591e+07	2.11608e+07	1.78173e+07	2.97189e+07	2.5382e+07	1.21433e+07
	FALSE	1,5-Isoquinolinediol	C9 H7 N O2	No match	Invalid mass	No results	No match	No match	111831	179.058	178.051	1.397	3.68381e+07	7	6	0	91.4	9.6	56.9		Therapeutics/Prescription Drugs		Reference-2549	No matches found	No matches found	DDA for other ion	[M-H]-1	8.69133e+06	1.07116e+07	2.92617e+07	1.7503e+07	2.41704e+07	2.04903e+07	3.45019e+07	3.30872e+07	1.51402e+07	2.67033e+07	9.44276e+06	1.61597e+07	1.73544e+07	3.68381e+07	3.54093e+07	1.99137e+07	2.76225e+07	3.66194e+07	2.8334e+07	2.0459e+07	1.35597e+07	2.35923e+07
	FALSE	11-Deoxy prostaglandin F2β	C20 H34 O4	No match	Invalid mass	No results	No results	No match	64993.5	360.229	359.222	1.392	3.6815e+07	5	5	0	86	9.3			Endogenous Metabolites		Reference-4600	No matches found	No matches found	DDA for preferred ion	[M-H]-1	2.69979e+07	3.15657e+07	2.36251e+07	2.46733e+07	2.28579e+07	2.22175e+07	1.83511e+07	2.65785e+07	3.01583e+07	2.23897e+07	3.049e+07	3.6815e+07	2.18044e+07	1.8775e+07	1.92104e+07	2.89528e+07	2.78176e+07	2.24003e+07	1.92637e+07	1.58269e+07	3.03905e+07	1.96449e+07
	FALSE	β-Muricholic acid	C24 H40 O5	Full match	Full match	No results	No results	Not the top hit	-1.53	408.287	407.28	11.497	3.65708e+07	20	5	0	97	9.9			Endogenous Metabolites		Autoprocessed-8518	No matches found	No matches found	DDA for preferred ion	[M-H]-1	6.82876e+06	1.14721e+06	162203	287860	3.29069e+06	1.4542e+06	418458	479239	1.60125e+06	127526	196082	420829	232414	180005	125516	4.12638e+06	149900	555452	214970	404270	91194.9	891676
	FALSE	N-Ethylglycine	C4 H9 N O2	Full match	Full match	No results	Partial match	Not the top hit	-2.24	103.063	102.056	10.784	3.63347e+07	17	3	0	98.5	9.9				C11735	Reference-1789	No matches found	No matches found	DDA for preferred ion	[M-H]-1	5.93013e+06	2.09158e+07	4.40721e+06	5.28618e+06	6.741e+06	4.44945e+06	5.88912e+06	5.57869e+06	6.11041e+06	1.03689e+07	2.0837e+07	1.42632e+07	1.40198e+07	6.52001e+06	1.3678e+07	3.63347e+07	5.62246e+06	7.30239e+06	6.7452e+06	1.70028e+07	5.9403e+06	5.24225e+06
	FALSE	β-Muricholic acid	C24 H40 O5	Full match	Full match	No results	No results	Not the top hit	-1.94	408.287	407.28	8.328	3.62879e+07	20	5	0	99.4	10			Endogenous Metabolites		Autoprocessed-8518	No matches found	No matches found	DDA for preferred ion	[M-H]-1	5.50923e+06	5.08851e+06	2.47754e+06	4.09607e+06	1.98422e+06	1.24593e+06	3.99968e+06	1.63178e+06	3.15246e+06	8.50403e+06	3.84967e+06	1.73157e+06	1.98321e+06	1.04107e+07	2.01656e+06	1.34316e+07	1.00926e+07	4.91262e+06	1.66872e+06	4.21438e+06	4.8924e+06	5.41274e+06
	FALSE	NP-011548	C18 H34 O3	Full match	Full match	No results	No results	Partial match	-1.86	298.25	297.243	11.216	3.54105e+07	8	1	0	93.2	9.7			Endogenous Metabolites; Natural Products/Medicines		Autoprocessed-6496	No matches found	No matches found	DDA for preferred ion	[M-H]-1	3.39199e+06	1.98829e+06	4.78647e+06	8.66953e+06	9.72277e+06	2.77988e+06	4.1453e+06	6.09623e+06	3.54105e+07	3.50058e+06	2.748e+06	2.74893e+06	2.73782e+06	2.46135e+06	2.27131e+06	7.66402e+06	2.35262e+06	2.15602e+06	2.12789e+06	2.35488e+06	2.21371e+06	2.66526e+06
	FALSE	?17-6-keto Prostaglandin F1?	C20 H32 O6	Unused	Invalid mass	No results	No results	No match	-48914.3	350.209	349.201	5.385	3.42145e+07	19	13	0	87.5	50.7			Endogenous Metabolites		Autoprocessed-8447	No matches found	No matches found	DDA for preferred ion	[M-H]-1	1.89919e+07	2.76995e+07	3.42053e+07	1.88345e+07	1.92737e+07	2.10581e+07	2.16281e+07	2.61712e+07	2.25907e+07	2.28869e+07	2.9401e+07	1.97471e+07	2.9648e+07	2.3902e+07	2.30916e+07	2.18467e+07	3.42145e+07	1.95459e+07	2.19299e+07	1.50872e+07	1.69686e+07	2.46078e+07
	FALSE	Benzoic acid	C7 H6 O2	No match	Invalid mass	No results	No results	No match	147581	140.047	139.04	1.581	3.39098e+07	13	2	0	99.6	10			Industrial Chemicals; Excipients/Additives/Colorants; Endogenous Metabolites	C00180	Reference-332	No matches found	No matches found	DDA for other ion	[M-H]-1	9.78939e+06	1.72766e+07	2.23192e+07	2.04571e+07	2.15484e+07	2.02024e+07	1.874e+07	2.06429e+07	2.32614e+07	1.41671e+07	1.50484e+07	2.27048e+07	2.43642e+07	3.39098e+07	2.66023e+07	2.80078e+07	2.7918e+07	2.2439e+07	1.97293e+07	2.54206e+07	2.74358e+07	3.23844e+07
	FALSE	(16R,17S)-8-(4-Morpholinyl)-17-[2-(4-morpholinyl)-2-oxoethyl]-12-oxa-1,4-diazatricyclo[14.3.1.06,11]icosa-6,8,10-trien-2-one	C27 H40 N4 O5	No match	Invalid mass	No results	No results	No results	71916.4	536.28	535.272	0.966	3.34299e+07	0	1	0	91.4	9.6					Reference-10070	No matches found	No matches found	DDA for preferred ion	[M-H]-1	2.11346e+07	1.97653e+07	2.24875e+07	1.62095e+07	1.8964e+07	9.32955e+06	5.72786e+06	2.74197e+07	2.08929e+07	2.57377e+07	7.46231e+06	9.92782e+06	9.75659e+06	2.13611e+07	7.15552e+06	9.99153e+06	1.50916e+07	4.67748e+06	1.49011e+07	1.73819e+07	6.93216e+06	1.52849e+07
	FALSE	6-Benzyl-2-(tert-butyl)-6,7-dihydro-4H-pyrazolo[1,5-a]pyrrolo[3,4-d]pyrimidine-5,8-dione	C19 H20 N4 O2	Not the top hit	Full match	No results	No results	Partial match	4.46	336.16	335.153	5.315	3.3165e+07	1	2	0	87.2	9.4					Reference-4490	No matches found	No matches found	DDA for preferred ion	[M-H]-1	2.34539e+07	1.50254e+07	1.95326e+07	2.32205e+07	1.80761e+07	1.50246e+07	1.46715e+07	2.29259e+07	2.35126e+07	1.97533e+07	2.22024e+07	2.89854e+07	1.92561e+07	2.11162e+07	1.13363e+07	2.04169e+07	2.24958e+07	1.89883e+07	1.90588e+07	1.14909e+07	2.00126e+07	2.77993e+07
	FALSE	(16R,17S)-8-(4-Morpholinyl)-17-[2-(4-morpholinyl)-2-oxoethyl]-12-oxa-1,4-diazatricyclo[14.3.1.06,11]icosa-6,8,10-trien-2-one	C27 H40 N4 O5	No match	Invalid mass	No results	No results	No results	71916.3	536.28	535.272	1.069	3.30263e+07	0	1	0	91.4	9.6					Reference-10070	No matches found	No matches found	DDA for preferred ion	[M-H]-1	3.20371e+07	9.64178e+06	3.30263e+07	2.04666e+07	1.8964e+07	1.7481e+07	1.15258e+07	2.74197e+07	2.65933e+07	2.62637e+07	9.62786e+06	1.42791e+07	9.71837e+06	5.54047e+06	8.14322e+06	2.74669e+06	1.50916e+07	5.96933e+06	1.32139e+07	1.15071e+07	1.43623e+07	1.94692e+07
	FALSE	(16R,17S)-8-(4-Morpholinyl)-17-[2-(4-morpholinyl)-2-oxoethyl]-12-oxa-1,4-diazatricyclo[14.3.1.06,11]icosa-6,8,10-trien-2-one	C27 H40 N4 O5	No match	Invalid mass	No results	No results	No results	107916	554.29	535.272	1.068	3.30263e+07	0	1	0	91.4	9.6					Reference-10070	No matches found	No matches found	DDA for other ion	[M-H-H2O]-1	3.20371e+07	9.64178e+06	3.30263e+07	2.04666e+07	1.8964e+07	1.7481e+07	1.15258e+07	2.74197e+07	2.65933e+07	2.62637e+07	9.62786e+06	1.42791e+07	9.75659e+06	5.54047e+06	8.14322e+06	2.74669e+06	1.50916e+07	5.96933e+06	1.32139e+07	1.15071e+07	1.43623e+07	1.94692e+07
	FALSE	2-({[4-(6-methyl-1,3-benzothiazol-2-yl)phenyl]imino}methyl)phenol	C21 H16 N2 O S	No match	Invalid mass	No results	No results	No results	-17.26	344.092	343.085	1.568	3.18857e+07	0	1	0	81.1	9.1					Autoprocessed-636	No matches found	No matches found	DDA for preferred ion	[M-H]-1	7.69648e+06	3.18857e+07	9.85497e+06	2.12853e+07	1.89719e+07	1.91769e+07	9.75857e+06	1.84097e+07	2.72451e+07	1.24446e+07	2.96881e+07	3.03501e+07	2.41456e+07	2.37077e+07	1.69776e+07	2.57393e+07	1.28174e+07	1.18697e+07	5.86693e+06	1.92803e+07	1.3377e+07	7.6674e+06
	FALSE	Crotonic acid	C4 H6 O2	No match	Invalid mass	No results	No results	No match	209333	104.047	103.04	7.358	3.14673e+07	13	2	0	91	9.6			Extractables/Leachables; Excipients/Additives/Colorants; Industrial Chemicals; Endogenous Metabolites	C01771	Reference-2732	No matches found	No matches found	DDA for other ion	[M-H]-1	9.3676e+06	1.47942e+07	7.92013e+06	9.64995e+06	7.91972e+06	8.39148e+06	8.40806e+06	7.31652e+06	9.99715e+06	8.40569e+06	1.90412e+07	1.29238e+07	3.14673e+07	2.275e+07	1.82308e+07	2.59031e+07	1.02385e+07	1.85212e+07	1.21259e+07	2.18071e+07	2.00208e+07	7.69168e+06
	FALSE	Deoxycholic acid	C24 H40 O4	Full match	Full match	No results	No results	Not the top hit	-1.34	392.292	391.285	8.667	3.1158e+07	19	2	0	96.3	9.8			Endogenous Metabolites		Autoprocessed-8527	No matches found	No matches found	DDA for preferred ion	[M-H]-1	2.42098e+06	5.43555e+06	297410	5.89548e+06	244064	6.01984e+06	3.18352e+06	1.7012e+07	3.121e+06	3.07007e+06	2.20603e+06	6.53166e+06	4.17868e+06	1.13535e+06	5.32201e+06	2.90432e+06	1.09548e+07	953661	3.68569e+06	1.11446e+06	3.84772e+06	1.08068e+06
	FALSE	?-Muricholic Acid	C24 H40 O5	Full match	Full match	No results	No results	Not the top hit	-1.71	408.287	407.28	8.737	3.04399e+07	20	5	0	98	9.9			Endogenous Metabolites		Autoprocessed-8518	No matches found	No matches found	DDA for preferred ion	[M-H]-1	856313	3.06107e+06	429086	512708	365108	252822	888796	3.04399e+07	1.18347e+06	1.11674e+06	4.48751e+06	1.49937e+06	3.40657e+06	2.32944e+06	1.6302e+06	3.28803e+06	486807	2.25209e+06	967006	702126	1.99341e+06	1.16227e+06
	FALSE	1,5-Isoquinolinediol	C9 H7 N O2	Full match	Full match	No results	Partial match	Partial match	-2.67	161.047	160.04	1.166	2.97539e+07	11	6	0	91.4	9.6	56.9		Therapeutics/Prescription Drugs		Reference-2549	No matches found	No matches found	DDA for preferred ion	[M-H]-1	1.62081e+07	1.97204e+07	2.18484e+07	1.75977e+07	1.84678e+07	2.01223e+07	2.63537e+07	2.45275e+07	1.80528e+07	1.66371e+07	2.10017e+07	1.33506e+07	2.01726e+07	2.08627e+07	2.97539e+07	2.41245e+07	2.76542e+07	2.4752e+07	2.26383e+07	1.99101e+07	1.85178e+07	2.01161e+07
	FALSE	β-Muricholic acid	C24 H40 O5	Full match	Full match	No results	No results	Not the top hit	-1.79	408.287	407.28	8.947	2.96383e+07	20	5	0	98.6	9.9			Endogenous Metabolites		Autoprocessed-8518	No matches found	No matches found	DDA for preferred ion	[M-H]-1	1.09201e+06	2.49361e+06	591037	593439	516418	336846	474405	772837	6.97656e+06	1.73486e+06	3.33405e+06	857056	2.20027e+06	8.2672e+06	1.36375e+06	9.85169e+06	515944	5.36299e+06	1.92922e+06	2.40776e+06	3.28049e+06	4.80735e+06
	FALSE	?-Muricholic Acid	C24 H40 O5	Full match	Full match	No results	No results	Not the top hit	-1.32	408.287	407.28	11.755	2.93771e+07	20	5	0	98.5	9.9			Endogenous Metabolites		Autoprocessed-8518	No matches found	No matches found	DDA for preferred ion	[M-H]-1	1.2005e+06	218646	781826	520100	2.7024e+06	795222	693258	345516	668346	76960.2	1.86084e+06	1.36289e+06	457098	327968	612959	4.12638e+06	2.34545e+06	612949	8.02098e+06	817794	2.93771e+07	1.72787e+06
	FALSE	Glycine	C2 H5 N O2	Full match	Full match	No results	Full match	Full match	-2.48	75.0318	74.0246	11.812	2.91891e+07	4	2	0	99.7	10			Endogenous Metabolites; Therapeutics/Prescription Drugs; Industrial Chemicals; Natural Products/Medicines; Excipients/Additives/Colorants; Personal Care Products/Cosmetics	C00037	Reference-2524	No matches found	No matches found	DDA for preferred ion	[M-H]-1	6.30231e+06	1.30383e+07	6.55469e+06	8.1917e+06	8.05775e+06	8.22607e+06	5.78715e+06	9.85123e+06	5.38188e+06	1.60672e+07	1.97009e+07	1.0464e+07	9.29468e+06	1.35867e+07	1.96904e+07	2.34344e+07	6.82797e+06	1.47238e+07	1.66745e+07	2.91891e+07	1.13175e+07	1.16435e+07
	FALSE	Asiatic acid	C30 H48 O5	Not the top hit	Full match	No results	No results	Partial match	-0.66	488.35	487.343	1.709	2.87203e+07	10	3	0	94.2	9.7			Endogenous Metabolites; Natural Products/Medicines		Autoprocessed-5738	No matches found	No matches found	DDA for preferred ion	[M-H]-1	1.91563e+07	1.41334e+07	1.84045e+07	2.34818e+07	2.07997e+07	1.86703e+07	2.67954e+07	2.15362e+07	2.00671e+07	1.1669e+07	1.65474e+07	1.61261e+07	1.97296e+07	1.7411e+07	2.09855e+07	1.82896e+07	1.3998e+07	2.17068e+07	1.57722e+07	2.3948e+07	1.50807e+07	1.77858e+07
	FALSE	?-Muricholic Acid	C24 H40 O5	Full match	Full match	No results	No results	Not the top hit	-1.82	408.287	407.28	8.853	2.86382e+07	20	5	0	97.1	9.9			Endogenous Metabolites		Autoprocessed-8518	No matches found	No matches found	DDA for preferred ion	[M-H]-1	983390	2.21824e+06	511948	473502	389333	311946	830512	187795	3.12362e+06	1.05422e+06	5.77731e+06	1.41107e+06	3.35574e+06	2.76212e+06	1.55701e+06	6.58317e+06	2.27363e+07	3.10988e+06	544334	2.27097e+06	3.77473e+06	4.84831e+06
	FALSE	N-Ethylglycine	C4 H9 N O2	Full match	Full match	No results	Partial match	Not the top hit	-1.96	103.063	102.056	10.377	2.81325e+07	17	3	0	98.5	9.9				C11735	Reference-1789	No matches found	No matches found	DDA for preferred ion	[M-H]-1	1.01751e+07	1.91658e+07	9.57909e+06	1.10408e+07	1.26355e+07	9.7193e+06	1.05242e+07	9.4537e+06	6.71417e+06	1.486e+07	1.87505e+07	9.64601e+06	1.23582e+07	1.9943e+07	1.52052e+07	2.26412e+07	9.77731e+06	1.76162e+07	1.24282e+07	2.81325e+07	9.51781e+06	1.29357e+07
	FALSE	Methylsuccinic acid	C5 H8 O4	Full match	Full match	No results	Partial match	Not the top hit	-2.58	132.042	131.035	11.495	2.76906e+07	16	3	0	88	50.8			Endogenous Metabolites		Reference-1337	No matches found	No matches found	DDA for preferred ion	[M-H]-1	1.0753e+07	8.98329e+06	1.41919e+07	1.90813e+07	1.19473e+07	1.58622e+07	2.76906e+07	1.17358e+07	1.03578e+07	8.7836e+06	9.38556e+06	8.59118e+06	1.22165e+07	2.03718e+07	1.48e+07	1.01631e+07	7.32182e+06	1.66877e+07	1.21542e+07	7.70554e+06	1.30887e+07	6.9959e+06
	FALSE	1,5-Isoquinolinediol	C9 H7 N O2	Full match	Full match	No results	Partial match	Partial match	-2.23	161.047	160.04	1.377	2.76353e+07	11	6	0	91.4	9.6	56.9		Therapeutics/Prescription Drugs		Reference-2549	No matches found	No matches found	DDA for preferred ion	[M-H]-1	2.11027e+07	2.66384e+07	2.20328e+07	2.23485e+07	1.96784e+07	2.25883e+07	2.50409e+07	2.23016e+07	2.45399e+07	1.60224e+07	2.24963e+07	1.95307e+07	2.24302e+07	2.60944e+07	2.20139e+07	1.55999e+07	2.35036e+07	2.76353e+07	2.44584e+07	2.19144e+07	1.95088e+07	1.81415e+07
	FALSE	β-D-Glucopyranuronic acid	C6 H10 O7	Full match	Full match	No results	Not the top hit	Not the top hit	-2.5	194.042	193.035	8.957	2.76297e+07	12	2	0	89.9	51.3			Endogenous Metabolites	C08350	Reference-1214	No matches found	No matches found	DDA for preferred ion	[M-H]-1	7.05242e+06	1.27684e+07	1.09166e+07	1.46427e+07	9.69836e+06	9.07285e+06	1.30212e+07	1.2323e+07	5.19755e+06	9.73093e+06	1.16729e+07	6.90996e+06	1.44465e+07	1.3194e+07	1.69508e+07	1.0762e+07	9.28164e+06	1.47108e+07	1.01159e+07	2.76297e+07	6.51369e+06	7.54085e+06
	FALSE	Xanthurenic acid	C10 H7 N O4	No results	Invalid mass	No results	No results	No results	15.14	205.041	264.054	4.878	2.6802e+07	0	1	0	92.2	9.6			Endogenous Metabolites	C02470	Reference-789	No matches found	No matches found	DDA for preferred ion	[M-H+HAc]-1	1.9433e+07	1.91673e+07	1.52354e+07	1.52369e+07	1.24938e+07	1.17808e+07	8.38885e+06	1.4703e+07	2.05764e+07	1.60172e+07	1.78536e+07	1.43899e+07	1.90674e+07	2.48719e+07	1.43369e+07	2.17176e+07	2.33277e+07	1.20974e+07	1.31418e+07	1.34082e+07	2.02986e+07	2.09687e+07
	FALSE	NP-011548	C18 H34 O3	Full match	Full match	No results	No results	Partial match	-2.1	298.25	297.243	8.776	2.60104e+07	8	1	0	93.7	9.7			Endogenous Metabolites; Natural Products/Medicines		Autoprocessed-6496	No matches found	No matches found	DDA for preferred ion	[M-H]-1	5.43108e+06	9.02766e+06	4.67202e+06	5.40965e+06	4.35679e+06	4.10011e+06	4.40485e+06	2.76772e+06	7.57903e+06	4.45001e+06	7.64101e+06	5.64972e+06	2.60104e+07	5.89863e+06	5.16047e+06	2.57738e+06	5.02337e+06	7.77088e+06	5.66058e+06	2.50389e+06	3.19655e+06	1.69084e+06
	FALSE	Acrylic acid	C3 H4 O2	Full match	Full match	No results	Not the top hit	Partial match	-3.16	72.0209	71.0136	7.727	2.57439e+07	4	1	0	98.9	9.9			Extractables/Leachables; Textile Chemicals/Auxiliary/Dyes; Personal Care Products/Cosmetics; Industrial Chemicals; Endogenous Metabolites; Excipients/Additives/Colorants	C00511	Reference-2696	No matches found	No matches found	DDA for preferred ion	[M-H]-1	1.27404e+07	2.57439e+07	1.24976e+07	1.28945e+07	1.66686e+07	1.67222e+07	1.77474e+07	1.47447e+07	1.51247e+07	1.1115e+07	1.47625e+07	1.27776e+07	1.60555e+07	1.81676e+07	1.79112e+07	1.93826e+07	1.40012e+07	1.49268e+07	1.08736e+07	1.62915e+07	1.75867e+07	1.48357e+07
	FALSE	β-Muricholic acid	C24 H40 O5	Full match	Full match	No results	No results	Not the top hit	-1.94	408.287	407.28	8.144	2.50132e+07	20	5	0	96.9	9.8			Endogenous Metabolites		Autoprocessed-8518	No matches found	No matches found	DDA for preferred ion	[M-H]-1	2.85415e+06	3.56245e+06	4.18255e+06	1.11191e+07	1.76807e+06	4.25866e+06	3.87843e+06	4.0196e+06	4.34948e+06	1.06649e+07	2.98159e+06	9.44928e+06	4.90334e+06	3.72122e+06	3.7691e+06	8.50707e+06	2.50132e+07	2.67816e+06	1.97834e+06	3.7262e+06	5.00679e+06	1.46653e+07
	FALSE	2-Hydroxyhippuric acid	C9 H9 N O4	Full match	Full match	No results	Partial match	Full match	-3.58	195.052	194.045	2.413	2.46974e+07	12	4	0	86.9	9.3			Endogenous Metabolites	C07588	Reference-529	No matches found	No matches found	DDA for preferred ion	[M-H]-1	1.73219e+07	2.00608e+07	1.42665e+07	1.90382e+07	1.93333e+07	1.49735e+07	1.32235e+07	1.30047e+07	1.51169e+07	1.52789e+07	1.89475e+07	1.50288e+07	1.91587e+07	1.69667e+07	1.85303e+07	2.17639e+07	1.54384e+07	2.46845e+07	1.52323e+07	2.10211e+07	1.13361e+07	8.42934e+06
	FALSE	N-[3-(2,6-dimethylmorpholino)propyl]-2,3,4,5,6-pentamethylbenzenesulfonamide	C20 H34 N2 O3 S	No match	Invalid mass	No results	No results	No results	14.94	382.235	381.227	7.684	2.46128e+07	0	1	0	92.3	9.6					Autoprocessed-2426	No matches found	No matches found	DDA for preferred ion	[M-H]-1	1.52013e+07	2.46128e+07	1.74451e+07	8.63217e+06	7.93444e+06	1.05479e+07	1.29919e+07	2.16094e+07	1.63983e+07	1.34575e+07	9.49619e+06	1.84892e+07	1.00997e+07	1.4622e+07	9.33571e+06	6.06958e+06	2.30097e+07	6.75054e+06	1.00187e+07	1.31192e+07	6.73246e+06	2.1232e+07
	FALSE	β-Muricholic acid	C24 H40 O5	Full match	Full match	No results	No results	Not the top hit	-1.77	408.287	407.28	8.385	2.42145e+07	20	5	0	99.5	10			Endogenous Metabolites		Autoprocessed-8518	No matches found	No matches found	DDA for preferred ion	[M-H]-1	5.52577e+06	3.49246e+06	3.49998e+06	4.09607e+06	1.82985e+06	1.32133e+06	2.46912e+06	1.79737e+06	2.04492e+06	6.59605e+06	2.81086e+06	4.42787e+06	2.03643e+06	1.18458e+07	2.70031e+06	7.57646e+06	1.01903e+07	991118	1.10951e+06	3.30624e+06	3.17822e+06	3.56602e+06
	FALSE	{4-[3-(5-fluoro-1H-indol-3-yl)propyl]piperazino}(4-methoxyphenyl)methanone	C23 H26 F N3 O2	No match	Invalid mass	No results	No results	No results	-11.63	395.196	394.189	4.776	2.41487e+07	0	3	0	90.7	9.5					Autoprocessed-274	No matches found	No matches found	DDA for preferred ion	[M-H]-1	2.16653e+07	4.85336e+06	1.18714e+07	1.18943e+07	7.4119e+06	1.00448e+07	5.65133e+06	1.66204e+07	1.84004e+07	1.53915e+07	4.50708e+06	1.69453e+07	4.02114e+06	1.55359e+07	7.9266e+06	2.17048e+06	1.93839e+07	2.90757e+06	7.26142e+06	1.8175e+06	8.24118e+06	6.58236e+06
	FALSE	(3β,5ξ,9ξ)-3,23-Dihydroxy-1-oxoolean-12-en-28-oic acid	C30 H46 O5	Not the top hit	Full match	No results	No results	Partial match	-1.6	486.334	485.326	1.161	2.39064e+07	8	2	0	82.2	9.1					Reference-7834	No matches found	No matches found	DDA for preferred ion	[M-H]-1	1.82454e+07	1.57095e+07	1.67546e+07	2.39064e+07	2.04215e+07	1.84944e+07	2.06256e+07	1.86907e+07	1.59122e+07	8.86463e+06	1.46067e+07	1.4362e+07	1.40076e+07	9.88729e+06	1.70168e+07	1.00272e+07	9.40411e+06	9.44998e+06	1.26698e+07	1.18509e+07	1.2373e+07	1.97827e+07
	FALSE	Dinoterb	C10 H12 N2 O5	No match	Invalid mass	No results	No results	No match	12.27	240.078	239.07	6.014	2.34824e+07	11	2	0	88.3	9.4			Pesticides/Herbicides	C18671	Reference-1603	No matches found	No matches found	DDA for preferred ion	[M-H]-1	1.67584e+07	1.0956e+07	1.02701e+07	1.13033e+07	1.02696e+07	8.9255e+06	6.75606e+06	1.21302e+07	1.75992e+07	1.8655e+07	1.09069e+07	1.45902e+07	1.31904e+07	1.35521e+07	8.12461e+06	1.40407e+07	1.37116e+07	9.19722e+06	1.03409e+07	1.16981e+07	1.48292e+07	1.29357e+07
	FALSE	(3β,5ξ,9ξ)-3,23-Dihydroxy-1-oxoolean-12-en-28-oic acid	C30 H46 O5	Not the top hit	Full match	No results	No results	Partial match	-1.54	486.334	485.327	1.447	2.33718e+07	8	2	0	88.1	9.4					Reference-7834	No matches found	No matches found	DDA for preferred ion	[M-H]-1	1.01156e+07	6.89523e+06	8.32919e+06	1.45874e+07	1.38823e+07	1.26013e+07	8.10519e+06	1.22153e+07	9.27627e+06	1.21094e+07	7.98549e+06	9.35054e+06	7.60372e+06	7.30907e+06	8.49834e+06	8.75307e+06	7.44138e+06	5.7596e+06	7.76555e+06	2.33718e+07	1.14053e+07	1.29184e+07
	FALSE	β-Muricholic acid	C24 H40 O5	Full match	Full match	No results	No results	Not the top hit	-1.87	408.287	407.28	8.222	2.3368e+07	20	5	0	96.9	9.8			Endogenous Metabolites		Autoprocessed-8518	No matches found	No matches found	DDA for preferred ion	[M-H]-1	2.73609e+06	3.63028e+06	2.41755e+06	4.02247e+06	2.32596e+06	2.11987e+06	1.37534e+06	2.96767e+06	3.38299e+06	7.0414e+06	2.05118e+06	7.54915e+06	3.30978e+06	3.66111e+06	3.67241e+06	7.34586e+06	1.16972e+06	5.37785e+06	1.50616e+06	2.58667e+06	6.31982e+06	2.3368e+07
	FALSE	4-[2-(2,3-Dihydroxy-5,6,8a-trimethyloctahydro-2H-spiro[naphthalene-1,2'-oxiran]-5-yl)ethyl]-5-hydroxy-2(5H)-furanone	C20 H30 O6	Not the top hit	Full match	No results	No results	Partial match	-2.22	366.203	365.196	7.393	2.32439e+07	5	4	0	90.6	52.6	68.1				Reference-7474	No matches found	No matches found	DDA for preferred ion	[M-H]-1	1.63431e+07	1.64817e+07	2.26712e+07	1.417e+07	1.16658e+07	1.08173e+07	9.99645e+06	1.47485e+07	1.58494e+07	9.79825e+06	1.18869e+07	1.3388e+07	2.03486e+07	1.4224e+07	9.00313e+06	1.17675e+07	2.32439e+07	1.04765e+07	9.1226e+06	5.00948e+06	1.15095e+07	1.20988e+07
	FALSE	2-(acetylamino)-3-(1H-indol-3-yl)propanoic acid	C13 H14 N2 O3	Full match	Full match	No results	Partial match	Not the top hit	-2.6	246.1	245.092	5.645	2.25051e+07	5	1	0	80.6	67					Autoprocessed-4821	No matches found	No matches found	DDA for preferred ion	[M-H]-1	8.48817e+06	6.64814e+06	5.32091e+06	1.01181e+07	6.29609e+06	6.13568e+06	1.07879e+07	4.73057e+06	7.83859e+06	9.10407e+06	7.42356e+06	4.64029e+06	1.35587e+07	1.54861e+07	2.25051e+07	1.84641e+07	6.07791e+06	1.9228e+07	5.75277e+06	1.44759e+07	4.36055e+06	9.55951e+06
	FALSE	1,5-Isoquinolinediol	C9 H7 N O2	No match	Invalid mass	No results	No match	No match	111831	179.058	178.051	2.147	2.19745e+07	7	3	0	99	9.9			Therapeutics/Prescription Drugs		Reference-2549	No matches found	No matches found	DDA for other ion	[M-H]-1	1.45583e+07	2.19745e+07	9.92481e+06	1.52922e+07	1.76769e+07	1.21147e+07	4.49478e+06	7.81638e+06	1.31735e+07	1.89538e+07	7.42014e+06	1.48794e+07	1.33808e+07	1.76481e+07	8.93884e+06	1.37401e+07	1.3055e+07	1.58391e+07	1.02849e+07	7.28594e+06	1.22615e+07	3.66828e+06
	FALSE	Undecanoic acid	C11 H22 O2	Full match	Full match	No results	No results	Full match	-2.07	186.162	185.154	1.282	2.17727e+07	24	1	0	81.3	9.1			Extractables/Leachables; Endogenous Metabolites; Excipients/Additives/Colorants; Personal Care Products/Cosmetics	C17715	Reference-2682	No matches found	No matches found	DDA for preferred ion	[M-H]-1	1.72407e+07	2.17727e+07	1.01885e+07	1.33293e+07	1.7201e+07	1.51077e+07	1.51352e+07	1.15044e+07	1.15069e+07	9.49806e+06	1.36634e+07	1.38919e+07	1.43571e+07	1.51925e+07	1.27605e+07	1.12405e+07	1.28335e+07	1.06982e+07	1.07324e+07	8.83472e+06	1.4878e+07	1.63863e+07
	FALSE	Ferulic acid	C10 H10 O4	No match	Invalid mass	No results	No results	No match	-309297	134.036	133.029	3.051	2.1623e+07	5	3	0	96.8	90.7	60.4		Endogenous Metabolites; Excipients/Additives/Colorants	C01494	Reference-421	No matches found	No matches found	DDA for other ion	[M-H]-1	4.86395e+06	2.7364e+06	8.57619e+06	1.08291e+07	1.64215e+06	3.45189e+06	1.05112e+07	7.80941e+06	4.60256e+06	7.52864e+06	6.56865e+06	3.94095e+06	6.57925e+06	2.11693e+07	2.1623e+07	6.10642e+06	6.47029e+06	8.24235e+06	9.08171e+06	1.23385e+07	2.68257e+06	4.33416e+06
	FALSE	2-(acetylamino)-4-(methylthio)butanoic acid	C7 H13 N O3 S	No match	Invalid mass	No results	No results	No match	-20.7	191.058	190.05	5.667	2.12034e+07	4	2	0	97.7	94					Autoprocessed-5545	No matches found	No matches found	DDA for preferred ion	[M-H]-1	4.19681e+06	6.80284e+06	4.31333e+06	2.55203e+06	1.59028e+06	5.44725e+06	4.45646e+06	4.62946e+06	7.21007e+06	8.34536e+06	1.28447e+06	2.16779e+06	5.82616e+06	1.05989e+07	1.19232e+07	1.60694e+07	2.19019e+06	2.49028e+06	8.42387e+06	2.12034e+07	1.39688e+06	3.07884e+06
	FALSE	4-benzyl 2-ethyl 3-(2-ethoxy-2-oxoethyl)-5-methyl-1H-pyrrole-2,4-dicarboxylate	C20 H23 N O6	No match	Invalid mass	No results	No results	No results	6.81	373.155	372.148	3.802	2.04979e+07	0	3	0	82.3	67					Autoprocessed-247	No matches found	No matches found	DDA for preferred ion	[M-H]-1	2.00965e+07	8.15948e+06	7.82142e+06	1.19059e+07	1.10939e+07	2.04979e+07	1.7593e+07	1.10337e+07	6.7808e+06	1.36875e+07	7.11645e+06	1.68977e+07	6.25375e+06	1.00162e+07	1.47836e+07	1.12598e+06	1.45851e+07	5.18292e+06	1.08483e+07	5.61022e+06	7.33846e+06	1.82553e+07
	FALSE	N-[3-(2,6-dimethylmorpholino)propyl]-2,3,4,5,6-pentamethylbenzenesulfonamide	C20 H34 N2 O3 S	No match	Invalid mass	No results	No results	No results	15.15	382.235	381.228	7.867	2.04808e+07	0	2	0	95.1	9.8	58.3				Autoprocessed-2426	No matches found	No matches found	DDA for preferred ion	[M-H]-1	1.70958e+07	1.14707e+07	9.21645e+06	1.23093e+07	9.92413e+06	1.10825e+07	1.1544e+07	9.68284e+06	1.22527e+07	1.49498e+07	1.25026e+07	1.43557e+07	1.31848e+07	1.27133e+07	9.33254e+06	1.10535e+07	1.13038e+07	9.56945e+06	1.0374e+07	8.02244e+06	1.17528e+07	2.04808e+07
	FALSE	?17-6-keto Prostaglandin F1?	C20 H32 O6	No match	Invalid mass	No results	No results	No match	-48914.3	350.209	349.201	6.929	2.01992e+07	19	13	0	87.2	50.6			Endogenous Metabolites		Autoprocessed-8447	No matches found	No matches found	DDA for preferred ion	[M-H]-1	1.77917e+07	1.46259e+07	1.81298e+07	1.29717e+07	9.79501e+06	1.02074e+07	1.13291e+07	1.27968e+07	1.37127e+07	1.05691e+07	1.20193e+07	1.13273e+07	1.50383e+07	1.45724e+07	1.27602e+07	1.52181e+07	1.94086e+07	1.05119e+07	1.04333e+07	8.1148e+06	1.06873e+07	1.45327e+07
	FALSE	3-Aminosalicylic acid	C7 H7 N O3	Full match	Full match	No results	Partial match	Not the top hit	-2	153.042	152.035	7.306	2.00997e+07	7	4	0	82.6	9.1			Industrial Chemicals		Reference-192	No matches found	No matches found	DDA for preferred ion	[M-H]-1	1.72008e+07	1.05181e+07	9.41729e+06	1.08121e+07	6.63731e+06	1.10223e+07	1.15366e+07	1.1888e+07	1.55306e+07	1.03131e+07	8.34684e+06	7.72531e+06	1.62475e+07	1.35478e+07	1.56145e+07	1.69123e+07	2.00997e+07	1.68482e+07	8.9064e+06	8.3708e+06	6.78093e+06	1.1347e+07
	FALSE	β-Muricholic acid	C24 H40 O5	Full match	Full match	No results	No results	Not the top hit	-2.43	408.287	407.279	8.028	1.85772e+07	20	5	0	95.3	9.8			Endogenous Metabolites		Autoprocessed-8518	No matches found	No matches found	DDA for preferred ion	[M-H]-1	2.16198e+06	2.8006e+06	3.27508e+06	1.11191e+07	1.51314e+06	1.09173e+06	1.36557e+06	2.20631e+06	5.69137e+06	8.33569e+06	2.05368e+06	1.21715e+07	4.90334e+06	2.49167e+06	1.47599e+06	6.60533e+06	1.85772e+07	2.67816e+06	1.55689e+06	5.0514e+06	5.54202e+06	7.50064e+06
	FALSE	Dodecyl sulfate	C12 H26 O4 S	No match	Invalid mass	No results	No results	No match	67655.3	284.162	283.155	1.402	1.83395e+07	1	5	0	93.2	9.7			Personal Care Products/Cosmetics	C08031	Reference-1348	No matches found	No matches found	DDA for other ion	[M-H]-1	9.55642e+06	1.25609e+07	7.7436e+06	1.14213e+07	8.67849e+06	1.54679e+07	5.42806e+06	1.01426e+07	3.46105e+06	8.20727e+06	1.34905e+07	8.1013e+06	1.29405e+07	8.94709e+06	9.4408e+06	6.94768e+06	9.8782e+06	4.91513e+06	8.86949e+06	9.0913e+06	7.71123e+06	1.31905e+07
	FALSE	NP-011548	C18 H34 O3	Full match	Full match	No results	No results	Partial match	-1.94	298.25	297.243	8.189	1.8203e+07	8	1	0	85	9.3			Endogenous Metabolites; Natural Products/Medicines		Autoprocessed-6496	No matches found	No matches found	DDA for preferred ion	[M-H]-1	2.4005e+06	8.47975e+06	9.8559e+06	5.77126e+06	1.8203e+07	2.46689e+06	3.85298e+06	4.02168e+06	4.83228e+06	1.14627e+07	4.00988e+06	6.71683e+06	3.18743e+06	3.16523e+06	2.13645e+06	5.52535e+06	6.76328e+06	4.56609e+06	3.41583e+06	3.57909e+06	6.82687e+06	7.49968e+06
	FALSE	Acrylic acid	C3 H4 O2	Full match	Full match	No results	Not the top hit	Partial match	-4.04	72.0208	71.0136	1.525	1.76319e+07	4	1	0	99.6	10			Extractables/Leachables; Textile Chemicals/Auxiliary/Dyes; Personal Care Products/Cosmetics; Industrial Chemicals; Endogenous Metabolites; Excipients/Additives/Colorants	C00511	Reference-2696	No matches found	No matches found	DDA for preferred ion	[M-H]-1	7.17992e+06	1.1481e+07	1.21287e+07	1.31475e+07	8.7502e+06	6.77149e+06	8.56214e+06	1.01315e+07	6.70264e+06	9.0722e+06	9.12603e+06	9.91069e+06	6.19106e+06	8.06623e+06	5.83169e+06	5.61258e+06	6.93196e+06	1.52613e+07	7.74659e+06	1.76319e+07	7.46213e+06	1.30188e+07
	FALSE	Linoleic acid	C18 H32 O2	Full match	Full match	No results	Full match	Full match	-1.59	280.24	279.233	6.768	1.7376e+07	12	4	0	97.2	9.9			Endogenous Metabolites		Autoprocessed-8545	No matches found	No matches found	DDA for preferred ion	[M-H]-1	1.01579e+07	1.12118e+07	7.12907e+06	9.3465e+06	1.41742e+07	9.26012e+06	1.7376e+07	1.05424e+07	1.6982e+07	5.37172e+06	9.18492e+06	9.89225e+06	1.20876e+07	1.54604e+07	1.17642e+07	1.55878e+07	1.38652e+07	1.49972e+07	9.49167e+06	8.61225e+06	8.44205e+06	9.45481e+06
	FALSE	2-Hydroxyhippuric acid	C9 H9 N O4	Full match	Full match	No results	Partial match	Full match	-1.79	195.053	194.045	1.354	1.73581e+07	12	4	0	93.7	9.7			Endogenous Metabolites	C07588	Reference-529	No matches found	No matches found	DDA for preferred ion	[M-H]-1	6.81699e+06	1.67876e+07	1.26655e+07	1.3901e+07	1.50608e+07	1.41302e+07	1.16527e+07	1.18306e+07	9.17062e+06	9.61627e+06	1.50406e+07	4.78227e+06	1.73581e+07	1.10807e+07	1.4041e+07	1.14734e+07	7.46485e+06	7.63322e+06	1.38726e+07	7.83688e+06	5.39934e+06	1.09357e+07
	FALSE	β-Muricholic acid	C24 H40 O5	Full match	Full match	No results	No results	Not the top hit	-1.7	408.287	407.28	8.455	1.70135e+07	20	5	0	99.5	10			Endogenous Metabolites		Autoprocessed-8518	No matches found	No matches found	DDA for preferred ion	[M-H]-1	1.49831e+07	1.80128e+06	3.65431e+06	8.74091e+06	831150	3.13225e+06	2.55269e+06	1.79659e+06	3.37592e+06	6.72227e+06	5.40998e+06	9.77737e+06	2.15973e+06	4.26461e+06	2.65793e+06	1.10094e+07	6.38349e+06	1.33572e+06	2.73628e+06	4.02758e+06	2.27233e+06	9.78534e+06
	FALSE	Deoxycholic Acid	C24 H40 O4	Full match	Full match	No results	No results	Not the top hit	-1.27	392.292	391.285	8.943	1.7012e+07	19	2	0	98.5	9.9			Endogenous Metabolites		Autoprocessed-8527	No matches found	No matches found	DDA for preferred ion	[M-H]-1	550192	110417	367514	296737	232306	279156	217443	1.7012e+07	5.53025e+06	504734	2.1695e+06	1.18414e+06	2.32672e+06	1.18041e+06	1.0073e+06	6.00177e+06	1.09548e+07	2.81923e+06	481417	2.20497e+06	1.07946e+06	1.90458e+06
	FALSE	NP-011548	C18 H34 O3	Full match	Full match	No results	No results	Partial match	-2.18	298.25	297.243	8.482	1.66733e+07	8	1	0	91.7	9.6			Endogenous Metabolites; Natural Products/Medicines		Autoprocessed-6496	No matches found	No matches found	DDA for preferred ion	[M-H]-1	9.54315e+06	3.8458e+06	9.8559e+06	5.26883e+06	1.77596e+06	5.37429e+06	5.63273e+06	2.29819e+06	2.83091e+06	2.96908e+06	1.66733e+07	4.74361e+06	1.63575e+06	2.37978e+06	2.34086e+06	3.65432e+06	1.99745e+06	3.28147e+06	3.47705e+06	9.66105e+06	2.30197e+06	5.62387e+06
	FALSE	Oleic acid	C18 H34 O2	No match	Invalid mass	No results	No results	No match	63807.2	300.266	299.259	11.095	1.62752e+07	12	3	0	89	9.4			Endogenous Metabolites; Extractables/Leachables; Excipients/Additives/Colorants; Personal Care Products/Cosmetics; Industrial Chemicals	C00712	Reference-10	No matches found	No matches found	DDA for other ion	[M-H]-1	1.69062e+06	1.43836e+06	1.18131e+06	1.04939e+06	890168	937559	406498	795430	1.01556e+06	776500	460609	405019	339105	344232	583448	2.15887e+06	306347	1.42376e+06	303259	296409	295766	526522
	FALSE	?-Muricholic Acid	C24 H40 O5	Full match	Full match	No results	No results	Not the top hit	-1.22	408.287	407.28	10.363	1.58082e+07	20	5	0	86.4	9.3			Endogenous Metabolites		Autoprocessed-8518	No matches found	No matches found	DDA for preferred ion	[M-H]-1	5.98197e+06	129713	2.86987e+06	80027.3	2.31944e+06	489204	5.47277e+06	185707	4.94035e+06	1.58082e+07	365113	449488	183107	628596	4.85581e+06	279095	813891	1.66992e+06	211098	1.08713e+06	357744	3.35583e+06
	FALSE	4-Oxoproline	C5 H7 N O3	No match	Invalid mass	No results	No results	No results	-356516	83.0368	82.0296	9.031	1.56052e+07	0	1	0	98.4	9.9			Endogenous Metabolites	C01877	Reference-1268	No matches found	No matches found	DDA for other ion	[M-H]-1	1.95473e+06	2.47229e+06	2.40748e+06	2.49773e+06	2.32486e+06	1.56052e+07	2.96278e+06	2.93845e+06	1.6822e+06	2.8132e+06	2.88546e+06	2.0396e+06	2.62364e+06	2.63743e+06	2.64681e+06	2.89616e+06	2.31658e+06	2.70333e+06	3.49244e+06	4.09897e+06	2.50851e+06	1.99905e+06
	FALSE	8-Iso-15-keto-prostaglandin-F2β	C20 H32 O5	Full match	Full match	No results	No results	Not the top hit	-2.11	352.224	351.217	7.618	1.54566e+07	35	19	0	91.6	9.6			Endogenous Metabolites		Reference-4598	No matches found	No matches found	DDA for preferred ion	[M-H]-1	1.29332e+07	7.99923e+06	6.35179e+06	7.00761e+06	5.58205e+06	7.45011e+06	7.36556e+06	6.57841e+06	9.23444e+06	6.72297e+06	1.07231e+07	9.86571e+06	5.48179e+06	7.82406e+06	6.91715e+06	6.91679e+06	7.23412e+06	4.62826e+06	6.68597e+06	5.72187e+06	8.33683e+06	1.20604e+07
	FALSE	?-Muricholic Acid	C24 H40 O5	Not the top hit	Full match	No results	No results	Not the top hit	-1.65	408.287	407.28	11.231	1.52689e+07	20	5	0	97.8	9.9			Endogenous Metabolites		Autoprocessed-8518	No matches found	No matches found	DDA for preferred ion	[M-H]-1	2.38688e+06	943101	1.92383e+06	685465	801220	258709	565167	1.33935e+06	1.96168e+06	642824	468328	1.66885e+06	2.94775e+06	317628	328756	5.6117e+06	237088	1.98014e+06	246929	1.57687e+06	477231	2.4857e+06
	FALSE	Deoxycholic acid	C24 H40 O4	Full match	Full match	No results	No results	Not the top hit	-1.54	392.292	391.285	8.5	1.44644e+07	19	2	0	97.3	9.9			Endogenous Metabolites		Autoprocessed-8527	No matches found	No matches found	DDA for preferred ion	[M-H]-1	1.40187e+07	1.95944e+06	3.58796e+06	5.89548e+06	266821	6.01984e+06	3.18352e+06	1.04126e+06	3.121e+06	3.07007e+06	2.97785e+06	1.44644e+07	1.90541e+06	901183	1.28479e+06	5.3871e+06	1.91186e+06	953661	2.52143e+06	3.23264e+06	1.40924e+06	4.06459e+06
	FALSE	Deoxycholic acid	C24 H40 O4	Not the top hit	Full match	No results	No results	Not the top hit	-0.83	392.292	391.285	11.752	1.42268e+07	19	2	0	95.3	9.8			Endogenous Metabolites		Autoprocessed-8527	No matches found	No matches found	DDA for preferred ion	[M-H]-1	631360	462497	1.64927e+06	451801	1.6449e+06	430136	2.90226e+06	553347	677859	3.27359e+06	664281	779511	479126	214504	514276	1.03331e+06	2.36249e+06	455022	5.39147e+06	802551	1.42268e+07	869331
	FALSE	?-Muricholic Acid	C24 H40 O5	Full match	Full match	No results	No results	Not the top hit	-1.85	408.287	407.28	11.655	1.39765e+07	20	5	0	98.5	9.9			Endogenous Metabolites		Autoprocessed-8518	No matches found	No matches found	DDA for preferred ion	[M-H]-1	621825	105663	535455	274062	892799	795222	331602	413473	181543	210015	1.18128e+06	224087	159395	147905	251876	4.12638e+06	484399	612949	1.39765e+07	557968	91194.9	717059
	FALSE	Linoleic acid	C18 H32 O2	Full match	Full match	No results	Full match	Full match	-1.93	280.24	279.232	0.822	1.36938e+07	12	4	0	97.4	9.9			Endogenous Metabolites		Autoprocessed-8545	No matches found	No matches found	DDA for preferred ion	[M-H]-1	8.43353e+06	2.76706e+06	2.90582e+06	646025	2.45417e+06	1.81618e+06	1.18116e+06	1.20124e+06	3.9192e+06	3.12845e+06	2.98669e+06	4.34885e+06	3.58579e+06	2.07293e+06	2.24088e+06	4.11856e+06	5.41765e+06	1.36928e+06	3.34208e+06	3.1873e+06	2.02563e+06	3.60674e+06
	FALSE	4-Pyridoxic acid	C8 H9 N O4	No match	Invalid mass	No results	No results	No match	16.27	183.056	182.049	7.605	1.35985e+07	1	3	0	89.7	9.5	58.6		Endogenous Metabolites	C00847	Reference-1	No matches found	No matches found	DDA for preferred ion	[M-H]-1	4.01301e+06	1.35985e+07	2.50855e+06	3.68519e+06	2.55275e+06	3.60065e+06	1.45794e+06	2.46378e+06	4.29231e+06	1.60404e+06	3.20929e+06	2.29499e+06	5.19474e+06	3.02247e+06	2.0275e+06	6.89631e+06	1.8498e+06	2.4324e+06	1.65968e+06	1.65874e+06	1.42384e+06	2.45599e+06
	FALSE	Deoxycholic acid	C24 H40 O4	Not the top hit	Full match	No results	No results	Not the top hit	-1.49	392.292	391.285	11.658	1.33305e+07	19	2	0	98.8	9.9			Endogenous Metabolites		Autoprocessed-8527	No matches found	No matches found	DDA for preferred ion	[M-H]-1	1.39446e+06	1.39663e+06	2.69318e+06	1.30531e+06	5.38628e+06	931693	1.86976e+06	1.27046e+06	1.32143e+06	3.27359e+06	1.26038e+06	1.86839e+06	2.38537e+06	514860	389465	6.20519e+06	3.8877e+06	1.27154e+06	9.28462e+06	1.40384e+06	1.33305e+07	2.35765e+06
	FALSE	Deoxycholic acid	C24 H40 O4	Full match	Full match	No results	No results	Not the top hit	-1.33	392.292	391.285	8.315	1.33257e+07	19	2	0	97.3	9.9			Endogenous Metabolites		Autoprocessed-8527	No matches found	No matches found	DDA for preferred ion	[M-H]-1	7.90165e+06	6.66343e+06	3.58796e+06	2.88118e+06	2.76336e+06	6.01984e+06	4.99413e+06	1.04126e+06	3.43151e+06	6.70885e+06	2.97956e+06	7.11696e+06	2.29692e+06	4.6785e+06	1.58098e+06	6.82036e+06	5.22192e+06	5.10352e+06	2.03052e+06	3.23264e+06	2.54251e+06	1.25285e+07
	FALSE	Deoxycholic acid	C24 H40 O4	No match	Invalid mass	No results	No results	No match	-500000	196.146	195.139	2.428	1.32758e+07	24	2	0	99.3	10			Endogenous Metabolites	C11171	Reference-388	No matches found	No matches found	DDA for other ion	[M-H]-1	7.84741e+06	7.94597e+06	7.3218e+06	5.42433e+06	2.79599e+06	8.22603e+06	1.0453e+07	6.59916e+06	2.91757e+06	5.00716e+06	1.75075e+06	3.15112e+06	6.83461e+06	9.87005e+06	4.97313e+06	6.93581e+06	5.89083e+06	6.15711e+06	4.37434e+06	2.44975e+06	3.18809e+06	7.02676e+06
	FALSE	3-Aminosalicylic acid	C7 H7 N O3	No match	Invalid mass	No results	No results	No results	19.68	153.046	152.038	7.385	1.32287e+07	0	4	0	82.6	9.1			Industrial Chemicals		Reference-192	No matches found	No matches found	DDA for preferred ion	[M-H]-1	7.82794e+06	1.05336e+07	4.37392e+06	5.45092e+06	4.92944e+06	4.70093e+06	5.17698e+06	5.67626e+06	6.37153e+06	5.24674e+06	8.43832e+06	5.04187e+06	9.50793e+06	7.11231e+06	6.21307e+06	1.02744e+07	4.40488e+06	5.65801e+06	4.94975e+06	6.22233e+06	4.78931e+06	5.78224e+06
	FALSE	Arjungenin	C30 H48 O6	No match	Invalid mass	No results	No match	No match	-500001	252.172	251.165	2.42	1.32212e+07	18	2	0	86.6	9.3					Reference-7797	No matches found	No matches found	DDA for other ion	[M-H]-1	3.62473e+06	1.50193e+06	1.32406e+06	907758	634541	2.44777e+06	1.35632e+06	1.42705e+06	732968	1.38317e+06	990085	1.04731e+06	1.27149e+06	1.09561e+06	1.51199e+06	762412	820177	749573	4.27572e+06	839854	777391	1.02888e+06
	FALSE	NP-019159	C26 H38 O8	No match	Invalid mass	No results	No results	No results	2118.39	479.27	478.263	1.438	1.30367e+07	0	2	0	87.3	9.4			Endogenous Metabolites; Natural Products/Medicines		Autoprocessed-5734	No matches found	No matches found	DDA for preferred ion	[M-H]-1	2.08431e+06	708179	1.22313e+06	969483	617059	819427	1.96881e+06	3.14756e+06	1.79193e+06	7.75786e+06	2.81959e+06	1.66027e+06	557056	5.99162e+06	2.61011e+06	830362	1.30367e+07	628885	704022	2.91206e+06	1.06066e+07	3.56406e+06
	FALSE	N-Acetyl-4-aminosalicylic acid	C9 H9 N O4	No match	Invalid mass	No results	No results	No match	92334.6	213.063	212.056	1.393	1.30106e+07	3	4	0	93.1	9.7			Therapeutics/Prescription Drugs		Reference-1372	No matches found	No matches found	DDA for other ion	[M-H]-1	4.27347e+06	5.84091e+06	6.29891e+06	3.92646e+06	3.70837e+06	3.96829e+06	3.30296e+06	6.3901e+06	6.32219e+06	4.45301e+06	8.55147e+06	4.19541e+06	7.49675e+06	7.29019e+06	5.80154e+06	1.30106e+07	5.34692e+06	6.5997e+06	3.66382e+06	4.59858e+06	8.1603e+06	1.03361e+07
	FALSE	2,4-Dihydroxybenzoic acid	C7 H6 O4	No match	Invalid mass	No results	No match	No match	116929	172.037	171.03	3.804	1.29107e+07	3	5	0	90	9.5			Endogenous Metabolites		Reference-156	No matches found	No matches found	DDA for other ion	[M-H]-1	8.54936e+06	1.29107e+07	7.34375e+06	7.72942e+06	6.57702e+06	8.58285e+06	4.59499e+06	8.80173e+06	8.05165e+06	8.73499e+06	5.75856e+06	8.90465e+06	1.06988e+07	7.46052e+06	7.91207e+06	7.33998e+06	8.56914e+06	7.826e+06	7.62734e+06	8.70409e+06	8.97134e+06	5.43616e+06
	FALSE	?-Muricholic Acid	C24 H40 O5	Full match	Full match	No results	No results	Not the top hit	-2.2	408.287	407.279	8.515	1.28632e+07	20	5	0	98	9.9			Endogenous Metabolites		Autoprocessed-8518	No matches found	No matches found	DDA for preferred ion	[M-H]-1	1.23179e+07	3.06107e+06	1.82396e+06	6.52518e+06	708207	4.56892e+06	2.68852e+06	1.69459e+06	2.69628e+06	7.02796e+06	5.40998e+06	5.21588e+06	1.51136e+06	3.66891e+06	3.58149e+06	7.80228e+06	3.82578e+06	1.59766e+06	3.26618e+06	7.4861e+06	2.69671e+06	6.90973e+06
	FALSE	Deoxycholic acid	C24 H40 O4	Not the top hit	Full match	No results	No results	Not the top hit	-1.42	392.292	391.285	10.067	1.26782e+07	19	2	0	98.3	9.9			Endogenous Metabolites		Autoprocessed-8527	No matches found	No matches found	DDA for preferred ion	[M-H]-1	244983	374148	2.20386e+06	130756	3.59406e+06	1.26782e+07	803189	521854	420871	4.08031e+06	399447	3.06042e+06	410775	225002	1.37407e+06	427675	535512	353353	287005	1.05594e+06	406060	1.12458e+06
	FALSE	NP-011548	C18 H34 O3	Full match	Full match	No results	No results	Partial match	-1.64	298.25	297.243	8.294	1.26395e+07	8	1	0	89	9.5			Endogenous Metabolites; Natural Products/Medicines		Autoprocessed-6496	No matches found	No matches found	DDA for preferred ion	[M-H]-1	2.80767e+06	4.85553e+06	9.8559e+06	2.56913e+06	2.03857e+06	2.07213e+06	1.78196e+06	1.82964e+06	2.20667e+06	1.14627e+07	2.60181e+06	2.44711e+06	1.59533e+06	6.00296e+06	1.90535e+06	4.3273e+06	3.25184e+06	3.36523e+06	1.64645e+06	9.66105e+06	2.07897e+06	3.07068e+06
	FALSE	Lithocholic Acid	C24 H40 O3	No match	Invalid mass	No results	No results	No results	999996	752.594	751.587	1.576	1.25504e+07	0	1	0	98.7	9.9			Endogenous Metabolites		Autoprocessed-8555	No matches found	No matches found	DDA for preferred ion	[M-H]-1	2.11088e+06	1.02057e+07	5.23244e+06	5.02189e+06	4.69005e+06	4.93991e+06	3.31796e+06	4.02091e+06	7.2727e+06	6.38391e+06	7.29193e+06	1.25504e+07	7.5388e+06	1.8513e+06	2.4333e+06	9.521e+06	6.55603e+06	5.33072e+06	2.66821e+06	1.2894e+06	3.06638e+06	2.06622e+06
	FALSE	Deoxycholic acid	C24 H40 O4	Full match	Full match	No results	No results	Not the top hit	-1.58	392.292	391.285	8.147	1.25285e+07	19	2	0	97.3	9.9			Endogenous Metabolites		Autoprocessed-8527	No matches found	No matches found	DDA for preferred ion	[M-H]-1	959513	5.78839e+06	3.58796e+06	2.88118e+06	795217	5.54308e+06	4.99413e+06	2.85567e+06	2.89215e+06	7.16258e+06	1.54129e+06	1.06642e+07	1.3862e+06	776337	1.08388e+06	1.91922e+06	1.17197e+07	4.72778e+06	2.03052e+06	528453	4.52747e+06	1.25285e+07
	FALSE	Deoxycholic acid	C24 H40 O4	Full match	Full match	No results	No results	Not the top hit	-1.53	392.292	391.285	8.224	1.25285e+07	19	2	0	97.3	9.9			Endogenous Metabolites		Autoprocessed-8527	No matches found	No matches found	DDA for preferred ion	[M-H]-1	2.33602e+06	4.94075e+06	3.58796e+06	2.88118e+06	2.55644e+06	3.68165e+06	4.99413e+06	2.85567e+06	2.59471e+06	4.54697e+06	983384	9.06852e+06	3.33971e+06	690356	2.7929e+06	1.63362e+06	5.74245e+06	4.72778e+06	1.95765e+06	486572	4.52747e+06	1.25285e+07
	FALSE	Deoxycholic acid	C24 H40 O4	Full match	Full match	No results	No results	Not the top hit	-1.38	392.292	391.285	8.392	1.25285e+07	19	2	0	97.3	9.9			Endogenous Metabolites		Autoprocessed-8527	No matches found	No matches found	DDA for preferred ion	[M-H]-1	1.04653e+07	2.32366e+06	3.58796e+06	2.64365e+06	1.15956e+06	6.01984e+06	3.18352e+06	1.04126e+06	1.87361e+06	3.50627e+06	2.21387e+06	5.61462e+06	2.17945e+06	2.38828e+06	1.58098e+06	4.44488e+06	5.76853e+06	1.02045e+06	869826	3.23264e+06	1.70663e+06	1.25285e+07
	FALSE	N-{[(2R,4S,5R)-5-(3-Cyclopentyl-1-methyl-1H-pyrazol-5-yl)-1-azabicyclo[2.2.2]oct-2-yl]methyl}-4-methoxybenzamide	C25 H34 N4 O2	Not the top hit	Full match	No results	No results	No match	-4.88	422.266	421.259	7.262	1.24486e+07	1	1	0	96.3	9.8					Reference-9074	No matches found	No matches found	DDA for preferred ion	[M-H]-1	7.54154e+06	6.12286e+06	5.23248e+06	6.57911e+06	5.69353e+06	5.26017e+06	5.40697e+06	6.84774e+06	8.54548e+06	9.67e+06	8.89872e+06	1.215e+07	5.67872e+06	8.85058e+06	6.07208e+06	8.71486e+06	7.43645e+06	4.61829e+06	6.4701e+06	6.62949e+06	6.87679e+06	9.61274e+06
	FALSE	Deoxycholic acid	C24 H40 O4	Full match	Full match	No results	No results	Not the top hit	-1.58	392.292	391.285	11.492	1.23115e+07	19	2	0	93.3	9.7			Endogenous Metabolites		Autoprocessed-8527	No matches found	No matches found	DDA for preferred ion	[M-H]-1	3.16752e+06	1.39663e+06	520765	461735	2.4431e+06	3.62633e+06	717895	510638	2.13717e+06	462763	393114	1.16774e+06	2.38537e+06	282103	389465	543694	444288	775053	1.39664e+06	645088	372029	1.25461e+06
	FALSE	Deoxycholic acid	C24 H40 O4	Full match	Full match	No results	No results	Not the top hit	-1.01	392.292	391.285	9.421	1.1695e+07	19	2	0	98.8	9.9			Endogenous Metabolites		Autoprocessed-8527	No matches found	No matches found	DDA for preferred ion	[M-H]-1	3.48935e+06	85551	2.44918e+06	3.20312e+06	76928.6	854048	1.37568e+06	822858	1.1695e+07	1.68977e+06	1.17296e+06	7.42332e+06	2.08003e+06	1.03163e+06	706629	3.90251e+06	7.31505e+06	1.47902e+06	1.45686e+06	1.29925e+06	1.99559e+06	3.06635e+06
	FALSE	NP-019159	C26 H38 O8	No results	Invalid mass	No results	No results	No results	2085.75	479.254	478.247	1.672	1.12994e+07	0	1	0	87.3	9.4			Endogenous Metabolites; Natural Products/Medicines		Autoprocessed-5734	No matches found	No matches found	DDA for preferred ion	[M-H]-1	9.91511e+06	1.77695e+06	5.20692e+06	6.9493e+06	3.53284e+06	2.81233e+06	5.43713e+06	8.20319e+06	7.79518e+06	7.04111e+06	2.88776e+06	5.76371e+06	3.72717e+06	8.92946e+06	5.6267e+06	4.16621e+06	8.38751e+06	3.63522e+06	4.54467e+06	2.48334e+06	4.7826e+06	4.67218e+06
	FALSE	Acrylic acid	C3 H4 O2	Full match	Full match	No results	Not the top hit	Partial match	-2.76	72.0209	71.0136	7.409	1.10371e+07	4	1	0	98.8	9.9			Extractables/Leachables; Textile Chemicals/Auxiliary/Dyes; Personal Care Products/Cosmetics; Industrial Chemicals; Endogenous Metabolites; Excipients/Additives/Colorants	C00511	Reference-2696	No matches found	No matches found	DDA for preferred ion	[M-H]-1	4.92682e+06	8.08886e+06	5.08586e+06	5.61863e+06	5.14834e+06	5.30025e+06	6.368e+06	9.18762e+06	4.58044e+06	6.42076e+06	8.09483e+06	7.06397e+06	6.00334e+06	7.50163e+06	6.7665e+06	8.40056e+06	5.41153e+06	5.88751e+06	4.84023e+06	1.10371e+07	5.4608e+06	5.25667e+06
	FALSE	Gentisic acid	C7 H6 O4	Full match	Full match	No results	Full match	Not the top hit	-1.87	154.026	153.019	6.669	1.07717e+07	10	1	0	83.6	9.2			Therapeutics/Prescription Drugs; Endogenous Metabolites	C00628	Reference-110	No matches found	No matches found	DDA for preferred ion	[M-H]-1	7.49986e+06	8.65194e+06	4.78549e+06	9.19815e+06	5.61501e+06	5.53291e+06	4.45768e+06	4.82024e+06	9.11528e+06	6.6834e+06	8.87184e+06	6.46356e+06	8.60669e+06	8.74502e+06	6.38616e+06	1.07717e+07	7.63005e+06	6.79937e+06	7.02504e+06	6.09722e+06	5.30567e+06	6.77486e+06
	FALSE	?-Muricholic Acid	C24 H40 O5	Full match	Full match	No results	No results	Not the top hit	-1.3	408.287	407.28	11.063	1.06625e+07	20	5	0	97.8	9.9			Endogenous Metabolites		Autoprocessed-8518	No matches found	No matches found	DDA for preferred ion	[M-H]-1	1.45669e+06	727237	1.14473e+06	4.79574e+06	1.21305e+06	64188.2	286389	701613	1.96168e+06	4.65548e+06	528367	332242	194624	279964	1.60038e+06	1.49252e+06	456212	764731	215572	482899	394121	152979
	FALSE	Arachidonic acid	C20 H32 O2	Full match	Full match	No results	Partial match	Full match	-1.72	304.24	303.232	8.351	1.0561e+07	23	4	0	92.6	78.9	67.3		Endogenous Metabolites; Natural Products/Medicines; Extractables/Leachables; Excipients/Additives/Colorants; Personal Care Products/Cosmetics	C00219	Reference-2742	No matches found	No matches found	DDA for preferred ion	[M-H]-1	2.38394e+06	1.98162e+06	5.05771e+06	2.94245e+06	546965	1.90203e+06	3.28447e+06	1.52615e+06	3.61939e+06	1.48109e+06	4.21356e+06	3.92202e+06	1.56742e+06	5.61827e+06	4.45058e+06	3.53963e+06	2.11265e+06	6.6944e+06	1.43345e+06	1.0561e+07	3.64551e+06	3.42917e+06
	FALSE	Arachidonic acid	C20 H32 O2	Full match	Full match	No results	Partial match	Full match	-2.4	304.24	303.232	8.517	1.05464e+07	23	4	0	92.6	78.9	67.3		Endogenous Metabolites; Natural Products/Medicines; Extractables/Leachables; Excipients/Additives/Colorants; Personal Care Products/Cosmetics	C00219	Reference-2742	No matches found	No matches found	DDA for preferred ion	[M-H]-1	3.59862e+06	1.05464e+07	726492	2.86331e+06	546965	5.83071e+06	2.03474e+06	405839	5.66336e+06	2.17397e+06	6.39897e+06	3.36009e+06	6.94676e+06	2.4496e+06	3.37522e+06	5.73349e+06	951983	2.51156e+06	2.51955e+06	2.64471e+06	2.03861e+06	3.54374e+06
	FALSE	Arachidonic acid	C20 H32 O2	Full match	Full match	No results	Partial match	Full match	-2.32	304.24	303.232	8.455	1.05464e+07	23	4	0	92.6	78.9	67.3		Endogenous Metabolites; Natural Products/Medicines; Extractables/Leachables; Excipients/Additives/Colorants; Personal Care Products/Cosmetics	C00219	Reference-2742	No matches found	No matches found	DDA for preferred ion	[M-H]-1	5.88096e+06	1.05464e+07	2.01394e+06	2.86331e+06	546965	6.27143e+06	2.56422e+06	1.10331e+06	5.66336e+06	2.17397e+06	5.43179e+06	7.14965e+06	6.94676e+06	2.39163e+06	5.20943e+06	5.73349e+06	1.78812e+06	2.25166e+06	3.881e+06	3.70524e+06	4.51322e+06	6.16869e+06
	FALSE	β-Muricholic acid	C24 H40 O5	Full match	Full match	No results	No results	Not the top hit	-2.39	408.287	407.279	9.289	1.05022e+07	20	5	0	98.3	9.9			Endogenous Metabolites		Autoprocessed-8518	No matches found	No matches found	DDA for preferred ion	[M-H]-1	951654	250963	349307	522395	389181	222511	2.03965e+06	472094	1.3259e+06	1.18666e+06	455032	1.10985e+06	820760	947766	512067	1.26046e+06	1.05022e+07	870152	711007	1.42762e+06	1.66737e+06	1.5451e+06
	FALSE	Pinolenic acid	C18 H30 O2	Not the top hit	Full match	No results	Partial match	Partial match	-2.42	278.224	277.217	8.462	1.04682e+07	6	6	0	86.6	9.3					Reference-6595	No matches found	No matches found	DDA for preferred ion	[M-H]-1	3.91946e+06	6.68694e+06	1.97836e+06	1.84412e+06	1.60147e+06	2.14685e+06	3.05804e+06	5.98106e+06	7.08829e+06	2.13136e+06	4.00967e+06	3.50189e+06	8.45399e+06	4.29262e+06	1.35894e+06	2.97507e+06	2.8551e+06	1.42885e+06	1.04682e+07	3.20541e+06	809716	6.22703e+06
	FALSE	2-Hydroxyhippuric acid	C9 H9 N O4	No match	Invalid mass	No results	No results	No results	15.5	195.056	194.049	2.275	1.04011e+07	0	4	0	93.7	9.7			Endogenous Metabolites	C07588	Reference-529	No matches found	No matches found	DDA for preferred ion	[M-H]-1	6.90866e+06	7.35015e+06	2.10211e+06	6.91369e+06	1.64664e+06	2.57306e+06	5.08035e+06	4.83332e+06	3.20202e+06	4.18665e+06	2.17187e+06	2.3887e+06	683611	3.9985e+06	3.6743e+06	5.15657e+06	2.69127e+06	2.38264e+06	1.56316e+06	4.1255e+06	2.4755e+06	1.04011e+07
	FALSE	Deoxycholic acid	C24 H40 O4	Full match	Full match	No results	No results	Not the top hit	-1.53	392.292	391.285	9.816	9.3894e+06	19	2	0	98.3	9.9			Endogenous Metabolites		Autoprocessed-8527	No matches found	No matches found	DDA for preferred ion	[M-H]-1	498406	1.77871e+06	2.18833e+06	373745	1.21139e+06	449901	292682	819956	168949	736496	854949	1.16461e+06	554994	398343	796819	759339	876856	570344	498890	1.84332e+06	542354	835833
	FALSE	3-Hydroxypyridine	C5 H5 N O	Full match	Full match	No results	No results	Partial match	-2.68	95.0369	94.0296	6.331	9.10945e+06	3	1	0	97.8	9.9			Pesticides/Herbicides		Reference-3323	No matches found	No matches found	DDA for preferred ion	[M-H]-1	4.65453e+06	9.10945e+06	4.22742e+06	5.43993e+06	4.12354e+06	4.71786e+06	3.79675e+06	5.55272e+06	4.758e+06	5.70425e+06	7.7429e+06	6.81677e+06	7.02654e+06	5.5295e+06	5.15824e+06	8.33175e+06	6.18749e+06	5.86367e+06	4.99245e+06	7.53675e+06	6.56049e+06	7.19878e+06
	FALSE	Phenol	C6 H6 O	Full match	Full match	No results	Full match	Full match	-3.39	94.0416	139.04	1.033	8.98324e+06	1	1	0	81.6	9.1			Industrial Chemicals; Excipients/Additives/Colorants; Therapeutics/Prescription Drugs; Personal Care Products/Cosmetics; Endogenous Metabolites; Pesticides/Herbicides; Extractables/Leachables; Textile Chemicals/Auxiliary/Dyes; Natural Products/Medicines	C00146	Reference-3052	No matches found	No matches found	DDA for preferred ion	[M+FA-H]-1	7.92816e+06	8.98324e+06	5.3053e+06	5.80083e+06	5.09449e+06	6.64627e+06	6.5068e+06	5.14721e+06	7.47403e+06	8.08261e+06	5.59626e+06	8.21422e+06	6.98945e+06	8.41888e+06	7.87922e+06	7.41886e+06	8.17381e+06	6.15925e+06	6.44372e+06	7.46054e+06	6.89221e+06	7.1204e+06
	FALSE	D-(+)-Maltose	C12 H22 O11	Not the top hit	Full match	No results	Partial match	Not the top hit	-1.83	342.116	341.108	11.067	8.92988e+06	59	4	0	80.2	48.6			Endogenous Metabolites; Excipients/Additives/Colorants	C01971	Reference-6213	No matches found	No matches found	DDA for preferred ion	[M-H]-1	3.96795e+06	8.92988e+06	3.58228e+06	4.45841e+06	4.7502e+06	3.73507e+06	2.77319e+06	3.09598e+06	3.00289e+06	4.12789e+06	5.48826e+06	4.52029e+06	6.51444e+06	3.60907e+06	3.11199e+06	6.98759e+06	3.86254e+06	3.37242e+06	3.90966e+06	5.32601e+06	6.32028e+06	5.94375e+06
	FALSE	Benzoic acid	C7 H6 O2	No match	Invalid mass	No results	No results	No match	147580	140.047	139.04	1.141	8.41888e+06	13	2	0	99.6	10			Industrial Chemicals; Excipients/Additives/Colorants; Endogenous Metabolites	C00180	Reference-332	No matches found	No matches found	DDA for other ion	[M-H]-1	7.92816e+06	3.67785e+06	5.3053e+06	5.80083e+06	5.09449e+06	6.64627e+06	6.5068e+06	5.14721e+06	7.47403e+06	8.08261e+06	5.59626e+06	8.21422e+06	6.98945e+06	8.41888e+06	7.87922e+06	7.41886e+06	8.17381e+06	6.15925e+06	6.44372e+06	7.46054e+06	6.89221e+06	7.1204e+06
	FALSE	β-Muricholic acid	C24 H40 O5	Full match	Full match	No results	No results	Not the top hit	-2.03	408.287	407.279	7.881	8.41551e+06	20	5	0	93.4	9.7			Endogenous Metabolites		Autoprocessed-8518	No matches found	No matches found	DDA for preferred ion	[M-H]-1	3.68572e+06	1.77905e+06	1.26622e+06	1.38418e+06	1.20049e+06	844503	1.07263e+06	2.68012e+06	2.16052e+06	3.50966e+06	3.57908e+06	2.65114e+06	1.57124e+06	2.58139e+06	1.4174e+06	3.18721e+06	4.07557e+06	2.84459e+06	1.32742e+06	2.21552e+06	5.54202e+06	2.51121e+06
	FALSE	Deoxycholic acid	C24 H40 O4	Full match	Full match	No results	No results	Not the top hit	-1.38	392.292	391.285	11.24	8.21681e+06	19	2	0	93.2	9.7			Endogenous Metabolites		Autoprocessed-8527	No matches found	No matches found	DDA for preferred ion	[M-H]-1	4.89664e+06	1.81773e+06	542997	867676	623650	703391	349932	1.30912e+06	2.13761e+06	397061	5.60773e+06	5.2274e+06	496319	116492	211120	2.07845e+06	304381	4.65287e+06	204627	813331	231288	4.9712e+06
	FALSE	?-Muricholic Acid	C24 H40 O5	Full match	Full match	No results	No results	Not the top hit	-1.85	408.287	407.28	11.873	8.02098e+06	20	5	0	86.6	9.3			Endogenous Metabolites		Autoprocessed-8518	No matches found	No matches found	DDA for preferred ion	[M-H]-1	299722	128121	289663	183205	4.39396e+06	208082	462142	362402	267682	663562	284246	1.36289e+06	1.06192e+06	173547	237239	4.12638e+06	2.5083e+06	190105	8.02098e+06	278291	4.96824e+06	813121
	FALSE	Deoxycholic acid	C24 H40 O4	Full match	Full match	No results	No results	Not the top hit	-1.81	392.292	391.285	9.365	7.75216e+06	19	2	0	98.8	9.9			Endogenous Metabolites		Autoprocessed-8527	No matches found	No matches found	DDA for preferred ion	[M-H]-1	3.85569e+06	81678.3	2.44918e+06	2.56975e+06	76928.6	820589	6.02182e+06	789927	174382	1.6932e+06	1.08976e+06	5.15529e+06	3.05329e+06	1.00885e+06	706629	5.51903e+06	7.75216e+06	1.47902e+06	1.46115e+06	1.32658e+06	2.00533e+06	3.04776e+06
	FALSE	β-Muricholic acid	C24 H40 O5	Full match	Full match	No results	No results	Not the top hit	-1.89	408.287	407.28	9.502	7.03809e+06	20	5	0	98.4	9.9			Endogenous Metabolites		Autoprocessed-8518	No matches found	No matches found	DDA for preferred ion	[M-H]-1	566571	230874	819306	848210	444173	245115	330504	357045	2.25461e+06	750471	433432	566380	432333	574904	368567	1.11735e+06	675099	567205	467619	718652	946731	2.81794e+06
	FALSE	Vanillin	C8 H8 O3	No match	Invalid mass	No results	No results	No results	17.71	152.05	151.043	1.075	6.73377e+06	0	11	0	86.7	9.3			Endogenous Metabolites; Excipients/Additives/Colorants; Personal Care Products/Cosmetics; Industrial Chemicals	D00091	Reference-2529	No matches found	No matches found	DDA for preferred ion	[M-H]-1	6.50707e+06	4.04548e+06	3.38298e+06	5.13561e+06	4.38055e+06	2.53647e+06	3.69765e+06	3.42683e+06	3.88586e+06	3.03841e+06	5.51648e+06	2.53979e+06	5.2001e+06	5.06796e+06	4.48145e+06	6.73377e+06	2.05266e+06	2.69477e+06	2.90454e+06	3.27818e+06	2.24202e+06	4.56508e+06
	FALSE	NP-019159	C26 H38 O8	No match	Invalid mass	No results	No results	No results	-123412	419.234	418.226	1.4	6.5489e+06	0	1	0	87.3	9.4			Endogenous Metabolites; Natural Products/Medicines		Autoprocessed-5734	No matches found	No matches found	DDA for other ion	[M-H]-1	5.35466e+06	1.04293e+06	499023	1.18125e+06	747048	1.54113e+06	3.05028e+06	2.80515e+06	1.89888e+06	3.17634e+06	3.9572e+06	1.92747e+06	1.87131e+06	6.0399e+06	6.5489e+06	3.00499e+06	5.54992e+06	1.67396e+06	1.61074e+06	3.07157e+06	3.37953e+06	2.27395e+06
	FALSE	NP-008607	C28 H46 O7	No match	Invalid mass	No results	No results	No results	-48662.7	470.269	469.261	1.443	6.5196e+06	0	1	0	90	9.5			Endogenous Metabolites; Natural Products/Medicines		Autoprocessed-7707	No matches found	No matches found	DDA for other ion	[M-H]-1	1.66304e+06	2.73228e+06	4.36469e+06	4.54027e+06	2.08314e+06	2.50173e+06	1.56887e+06	1.39704e+06	2.00576e+06	1.98577e+06	2.1102e+06	5.3988e+06	1.91929e+06	2.80773e+06	2.891e+06	3.08168e+06	1.09144e+06	1.36889e+06	2.59107e+06	1.5191e+06	1.54455e+06	2.23461e+06
	FALSE	Oleic acid	C18 H34 O2	No match	Invalid mass	No results	No results	No match	63808	300.266	299.259	8.726	6.44421e+06	12	3	0	89	9.4			Endogenous Metabolites; Extractables/Leachables; Excipients/Additives/Colorants; Personal Care Products/Cosmetics; Industrial Chemicals	C00712	Reference-10	No matches found	No matches found	DDA for other ion	[M-H]-1	663861	991004	511255	594540	476490	418036	416870	919234	1.39764e+06	403126	2.06781e+06	1.25328e+06	6.44421e+06	559985	561510	2.92882e+06	360308	3.48526e+06	1.11551e+06	441950	1.00641e+06	2.17004e+06
	FALSE	Glycocholic acid	C26 H43 N O6	Full match	Full match	No results	No results	No results	-2.49	465.308	464.301	8.069	6.30491e+06	3	1	0	85.8	9.3			Endogenous Metabolites	C01921	Reference-429	No matches found	No matches found	DDA for preferred ion	[M-H]-1	955601	768637	936276	691069	771477	425999	1.184e+06	1.04026e+06	803555	3.67866e+06	4.70492e+06	195779	615464	4.45373e+06	1.66604e+06	2.74421e+06	3.65667e+06	1.12663e+06	924827	6.30491e+06	1.92045e+06	991040
	FALSE	Benzoic acid	C7 H6 O2	No match	Invalid mass	No results	No results	No match	147581	140.047	139.04	11.541	6.30141e+06	13	2	0	97.1	9.9			Industrial Chemicals; Excipients/Additives/Colorants; Endogenous Metabolites	C00180	Reference-332	No matches found	No matches found	DDA for other ion	[M-H]-1	772334	4.19305e+06	3.97704e+06	4.25202e+06	1.39466e+06	1.45455e+06	837596	4.32154e+06	1.02798e+06	3.6435e+06	3.2935e+06	4.33037e+06	5.46363e+06	4.35896e+06	3.87393e+06	3.25022e+06	4.13829e+06	752503	1.68372e+06	2.98945e+06	2.56254e+06	6.30141e+06
	FALSE	NP-012768	C31 H46 N4 O6	No match	Full match	No results	No results	No match	-4.38	570.339	569.332	10.024	6.19605e+06	1	1	0	89.7	9.5			Endogenous Metabolites; Natural Products/Medicines		Autoprocessed-7901	No matches found	No matches found	DDA for preferred ion	[M-H]-1	1.44165e+06	970185	2.40778e+06	1.73834e+06	2.24228e+06	990437	1.44432e+06	1.49454e+06	945059	2.6354e+06	1.71682e+06	1.12503e+06	1.47438e+06	6.19605e+06	3.32914e+06	3.18386e+06	2.22666e+06	1.72635e+06	2.23161e+06	4.29099e+06	2.97069e+06	1.66687e+06
	FALSE	6-Hydroxycaproic acid	C6 H12 O3	No match	Invalid mass	No results	No results	No match	-348321	86.0729	85.0657	5.166	6.16963e+06	17	3	0	97.5	65.4			Endogenous Metabolites	C06103	Reference-1203	No matches found	No matches found	DDA for other ion	[M-H]-1	1.72894e+06	1.61258e+06	1.46258e+06	469675	483158	658622	435372	642273	1.11146e+06	759351	1.66392e+06	465358	4.6234e+06	2.41674e+06	2.30121e+06	2.09309e+06	758279	6.16963e+06	601129	2.27024e+06	847638	1.19506e+06
	FALSE	?-Muricholic Acid	C24 H40 O5	Not the top hit	Full match	No results	No results	Not the top hit	-1.25	408.287	407.28	10.921	5.73019e+06	20	5	0	83.3	9.2			Endogenous Metabolites		Autoprocessed-8518	No matches found	No matches found	DDA for preferred ion	[M-H]-1	1.34102e+06	164211	2.03903e+06	172939	860225	1.7695e+06	326065	677957	725857	4.65548e+06	410821	1.34659e+06	255427	275355	967219	708971	540034	764731	244702	940446	478855	152979
	FALSE	(±)9-HpODE	C18 H32 O4	No match	Invalid mass	No results	No results	No match	-596117	126.104	125.097	1.441	5.71928e+06	23	4	0	81.4	49	62.7		Endogenous Metabolites		Autoprocessed-8563	No matches found	No matches found	DDA for other ion	[M-H]-1	1.96345e+06	5.71928e+06	3.22859e+06	1.39983e+06	1.19915e+06	1.6092e+06	5.12956e+06	1.75107e+06	3.12809e+06	1.93252e+06	4.22749e+06	3.77054e+06	4.45723e+06	4.74971e+06	4.14962e+06	2.99845e+06	3.14402e+06	2.49709e+06	1.49802e+06	2.09173e+06	2.45528e+06	3.0216e+06
	FALSE	?17-6-keto Prostaglandin F1?	C20 H32 O6	No results	Invalid mass	No results	No results	No results	-586927	152.102	151.094	4.807	5.65611e+06	0	11	0	87.5	50.7			Endogenous Metabolites		Autoprocessed-8447	No matches found	No matches found	DDA for other ion	[M-H]-1	990354	920315	1.11589e+06	1.24815e+06	640947	1.31069e+06	511395	721123	543692	1.48957e+06	2.6131e+06	514368	988957	1.84839e+06	5.65611e+06	5.02678e+06	3.29384e+06	726930	1.27651e+06	3.07082e+06	1.52107e+06	4.00654e+06
	FALSE	4-[2-(2,3-Dihydroxy-5,6,8a-trimethyloctahydro-2H-spiro[naphthalene-1,2'-oxiran]-5-yl)ethyl]-5-hydroxy-2(5H)-furanone	C20 H30 O6	Full match	Full match	No results	No results	Partial match	-2.08	366.203	365.196	10.073	5.60442e+06	5	4	0	86.9	9.3	61.8				Reference-7474	No matches found	No matches found	DDA for preferred ion	[M-H]-1	3.43295e+06	4.84342e+06	3.66915e+06	2.95979e+06	2.63467e+06	2.99894e+06	2.74104e+06	3.3026e+06	3.68078e+06	3.3047e+06	4.45855e+06	4.53143e+06	4.4064e+06	3.99012e+06	2.69308e+06	4.34262e+06	5.60442e+06	3.45666e+06	3.174e+06	2.80847e+06	4.11853e+06	3.95379e+06
	FALSE	Pipecolic acid	C6 H11 N O2	No match	Invalid mass	No results	No match	No match	139529	147.089	146.082	9.535	5.1514e+06	8	1	0	88.6	9.4			Endogenous Metabolites	C00408	Reference-548	No matches found	No matches found	DDA for other ion	[M-H]-1	2.72302e+06	4.3951e+06	1.52954e+06	2.61702e+06	1.90801e+06	1.70447e+06	2.0614e+06	1.71241e+06	1.54006e+06	1.82328e+06	3.95505e+06	2.41153e+06	3.91964e+06	2.88377e+06	2.75336e+06	5.1514e+06	2.21914e+06	3.38867e+06	1.96363e+06	4.50147e+06	2.30597e+06	3.10433e+06
	FALSE	NP-012768	C31 H46 N4 O6	Not the top hit	Full match	No results	No results	No match	-4.67	570.339	569.332	9.313	4.92662e+06	1	1	0	83.7	49.6			Endogenous Metabolites; Natural Products/Medicines		Autoprocessed-7901	No matches found	No matches found	DDA for preferred ion	[M-H]-1	1.2092e+06	713300	902301	1.87978e+06	1.11595e+06	87212.9	1.76054e+06	2.52364e+06	1.72537e+06	1.27954e+06	2.02402e+06	711587	912706	4.60716e+06	2.69281e+06	2.18117e+06	954550	700312	569572	4.92662e+06	1.9818e+06	1.40761e+06
	FALSE	?-Muricholic Acid	C24 H40 O5	Full match	Full match	No results	No results	Not the top hit	-1.5	408.287	407.28	10.866	4.65548e+06	20	5	0	83.3	9.2			Endogenous Metabolites		Autoprocessed-8518	No matches found	No matches found	DDA for preferred ion	[M-H]-1	158512	1.19255e+06	1.61033e+06	45442.8	120815	1.28102e+06	376950	430292	428082	4.65548e+06	197379	2.14423e+06	173388	184067	426053	842083	196320	764731	167179	847086	333098	152979
	FALSE	?-Muricholic Acid	C24 H40 O5	Full match	Full match	No results	No results	Not the top hit	-1.79	408.287	407.28	10.069	4.52986e+06	20	5	0	98	9.9			Endogenous Metabolites		Autoprocessed-8518	No matches found	No matches found	DDA for preferred ion	[M-H]-1	268208	187988	1.92711e+06	55550.8	3.36741e+06	32178.7	592268	447471	440379	4.52986e+06	497192	1.65211e+06	318181	382432	934869	442059	1.34277e+06	290952	293944	3.8648e+06	683009	970325
	FALSE	2-Anisic acid	C8 H8 O3	No match	Invalid mass	No results	No results	No results	18.04	152.05	151.043	1.272	3.99077e+06	0	11	0	81.6	67			Endogenous Metabolites; Excipients/Additives/Colorants		Reference-1252	No matches found	No matches found	DDA for preferred ion	[M-H]-1	1.79758e+06	936828	680821	1.99621e+06	988435	514084	944346	682003	1.69057e+06	872967	1.12884e+06	356003	976551	1.2794e+06	955000	2.03686e+06	803375	2.86313e+06	783245	1.31148e+06	337514	1.18121e+06
	FALSE	β-Muricholic acid	C24 H40 O5	Full match	Full match	No results	No results	Not the top hit	-2.01	408.287	407.279	9.177	3.97082e+06	20	5	0	98.3	9.9			Endogenous Metabolites		Autoprocessed-8518	No matches found	No matches found	DDA for preferred ion	[M-H]-1	521049	285813	331715	526178	1.36888e+06	213894	2.1398e+06	165772	525340	1.12136e+06	403212	1.87163e+06	547484	1.00119e+06	1.55701e+06	753816	320043	1.69824e+06	677390	2.76277e+06	1.65102e+06	1.90328e+06
	FALSE	NP-008607	C28 H46 O7	No match	Invalid mass	No results	No results	No match	72795.1	530.309	529.301	5.909	3.57454e+06	5	1	0	90.7	52.7			Endogenous Metabolites; Natural Products/Medicines		Autoprocessed-7707	No matches found	No matches found	DDA for preferred ion	[M-H]-1	1.18482e+06	875330	914923	1.2341e+06	2.57419e+06	1.03774e+06	2.64666e+06	1.14373e+06	1.32661e+06	376793	1.0899e+06	356476	831622	1.035e+06	1.27847e+06	1.55378e+06	378211	1.13159e+06	900049	673838	874057	1.37698e+06
	FALSE	Isophthalic acid	C8 H6 O4	No match	Invalid mass	No results	No results	No match	18.21	166.03	165.022	10.328	2.9608e+06	1	2	0	90.9	9.5			Extractables/Leachables; Industrial Chemicals; Textile Chemicals/Auxiliary/Dyes		Reference-3201	No matches found	No matches found	DDA for preferred ion	[M-H]-1	625337	988294	695566	527866	828248	917753	1.22209e+06	692072	846150	771627	760897	685416	1.27784e+06	1.36562e+06	2.9608e+06	920091	1.33336e+06	1.03676e+06	456198	1.16109e+06	768694	905360
	FALSE	Gentisic acid	C7 H6 O4	No match	Invalid mass	No results	No results	No results	19.54	154.03	153.022	0.821	2.93117e+06	0	6	0	91.6	9.6	54.7		Therapeutics/Prescription Drugs; Endogenous Metabolites	C00628	Reference-110	No matches found	No matches found	DDA for preferred ion	[M-H]-1	1.97468e+06	1.46513e+06	1.26428e+06	2.06233e+06	1.46106e+06	865616	691816	1.14023e+06	1.73402e+06	1.2288e+06	1.77757e+06	1.41281e+06	2.30672e+06	2.16596e+06	1.7299e+06	2.93117e+06	1.60439e+06	1.6465e+06	1.25637e+06	2.17275e+06	1.40614e+06	1.42709e+06
	FALSE	2,4-Quinolinediol	C9 H7 N O2	No match	Invalid mass	No results	No results	No match	111853	179.061	178.054	6.398	2.29943e+06	3	5	0	92.9	9.6	54.6			C16716	Reference-157	No matches found	No matches found	DDA for other ion	[M-H]-1	926368	577107	490006	2.29943e+06	1.24151e+06	1.86434e+06	606900	1.00674e+06	716359	560087	805946	647217	373909	1.0707e+06	699777	606752	185447	452612	558973	446376	1.07213e+06	1.37426e+06
	FALSE	Glycochenodeoxycholic acid	C26 H43 N O5	Not the top hit	Full match	No results	No results	Full match	-1.63	449.313	448.306	6.684	2.10684e+06	1	5	0	90.3	9.5			Endogenous Metabolites	C05466	Reference-9839	No matches found	No matches found	DDA for preferred ion	[M-H]-1	1.19995e+06	1.34549e+06	886643	1.11665e+06	1.20063e+06	1.05094e+06	1.63652e+06	1.93121e+06	1.2651e+06	1.94802e+06	1.95886e+06	866974	809416	1.7647e+06	1.56523e+06	1.77912e+06	1.40338e+06	1.59122e+06	1.00943e+06	2.10684e+06	861072	1.32978e+06
	FALSE	(3β,5ξ,9ξ)-3,23-Dihydroxy-1-oxoolean-12-en-28-oic acid	C30 H46 O5	No match	Invalid mass	No results	No results	No match	-94597.2	440.329	439.321	1.419	1.65181e+06	1	2	0	88.1	9.4					Reference-7834	No matches found	No matches found	DDA for other ion	[M-H]-1	692859	1.44297e+06	1.61476e+06	817588	951163	780993	684903	1.01867e+06	735646	714069	1.28928e+06	951883	1.65181e+06	1.21172e+06	1.30078e+06	1.29344e+06	1.33748e+06	1.17615e+06	641845	1.35967e+06	1.00718e+06	858795
	FALSE	NP-008607	C28 H46 O7	No match	Invalid mass	No results	No results	No results	-20309.4	484.285	483.277	1.453	1.46188e+06	0	1	0	90	9.5			Endogenous Metabolites; Natural Products/Medicines		Autoprocessed-7707	No matches found	No matches found	DDA for other ion	[M-H]-1	676916	384651	295271	360673	283327	283680	274954	1.26283e+06	731804	354991	344365	1.46188e+06	507266	411667	661961	487052	861499	358451	299471	318501	362875	369277
	FALSE	6-Hydroxycaproic acid	C6 H12 O3	No match	Invalid mass	No results	No match	No match	-454436	72.0573	71.05	5.279	1.30242e+06	9	3	0	97.5	65.4			Endogenous Metabolites	C06103	Reference-1203	No matches found	No matches found	DDA for other ion	[M-H]-1	344335	364363	200264	304962	273553	233059	218653	266268	238215	354811	326385	390494	323788	441762	531659	450376	392496	356943	316709	286196	422164	695309
	FALSE	N-{[(2R,4S,5R)-5-(3-Cyclopentyl-1-methyl-1H-pyrazol-5-yl)-1-azabicyclo[2.2.2]oct-2-yl]methyl}-4-methoxybenzamide	C25 H34 N4 O2	Not the top hit	Full match	No results	No results	No match	-4.65	422.266	421.259	10.246	700662	1	1	0	80	9					Reference-9074	No matches found	No matches found	DDA for preferred ion	[M-H]-1	322199	207743	283166	700662	118509	422128	623269	563484	218327	302170	259402	371404	122024	454454	224977	297456	320899	220588	253157	251414	202983	290979
[truncated: 84 more columns]
