# Supplementary material for: Bifidobacterium longum supplementation prevents intestinal inflammation and cognitive impairment in sleep-deprived mice by modulating clock gene expression
Source: Royal Society of Chemistry journal article supplement (doi:10.1039/d5fo02921j), 2025-11-10
Supplement: d5fo02921j3.pdf [file d5fo02921j3.pdf]

## 1 Supplementary Methods

### 2 1. Modified multiple platform water bath method (MMPM)

3 Each MMPM device consisted of a large tank (40×30×20 cm) and eight platforms (3 cm in  
4 diameter, 4 cm in height, 3 cm interval between platform) situated within the tank, surrounded by  
5 water up to 1-2 cm beneath the platform surface. SD-treated mice were placed in this device, which  
6 allowed them to move easily between the platforms, and permitted them to eat and drink freely.  
7 When the mice entered rapid eye movement sleep, muscle atonia could cause them to fall into the  
8 water and wake up. The mice would then try to climb up quickly to prevent drowning. During the SD  
9 period, the water at the bottom of the tank was kept clear, and the temperature was maintained at 20-  
10 25°C. In the CON group, mice were placed in a water tank with four large platforms (12 cm in  
11 diameter, 4 cm in height)<sup>1-3</sup>.

### 12 2. Behavioral tests

13 All mice were transferred to the behavior testing room at least 30 minutes prior to test  
14 commencement to habituate to the conditions. All tests were conducted between 8:00 and 17:00,  
15 during the light phase of the cycle, in the following sequence.

#### 16 2.1. Y-maze test

17 The mouse was placed in the center of the Y-maze (comprising 3 arms, each 30 cm in length  
18 and spaced 120° apart) and allowed to explore the arms freely for 5 min. The number of all arm  
19 entries and alternations was recorded by the software. An arm entry was only recorded if the mouse  
20 entered the arm completely<sup>4</sup>.

#### 21 2.2. Elevated plus maze test

22 The elevated plus maze has a “+” configuration and consists of two open arms (25×5×0.5 cm)  
23 and two closed arms (25×5×16 cm) with a center platform (5×5×0.5 cm). Each mouse was placed in  
24 the central square facing one of the open arms and allowed to move freely for 5 minutes. The number  
25 of entries (defined as the mouse’s nose tip entering the arm) into each arm and time spent in the open  
26 arms were recorded and used to calculate the mice’s anxiety-like behavior<sup>4</sup>.

#### 27 2.3. Open-field test

28 The open-field test was used to assess exploratory activities and anxiety-like behavior. The  
29 apparatus was a 50×50 cm open arena with 30 cm high walls. The mouse was placed in the center of  
30 the open field and allowed to explore freely for 8 min. The number of explorations and time spent in  
31 the inner area (33×33 cm), as well as the mouse's path throughout the apparatus, were recorded by  
32 software<sup>4</sup>.

#### 33 2.4. Morris water maze test

34 The Morris water maze was used to evaluate the spatial learning and memory capabilities of  
35 mice. It was conducted in a circular tank divided into four quadrants. A platform was hidden 1 cm  
36 below the surface of the milky water and placed in the center of one quadrant. During the training  
37 trial, mice were allowed to swim for 60 s to locate the hidden platform and stay on it for 10 s after  
38 researching it. If a mouse could not find the platform within 60 s, it was guided to the submerged  
39 platform. The mice were trained twice per day over five consecutive days, with an inter-trial interval  
40 of 2-3 h. On the last day, the mice were tested for memory retention within 60 s in the absence of the  
41 platform. The movement path and number of times crossing the original platform location were  
42 recorded<sup>5</sup>.

#### 43 3. 16S rDNA amplicon sequencing

44 Genomic DNA was extracted from fecal samples using a FastDNA Spin Kit for Feces (MP  
45 Biomedicals, USA). The V3-V4 region of the 16S rDNA gene was amplified from microbial  
46 genomic DNA using primers 341F (5'-CCTAYGGGRBGCASCAG-3') and 806R (5'-  
47 GGACTACNNGGGTATCTAAT-3'). A special barcode was added to the 5' end of the forward  
48 primer to identify each sample. The PCR system and program were as described previously<sup>6, 7</sup>. The  
49 products were excised from a 1.5% agarose gel, purified using DNA Gel/PCR Purification Miniprep  
50 Kit (Hangzhou Beiwo Medical Technology Co., Ltd., China), and quantified using a NanoDrop  
51 microvolume spectrophotometer (Thermo Fisher Scientific, USA). Libraries were prepared using the  
52 TruSeq DNA LT Sample Preparation Kit (Illumina, San Diego, CA, USA) and sequenced for 500 +  
53 7 cycles on a NestSeq 2000 using a MiSeq Reagent Kit. Sequence analysis was performed using the  
54 Quantitative Insights into Microbial Ecology 2 (QIIME2) with the DADA 2 package. QIIME2 was  
55 used to calculate the Shannon index and the Bray-Curtis distance (as a metric of beta diversity).  
56 Principal coordinates analysis was performed on a website (<https://www.omicstudio.cn/tool>) to

57 obtain principal coordinates and visualize complex, multidimensional data. To confirm differences in  
58 the abundances of individual taxa between groups, the Linear Discriminant Analysis Effect Size  
59 method was used on a website (<https://www.bic.ac.cn/BIC/#/>) for quantitative biomarker analysis  
60 (LDA > 3).

#### 61 **4. Metabolites extraction and non-targeted metabolome analysis**

62 Fecal samples (60 mg,  $\pm 1\%$ ) were collected from the four groups of mice. A 600  $\mu\text{L}$  ice-cold  
63 mixture solution (methanol:acetonitrile:water = 2:2:1, v/v/v,  $-20^\circ\text{C}$ ) and three steel beads were added  
64 to each fecal sample. The samples were vortexed for 30 s, homogenized at 60 Hz for 45 s for 8  
65 cycles, and then ultrasonicated in an ice bath for 10 minutes. All samples were incubated at  $-20^\circ\text{C}$  for  
66 1 h to precipitate proteins and centrifuged at 15,000 rpm for 15 min at  $4^\circ\text{C}$  to collect the supernatant.  
67 Aliquots of each sample (5  $\mu\text{L}$ ) were taken out and mixed to serve as quality control sample<sup>8</sup>.

68 For LC-MS analysis, a UPLC BEH Amide column (1.7  $\mu\text{m}$ , 2.1 mm  $\times$  100 mm, Waters) was  
69 used. Mobile phase A was water containing 25 mM  $\text{CH}_3\text{COONH}_4$  and 25 mM  $\text{NH}_4\text{OH}$ , while  
70 mobile phase B was 100% acetonitrile. The spectrum signal was acquired by electrospray ionization  
71 using positive and negative ionization modes. The resulting LC-MS data were processed using  
72 Compound Discoverer 3.3 (Thermo Fisher Scientific, USA), and all features from positive and  
73 negative modes were combined into a single feature table for analysis. Partial least squares  
74 discriminant analysis and volcano plots were performed using MetaboAnalyst 6.0  
75 (<https://www.metaboanalyst.ca>). Differential metabolites were selected based on fold change (FC)  
76 and significance from Student's t-test ( $\text{FC} > 1.5$  or  $\text{FC} < 0.67$ ,  $p < 0.05$ )<sup>9, 10</sup>. Metabolic pathway  
77 enrichment analysis based on differential metabolites with known KEGG IDs was performed using  
78 MetaboAnalyst 6.0.

#### 79 **References**

- 80 1 W. T. Li, Z. X. Wang, J. Cao, Y. L. Dong and Y. X. Chen, Melatonin improves the homeostasis of mice  
81 gut microbiota rhythm caused by sleep restriction, *Microbes Infect.*, 2023, **25**, 105121.
- 82 2 D. F. Yang, W. C. Huang, C. W. Wu, C. Y. Huang, Y. Yang and Y. T. Tung, Acute sleep deprivation  
83 exacerbates systemic inflammation and psychiatry disorders through gut microbiota dysbiosis and  
84 disruption of circadian rhythms, *Microbiol. Res.*, 2023, **268**, 127292.
- 85 3 T. Gao, Z. X. Wang, Y. L. Dong, J. Cao, R. T. Lin, X. T. Wang, Z. Q. Yu and Y. X. Chen, Role of  
86 melatonin in sleep deprivation-induced intestinal barrier dysfunction in mice, *J. Pineal Res.*, 2019, **67**,  
87 e12574.

88 4 N. Li, S. W. Tan, Y. Wang, J. Deng, N. Wang, S. Zhu, W. Tian, J. Xu and Q. Wang, *Akkermansia*  
89 *muciniphila* supplementation prevents cognitive impairment in sleep-deprived mice by modulating  
90 microglial engulfment of synapses, *Gut Microbes*, 2023, **15**, 2252764.

91 5 X. Y. Sun, L. J. Li, Q. X. Dong, J. Zhu, Y. R. Huang, S. J. Hou, X. L. Yu and R. T. Liu, Rutin prevents tau  
92 pathology and neuroinflammation in a mouse model of Alzheimer's disease, *J. Neuroinflamm.*, 2021, **18**,  
93 131.

94 6 L. L. Wang, L. J. Hu, Q. Xu, B. X. Yin, D. S. Fang, G. Wang, J. X. Zhao, H. Zhang and W. Chen,  
95 *Bifidobacterium adolescentis* exerts strain-specific effects on constipation induced by loperamide in  
96 BALB/c mice, *Int. J. Mol. Sci.*, 2017, **18**, 318.

97 7 L. L. Zhao, G. Wang, P. Siegel, C. He, H. Z. Wang, W. J. Zhao, Z. X. Zhai, F. W. Tian, J. X. Zhao, H.  
98 Zhang, Z. K. Sun, W. Chen, Y. Zhang and H. Meng, Quantitative genetic background of the host  
99 influences gut microbiomes in chickens, *Sci Rep*, 2013, **3**, 1163.

100 8 Y. X. Feng, Y. Xiao, X. T. Li, M. Guo, L. J. Huang, W. W. Lu, J. X. Zhao and W. Chen, Prebiotic roles  
101 and anti-aging effects of xylo-oligosaccharide: Keystone responsive bacteria and their metabolic  
102 interactions, *Food Res. Int.*, 2025, **215**, 116673.

103 9 L. Wang, Q. Y. Ye, J. Zhu and H. B. Jiang, Non-targeted metabolomics of intestinal flora in seborrheic  
104 patients based on ultra-high performance liquid chromatographyquadrupole time-of-flight mass  
105 spectrometry (UHPLC-QTOF-MS) techniques, *Ann. Palliat. Med.*, 2021, **10**, 4354-4368.

106 10 A. Valdés, S. Ruiz-Saavedra, N. Salazar, A. Cifuentes, A. Suarez, Y. Díaz, C. G. Del Rey, S. González and  
107 C. G. de Los Reyes-Gavilán, Faecal metabolome profiles in individuals diagnosed with hyperplastic polyps  
108 and conventional adenomas, *Int. J. Mol. Sci.*, 2024, **25**, 13324.
